# Supplementary material for: Los Chocoyos supereruption did not trigger millennial scale cooling
Source: Research Square preprint supplement (doi:10.21203/rs.3.rs-3310024/v1), 2024-01-25
Supplement: Supplementary file 1 [file 90d0c206e905ba99c1b1766f.xlsx]

## Sheet: Readme
Tab	Col	Description
1 -- NGRIP_CFA	A	NGRIP Depth (m)
	B	GICC05 Age (year Before Present, BP 1950)
	C	AICC2012 Age (year Before Present, BP 1950), synchronized with EDC at 79512 yr BP
	D	Thinning-corrected accumulation rate (ice equivalent per year)
	E	Sulfate concentration (ng/g)
	F	Background sulfate concentration [181-point reduced running median] (ng/g)
	G	Volcanic sulfate concentration (ng/g)
	H	Volcanic sulfate deposition (kg/km2)
	E	Cumulative volcanic sulfate deposition (kg/km2)
2 -- NGRIP_IC	A	NGRIP Bottom Depth (m)
	B	NGRIP Top Depth (m)
	C	GICC05 Bottom Age (year Before Present, BP 1950)
	D	GICC05 Top Age (year Before Present, BP 1950)
	E	AICC2012 Bottom Age (year Before Present, BP 1950), synchronized with EDC at 79512 yr BP
	F	AICC2012 Top Age (year Before Present, BP 1950), synchronized with EDC at 79512 yr BP
	G	Thinning-corrected accumulation rate (ice equivalent per year)
	H	Sulfate concentration (ng/g)
	I	Background sulfate concentration (ng/g)
	J	Volcanic sulfate concentration (ng/g)
	K	Volcanic sulfate deposition (kg/km2)
	L	Cumulative volcanic sulfate deposition (kg/km2)
3 -- NEEM_IC	A	NEEM Bottom Depth (m)
	B	NEEM Top Depth (m)
	C	GICC05 Bottom Age (year Before Present, BP 1950)
	D	GICC05 Top Age (year Before Present, BP 1950)
	E	AICC2012 Bottom Age (year Before Present, BP 1950), synchronized with EDC at 79512 yr BP
	F	AICC2012 Top Age (year Before Present, BP 1950), synchronized with EDC at 79512 yr BP
	G	Thinning-corrected accumulation rate (ice equivalent per year)
	H	Sulfate concentration (ng/g)
	I	Background sulfate concentration (ng/g)
	J	Volcanic sulfate concentration (ng/g)
	K	Volcanic sulfate deposition (kg/km2)
	L	Cumulative volcanic sulfate deposition (kg/km2)
4 -- GISP2_ICP-MS	A	GISP2 Depth (m)
	B	AICC2012 Age (year Before Present, BP 1950), synchronized with EDC at 79512 yr BP
	C	Thinning-corrected accumulation rate (ice equivalent per year)
	D	Particle 2.6-4.5 mm (mg/g)
	E	Particle 4.5-9.5 mm (mg/g)
	F	Sulfur concentration (ng/g)
	G	Non-sea-salt sulfur concentration (ng/g)
	H	Background sulfate concentration [101-point reduced running median] (ng/g)
	I	Volcanic sulfate concentration (ng/g)
	J	Volcanic sulfate deposition (kg/km2)
	K	Cumulative volcanic sulfate deposition (kg/km2)
5 -- EDML_FIC	A	EDML Depth (m)
	B	AICC2012 Age (year Before Present, BP 1950), synchronized with EDC at 79512 yr BP
	C	AICC2012 Age (year Before Present, BP 1950)
	D	Thinning-corrected accumulation rate (ice equivalent per year)
	E	Sulfate concentration (ng/g)
	F	Background sulfate concentration [181-point reduced running median] (ng/g)
	G	Volcanic sulfate concentration (ng/g)
	H	Volcanic sulfate deposition (kg/km2)
	I	Cumulative volcanic sulfate deposition (kg/km2)
6 -- EDC_FIC	A	EDC Depth (m)
	B	AICC2012 Age (year Before Present, BP 1950)
	C	Thinning-corrected accumulation rate (ice equivalent per year)
	D	Sulfate concentration (ng/g)
	E	Background sulfate concentration [85-point reduced running median] (ng/g)
	F	Volcanic sulfate concentration (ng/g)
	G	Volcanic sulfate deposition (kg/km2)
	H	Cumulative volcanic sulfate deposition (kg/km2)
7a -- Atitlan_LCY	Summary of cumulative sulfate depositions at all ice-core sites; Antarctica and Greenland mean depositions; estimates of volcanic sulfur injection (TgS); using the mean of both NGRIP records.
7b -- Atitlan_LCY	As above but only using the NGRIP depositions based on the CFA data (Tab1)

## Sheet: 1 -- NGRIP_CFA
NGRIP Depth (m)	GICC05 Age (yr BP)	AICC2012 Age (yr BP) synched with EDC	ACC (ie/yr)	NGRIP SO42- (ng/g)	Background SO42- [181-pt RRM] (ng/g)	Volcanic SO42- (ng/g)	Volcanic SO42- Deposition (kg/km2)	Cumulative Volcanic SO42- (kg/km2)
2608.51	79144.3	78625.6	0.10675	43.049	48.812	0	0	N/A
2608.52	79145.1	78626.5	0.10663	37.5893	48.812	0	0	N/A
2608.53	79145.9	78627.3	0.10651	41.9282	48.812	0	0	N/A
2608.54	79146.8	78628.2	0.10639	62.4807	49.0359	13.4448	1.0986	N/A
2608.55	79147.6	78629	0.10626	93.3217	49.0359	44.2857	3.61426	N/A
2608.56	79148.5	78629.8	0.10614	79.8585	49.1349	30.7236	2.50456	N/A
2608.57	79149.3	78630.7	0.10602	105.778	49.2588	56.5193	4.60225	N/A
2608.58	79150.1	78631.5	0.1059	104.932	49.4308	55.5016	4.51426	N/A
2608.59	79151	78632.3	0.10578	57.6472	49.548	8.09915	0.657996	16.9919
2608.6	79151.8	78633.2	0.10566	48.3898	49.6079	0	0	N/A
2608.61	79152.6	78634	0.10554	41.0374	49.6319	0	0	N/A
2608.62	79153.5	78634.9	0.10542	N/A	49.6319	N/A	N/A	N/A
2608.63	79154.3	78635.7	0.10529	N/A	49.7551	N/A	N/A	N/A
2608.64	79155.2	78636.5	0.10517	N/A	49.9549	N/A	N/A	N/A
2608.65	79156	78637.4	0.10505	N/A	50.0315	N/A	N/A	N/A
2608.66	79156.8	78638.2	0.10493	N/A	50.0315	N/A	N/A	N/A
2608.67	79157.7	78639	0.10481	23.8914	50.0315	0	0	N/A
2608.68	79158.5	78639.9	0.10469	28.6751	50.2335	0	0	N/A
2608.69	79159.3	78640.7	0.10457	35.9101	50.0315	0	0	N/A
2608.7	79160.2	78641.6	0.10444	55.7843	50.0315	0	0	N/A
2608.71	79161	78642.4	0.10432	48.97	50.0315	0	0	N/A
2608.72	79161.9	78643.2	0.1042	32.4384	49.9549	0	0	N/A
2608.73	79162.7	78644.1	0.10408	32.4678	50.0315	0	0	N/A
2608.74	79163.5	78644.9	0.10396	41.5907	50.0315	0	0	N/A
2608.75	79164.4	78645.7	0.10384	19.9517	50.0315	0	0	N/A
2608.76	79165.2	78646.6	0.10372	38.2584	50.0315	0	0	N/A
2608.77	79166	78647.4	0.1036	49.5839	50.0315	0	0	N/A
2608.78	79166.9	78648.3	0.10347	57.4293	49.9549	0	0	N/A
2608.79	79167.7	78649.1	0.10335	53.6185	49.7551	0	0	N/A
2608.8	79168.6	78649.9	0.10323	57.5192	49.7551	0	0	N/A
2608.81	79169.4	78650.8	0.10311	57.2423	49.7551	0	0	N/A
2608.82	79170.2	78651.6	0.10299	58.2472	49.9549	0	0	N/A
2608.83	79171.1	78652.4	0.10287	81.2984	49.8783	0	0	N/A
2608.84	79171.9	78653.3	0.10275	75.4221	49.9549	0	0	N/A
2608.85	79172.7	78654.1	0.10262	62.7244	50.0315	0	0	N/A
2608.86	79173.6	78655	0.1025	65.1726	50.0315	0	0	N/A
2608.87	79174.4	78655.8	0.10238	63.0534	50.0315	0	0	N/A
2608.88	79175.3	78656.6	0.10226	58.7623	50.0315	0	0	N/A
2608.89	79176.1	78657.5	0.10214	57.5277	50.0315	7.49628	0.58806	N/A
2608.9	79176.9	78658.3	0.10202	69.2093	50.0315	19.1779	1.50269	N/A
2608.91	79177.8	78659.1	0.1019	94.1335	50.2335	43.9	3.43577	N/A
2608.92	79178.6	78660	0.10177	88.9147	50.2335	38.6812	3.02346	N/A
2608.93	79179.4	78660.8	0.10165	67.1355	50.0315	17.104	1.33532	N/A
2608.94	79180.3	78661.7	0.10153	60.3389	49.9549	10.384	0.809738	10.695
2608.95	79181.1	78662.5	0.10141	51.7668	49.7551	0	0	N/A
2608.96	79182	78663.3	0.10129	53.0226	49.6319	0	0	N/A
2608.97	79182.8	78664.2	0.10117	54.2062	49.6319	0	0	N/A
2608.98	79183.6	78665	0.10105	56.3554	49.6319	0	0	N/A
2608.99	79184.5	78665.8	0.10093	55.2059	49.6319	0	0	N/A
2609	79185.3	78666.7	0.1008	52.847	49.6319	0	0	N/A
2609.01	79186.1	78667.5	0.10072	53.2187	49.7551	0	0	N/A
2609.02	79187	78668.4	0.10065	42.7387	49.9549	0	0	N/A
2609.03	79187.8	78669.2	0.10057	44.3196	49.9549	0	0	N/A
2609.04	79188.7	78670	0.10049	41.1523	49.9549	0	0	N/A
2609.05	79189.5	78670.9	0.10041	52.6242	49.9549	0	0	N/A
2609.06	79190.3	78671.7	0.10033	56.7746	49.9549	0	0	N/A
2609.07	79191.2	78672.5	0.10025	58.516	49.9549	0	0	N/A
2609.08	79192	78673.4	0.10017	58.7339	49.9549	0	0	N/A
2609.09	79192.8	78674.2	0.10009	57.7485	50.0315	0	0	N/A
2609.1	79193.7	78675.1	0.10001	73.9072	50.2335	0	0	N/A
2609.11	79194.5	78675.9	0.09993	59.7787	50.4518	0	0	N/A
2609.12	79195.4	78676.7	0.09985	50.6066	50.4518	0	0	N/A
2609.13	79196.2	78677.6	0.09977	48.6541	50.2335	0	0	N/A
2609.14	79197	78678.4	0.09969	50.4803	50.0315	0	0	N/A
2609.15	79197.9	78679.2	0.09961	52.878	50.2335	0	0	N/A
2609.16	79198.7	78680.1	0.09953	87.4395	50.4356	37.004	2.8287	N/A
2609.17	79199.5	78680.9	0.09945	116.395	50.4356	65.9596	5.03805	N/A
2609.18	79200.4	78681.8	0.09937	93.8662	50.468	43.3982	3.31217	11.1789
2609.19	79201.2	78682.6	0.0993	50.4356	50.4803	0	0	N/A
2609.2	79202.1	78683.4	0.09922	35.4184	50.511	0	0	N/A
2609.21	79202.9	78684.3	0.09914	41.0918	50.511	0	0	N/A
2609.22	79203.7	78685.1	0.09906	53.1207	50.511	0	0	N/A
2609.23	79204.6	78686	0.09898	70.0101	50.5588	0	0	N/A
2609.24	79205.4	78686.8	0.0989	55.8801	50.6066	0	0	N/A
2609.25	79206.2	78687.6	0.09882	50.7915	50.6066	0	0	N/A
2609.26	79207.1	78688.5	0.09874	59.8391	50.5588	0	0	N/A
2609.27	79207.9	78689.3	0.09866	60.9951	50.5588	0	0	N/A
2609.28	79208.8	78690.1	0.09858	49.168	50.5588	0	0	N/A
2609.29	79209.6	78691	0.0985	25.6714	50.511	0	0	N/A
2609.3	79210.4	78691.8	0.09842	29.4299	50.5588	0	0	N/A
2609.31	79211.3	78692.7	0.09834	50.468	50.5827	0	0	N/A
2609.32	79212.1	78693.5	0.09826	N/A	50.6066	N/A	N/A	N/A
2609.33	79212.9	78694.3	0.09818	N/A	50.6066	N/A	N/A	N/A
2609.34	79213.8	78695.2	0.0981	61.7134	50.6066	0	0	N/A
2609.35	79214.6	78696	0.09802	61.3676	50.6066	0	0	N/A
2609.36	79215.5	78696.8	0.09795	70.4997	50.6066	0	0	N/A
2609.37	79216.3	78697.7	0.09787	67.4216	50.6066	0	0	N/A
2609.38	79217.1	78698.5	0.09779	56.9133	50.6066	0	0	N/A
2609.39	79218	78699.4	0.09771	43.4292	50.6066	0	0	N/A
2609.4	79218.8	78700.2	0.09763	38.8521	50.6066	0	0	N/A
2609.41	79219.6	78701	0.09755	48.5213	50.6066	0	0	N/A
2609.42	79220.5	78701.9	0.09747	44.4504	50.6066	0	0	N/A
2609.43	79221.3	78702.7	0.09739	42.8958	50.6066	0	0	N/A
2609.44	79222.2	78703.5	0.09731	58.1739	50.6066	0	0	N/A
2609.45	79223	78704.4	0.09723	48.0063	50.6066	0	0	N/A
2609.46	79223.8	78705.2	0.09715	51.9304	50.5827	0	0	N/A
2609.47	79224.7	78706.1	0.09707	59.0743	50.5588	0	0	N/A
2609.48	79225.5	78706.9	0.09699	49.8783	50.5827	0	0	N/A
2609.49	79226.3	78707.7	0.09691	67.8649	50.6066	0	0	N/A
2609.5	79227.2	78708.6	0.09683	89.0016	50.6066	0	0	N/A
2609.51	79228	78709.4	0.09675	68.1426	50.6066	0	0	N/A
2609.52	79228.9	78710.2	0.09667	58.6479	50.6066	0	0	N/A
2609.53	79229.7	78711.1	0.0966	72.7536	50.6066	0	0	N/A
2609.54	79230.5	78711.9	0.09652	88.0341	50.6066	0	0	N/A
2609.55	79231.4	78712.8	0.09644	92.2519	50.6066	0	0	N/A
2609.56	79232.2	78713.6	0.09636	79.2653	50.6066	0	0	N/A
2609.57	79233	78714.4	0.09628	60.5505	50.5435	10.0071	0.739993	N/A
2609.58	79233.9	78715.3	0.0962	95.8521	50.5435	45.3086	3.34766	N/A
2609.59	79234.7	78716.1	0.09612	150.405	50.5435	99.8611	7.37208	N/A
2609.6	79235.6	78716.9	0.09604	96.5931	50.5435	46.0496	3.39675	14.8565
2609.61	79236.4	78717.8	0.09596	35.8212	50.4742	0	0	N/A
2609.62	79237.2	78718.6	0.09588	34.2626	50.4742	0	0	N/A
2609.63	79238.1	78719.5	0.0958	55.7518	50.5435	0	0	N/A
2609.64	79238.9	78720.3	0.09572	32.123	50.5435	0	0	N/A
2609.65	79239.7	78721.1	0.09564	38.4794	50.5435	0	0	N/A
2609.66	79240.6	78722	0.09556	51.4319	50.5435	0	0	N/A
2609.67	79241.4	78722.8	0.09548	52.376	50.5435	0	0	N/A
2609.68	79242.3	78723.6	0.0954	35.0316	50.5435	0	0	N/A
2609.69	79243.1	78724.5	0.09532	29.8453	50.4742	0	0	N/A
2609.7	79243.9	78725.3	0.09525	41.6774	50.4518	0	0	N/A
2609.71	79244.8	78726.2	0.09517	45.6807	50.1569	0	0	N/A
2609.72	79245.6	78727	0.09509	53.2141	49.5721	0	0	N/A
2609.73	79246.4	78727.8	0.09501	57.5249	49.217	8.30791	0.606242	N/A
2609.74	79247.3	78728.7	0.09493	112.814	49.1306	63.6831	4.64309	N/A
2609.75	79248.1	78729.5	0.09485	197.893	49.0344	148.859	10.8442	N/A
2609.76	79249	78730.3	0.09477	120.71	48.8752	71.8353	5.2287	21.3222
2609.77	79249.8	78731.2	0.09469	42.3454	48.7145	0	0	N/A
2609.78	79250.6	78732	0.09461	25.3845	48.5877	0	0	N/A
2609.79	79251.5	78732.9	0.09453	17.5133	48.403	0	0	N/A
2609.8	79252.3	78733.7	0.09445	15.458	48.2848	0	0	N/A
2609.81	79253.1	78734.5	0.09437	N/A	48.2848	N/A	N/A	N/A
2609.82	79254	78735.4	0.09429	17.6023	48.2848	0	0	N/A
2609.83	79254.8	78736.2	0.09421	20.0846	48.2848	0	0	N/A
2609.84	79255.7	78737	0.09413	18.7467	48.2848	0	0	N/A
2609.85	79256.5	78737.9	0.09405	19.8382	48.1455	0	0	N/A
2609.86	79257.3	78738.7	0.09397	28.1774	47.7047	0	0	N/A
2609.87	79258.2	78739.6	0.0939	35.1344	46.6306	0	0	N/A
2609.88	79259	78740.4	0.09382	45.2922	45.7693	0	0	N/A
2609.89	79259.8	78741.2	0.09374	49.266	45.5372	0	0	N/A
2609.9	79260.7	78742.1	0.09366	38.4694	45.3429	0	0	N/A
2609.91	79261.5	78742.9	0.09358	56.4689	45.2498	0	0	N/A
2609.92	79262.4	78743.7	0.0935	76.1752	45.2498	0	0	N/A
2609.93	79263.2	78744.6	0.09342	42.6775	45.2498	0	0	N/A
2609.94	79264	78745.4	0.09334	22.3869	45.2498	0	0	N/A
2609.95	79264.9	78746.3	0.09326	24.1518	45.2498	0	0	N/A
2609.96	79265.7	78747.1	0.09318	29.9505	45.1072	0	0	N/A
2609.97	79266.5	78747.9	0.0931	48.7748	44.8786	0	0	N/A
2609.98	79267.4	78748.8	0.09302	48.9756	44.6004	0	0	N/A
2609.99	79268.2	78749.6	0.09294	56.4479	44.3811	0	0	N/A
2610	79269.1	78750.4	0.09286	62.2652	44.2409	0	0	N/A
2610.01	79269.9	78751.3	0.09287	55.8227	44.2409	0	0	N/A
2610.02	79270.7	78752.1	0.09288	73.045	44.2409	0	0	N/A
2610.03	79271.6	78753	0.09289	45.0069	44.05	0	0	N/A
2610.04	79272.4	78753.8	0.0929	72.0062	44.05	27.9561	1.99468	N/A
2610.05	79273.3	78754.6	0.09291	88.3085	43.93	44.3785	3.1668	N/A
2610.06	79274.1	78755.5	0.09291	59.2977	43.8299	15.4678	1.10377	6.26524
2610.07	79274.9	78756.3	0.09292	41.003	43.7298	0	0	N/A
2610.08	79275.8	78757.1	0.09293	51.7788	43.5795	0	0	N/A
2610.09	79276.6	78758	0.09294	74.9062	43.4292	0	0	N/A
2610.1	79277.4	78758.8	0.09295	64.8851	43.351	0	0	N/A
2610.11	79278.3	78759.7	0.09296	51.0913	43.351	0	0	N/A
2610.12	79279.1	78760.5	0.09296	39.4262	43.351	0	0	N/A
2610.13	79280	78761.3	0.09297	60.8436	42.8958	0	0	N/A
2610.14	79280.8	78762.2	0.09298	61.1512	42.8958	0	0	N/A
2610.15	79281.6	78763	0.09299	44.7504	42.8958	0	0	N/A
2610.16	79282.5	78763.8	0.093	37.7288	42.8958	0	0	N/A
2610.17	79283.3	78764.7	0.09301	54.2863	42.8958	0	0	N/A
2610.18	79284.1	78765.5	0.09301	57.9094	42.8958	0	0	N/A
2610.19	79285	78766.4	0.09302	45.858	42.8155	0	0	N/A
2610.2	79285.8	78767.2	0.09303	67.4858	42.8155	0	0	N/A
2610.21	79286.7	78768	0.09304	51.2977	42.8155	8.48217	0.606125	N/A
2610.22	79287.5	78768.9	0.09305	66.9197	42.8155	24.1041	1.72261	N/A
2610.23	79288.3	78769.7	0.09306	84.1751	42.6775	41.4976	2.966	N/A
2610.24	79289.2	78770.5	0.09306	85.4762	42.3454	43.1308	3.08273	N/A
2610.25	79290	78771.4	0.09307	75.8753	42.3454	33.5299	2.39675	N/A
2610.26	79290.8	78772.2	0.09308	85.4606	42.3454	43.1152	3.08228	N/A
2610.27	79291.7	78773.1	0.09309	61.571	41.6774	19.8936	1.42233	15.2788
2610.28	79292.5	78773.9	0.0931	45.2075	41.4017	0	0	N/A
2610.29	79293.4	78774.7	0.09311	35.2959	41.4017	0	0	N/A
2610.3	79294.2	78775.6	0.09311	37.7318	41.1956	0	0	N/A
2610.31	79295	78776.4	0.09312	N/A	41.1956	N/A	N/A	N/A
2610.32	79295.9	78777.2	0.09313	18.3536	41.1956	0	0	N/A
2610.33	79296.7	78778.1	0.09314	27.3319	41.1956	0	0	N/A
2610.34	79297.5	78778.9	0.09315	25.1482	41.1268	0	0	N/A
2610.35	79298.4	78779.8	0.09316	33.4446	41.058	0	0	N/A
2610.36	79299.2	78780.6	0.09316	27.2844	41.0305	0	0	N/A
2610.37	79300.1	78781.4	0.09317	28.5991	41.003	0	0	N/A
2610.38	79300.9	78782.3	0.09318	52.0895	40.8929	0	0	N/A
2610.39	79301.7	78783.1	0.09319	65.2725	40.5936	0	0	N/A
2610.4	79302.6	78783.9	0.0932	53.0638	40.3151	0	0	N/A
2610.41	79303.4	78784.8	0.09321	32.3848	40.2955	0	0	N/A
2610.42	79304.2	78785.6	0.09321	22.1727	40.2618	0	0	N/A
2610.43	79305.1	78786.5	0.09322	23.2439	40.0204	0	0	N/A
2610.44	79305.9	78787.3	0.09323	38.3282	40.0204	0	0	N/A
2610.45	79306.8	78788.1	0.09324	63.7842	40.0204	0	0	N/A
2610.46	79307.6	78789	0.09325	55.7129	40.0204	0	0	N/A
2610.47	79308.4	78789.8	0.09326	34.0021	40.0204	0	0	N/A
2610.48	79309.3	78790.6	0.09327	43.93	40.1411	0	0	N/A
2610.49	79310.1	78791.5	0.09327	40.5936	40.2618	0	0	N/A
2610.5	79310.9	78792.3	0.09328	37.682	40.2786	0	0	N/A
2610.51	79311.8	78793.2	0.09329	34.7098	40.2955	0	0	N/A
2610.52	79312.6	78794	0.0933	43.351	40.3151	0	0	N/A
2610.53	79313.5	78794.8	0.09331	54.5411	40.5936	0	0	N/A
2610.54	79314.3	78795.7	0.09332	38.4498	40.3151	0	0	N/A
2610.55	79315.1	78796.5	0.09332	30.399	40.3151	0	0	N/A
2610.56	79316	78797.3	0.09333	28.2173	40.3151	0	0	N/A
2610.57	79316.8	78798.2	0.09334	49.0931	40.3151	0	0	N/A
2610.58	79317.6	78799	0.09335	45.3937	40.3151	0	0	N/A
2610.59	79318.5	78799.9	0.09336	36.4998	40.5936	0	0	N/A
2610.6	79319.3	78800.7	0.09337	47.4031	40.5936	0	0	N/A
2610.61	79320.2	78801.5	0.09337	48.2848	40.3151	0	0	N/A
2610.62	79321	78802.4	0.09338	39.0257	40.3151	0	0	N/A
2610.63	79321.8	78803.2	0.09339	31.2206	40.2955	0	0	N/A
2610.64	79322.7	78804	0.0934	37.3071	40.2786	0	0	N/A
2610.65	79323.5	78804.9	0.09341	35.8664	40.2955	0	0	N/A
2610.66	79324.3	78805.7	0.09342	38.3381	40.3053	0	0	N/A
2610.67	79325.2	78806.6	0.09342	44.17	40.3151	0	0	N/A
2610.68	79326	78807.4	0.09343	40.8929	40.3151	0	0	N/A
2610.69	79326.9	78808.2	0.09344	23.2835	40.5936	0	0	N/A
2610.7	79327.7	78809.1	0.09345	40.2618	40.8929	0	0	N/A
2610.71	79328.5	78809.9	0.09346	78.0879	41.003	37.0849	2.662	N/A
2610.72	79329.4	78810.7	0.09347	87.2041	41.003	46.2011	3.31673	N/A
2610.73	79330.2	78811.6	0.09347	116.831	41.058	75.7732	5.43962	N/A
2610.74	79331	78812.4	0.09348	80.5363	41.1956	39.3407	2.82453	14.2429
2610.75	79331.9	78813.3	0.09349	44.3118	41.4017	0	0	N/A
2610.76	79332.7	78814.1	0.0935	28.9934	42.2054	0	0	N/A
2610.77	79333.6	78814.9	0.09351	21.1105	42.4188	0	0	N/A
2610.78	79334.4	78815.8	0.09352	28.1292	42.6775	0	0	N/A
2610.79	79335.2	78816.6	0.09352	28.4621	42.6775	0	0	N/A
2610.8	79336.1	78817.4	0.09353	30.0148	42.6775	0	0	N/A
2610.81	79336.9	78818.3	0.09354	40.0204	42.6775	0	0	N/A
2610.82	79337.7	78819.1	0.09355	53.2311	42.4188	0	0	N/A
2610.83	79338.6	78820	0.09356	43.7298	42.4188	0	0	N/A
2610.84	79339.4	78820.8	0.09357	22.2078	42.4188	0	0	N/A
2610.85	79340.3	78821.6	0.09357	21.4972	42.8155	0	0	N/A
2610.86	79341.1	78822.5	0.09358	22.1974	42.8155	0	0	N/A
2610.87	79341.9	78823.3	0.09359	25.5327	43.351	0	0	N/A
2610.88	79342.8	78824.1	0.0936	35.5953	43.351	0	0	N/A
2610.89	79343.6	78825	0.09361	33.4465	42.8155	0	0	N/A
2610.9	79344.4	78825.8	0.09362	38.815	42.4188	0	0	N/A
2610.91	79345.3	78826.7	0.09363	49.1149	42.2054	0	0	N/A
2610.92	79346.1	78827.5	0.09363	50.1184	42.2054	0	0	N/A
2610.93	79347	78828.3	0.09364	40.3151	42.2054	0	0	N/A
2610.94	79347.8	78829.2	0.09365	44.7499	42.2054	0	0	N/A
2610.95	79348.6	78830	0.09366	41.1956	42.3121	0	0	N/A
2610.96	79349.5	78830.8	0.09367	42.8155	42.4188	0	0	N/A
2610.97	79350.3	78831.7	0.09368	33.6269	42.6172	0	0	N/A
2610.98	79351.1	78832.5	0.09368	30.5143	42.9441	0	0	N/A
2610.99	79352	78833.4	0.09369	35.092	42.9441	0	0	N/A
2611	79352.8	78834.2	0.0937	37.4531	42.9441	0	0	N/A
2611.01	79353.7	78835	0.09373	38.708	42.9441	0	0	N/A
2611.02	79354.5	78835.9	0.09376	39.2878	42.9441	0	0	N/A
2611.03	79355.3	78836.7	0.09379	41.4017	43.0904	0	0	N/A
2611.04	79356.2	78837.5	0.09382	43.8201	43.0904	0	0	N/A
2611.05	79357	78838.4	0.09385	63.1369	43.0904	0	0	N/A
2611.06	79357.8	78839.2	0.09388	49.5761	43.0904	0	0	N/A
2611.07	79358.7	78840.1	0.09391	44.0238	43.2295	0	0	N/A
2611.08	79359.5	78840.9	0.09394	52.3872	43.0904	0	0	N/A
2611.09	79360.4	78841.7	0.09397	37.0107	43.0904	0	0	N/A
2611.1	79361.2	78842.6	0.094	40.2955	43.0904	0	0	N/A
2611.11	79362	78843.4	0.09403	35.9585	43.0904	0	0	N/A
2611.12	79362.9	78844.2	0.09406	45.8729	43.108	0	0	N/A
2611.13	79363.7	78845.1	0.09409	36.9328	43.2295	0	0	N/A
2611.14	79364.5	78845.9	0.09412	39.537	43.351	0	0	N/A
2611.15	79365.4	78846.8	0.09414	57.7704	43.438	0	0	N/A
2611.16	79366.2	78847.6	0.09417	61.2178	43.525	0	0	N/A
2611.17	79367.1	78848.4	0.0942	36.4851	43.6274	0	0	N/A
2611.18	79367.9	78849.3	0.09423	41.058	43.7298	0	0	N/A
2611.19	79368.7	78850.1	0.09426	44.0942	43.7298	0	0	N/A
2611.2	79369.6	78850.9	0.09429	34.1053	43.8201	0	0	N/A
2611.21	79370.4	78851.8	0.09432	38.866	43.93	0	0	N/A
2611.22	79371.2	78852.6	0.09435	44.3581	43.93	0	0	N/A
2611.23	79372.1	78853.5	0.09438	43.525	44.0238	0	0	N/A
2611.24	79372.9	78854.3	0.09441	55.8091	44.0238	11.7852	0.854559	N/A
2611.25	79373.8	78855.1	0.09444	75.3014	44.059	31.2423	2.2661	N/A
2611.26	79374.6	78856	0.09447	96.6816	44.0942	52.5874	3.81558	N/A
2611.27	79375.4	78856.8	0.0945	58.6339	44.1321	14.5018	1.05254	7.98879
2611.28	79376.3	78857.6	0.09453	39.3645	44.17	0	0	N/A
2611.29	79377.1	78858.5	0.09456	33.6735	44.1321	0	0	N/A
2611.3	79377.9	78859.3	0.09459	35.0565	44.0942	0	0	N/A
2611.31	79378.8	78860.2	0.09462	25.1614	44.059	0	0	N/A
2611.32	79379.6	78861	0.09465	23.4525	44.0942	0	0	N/A
2611.33	79380.5	78861.8	0.09468	33.3928	44.1321	0	0	N/A
2611.34	79381.3	78862.7	0.09471	N/A	44.17	N/A	N/A	N/A
2611.35	79382.1	78863.5	0.09474	N/A	44.1826	N/A	N/A	N/A
2611.36	79383	78864.3	0.09477	N/A	44.1826	N/A	N/A	N/A
2611.37	79383.8	78865.2	0.0948	N/A	44.1321	N/A	N/A	N/A
2611.38	79384.6	78866	0.09483	N/A	44.1321	N/A	N/A	N/A
2611.39	79385.5	78866.9	0.09486	N/A	44.1321	N/A	N/A	N/A
2611.4	79386.3	78867.7	0.09489	N/A	44.1321	N/A	N/A	N/A
2611.41	79387.2	78868.5	0.09491	N/A	44.1826	N/A	N/A	N/A
2611.42	79388	78869.4	0.09494	N/A	44.2475	N/A	N/A	N/A
2611.43	79388.8	78870.2	0.09497	42.2054	44.3059	0	0	N/A
2611.44	79389.7	78871.1	0.095	34.7193	44.3059	0	0	N/A
2611.45	79390.5	78871.9	0.09503	37.0937	44.3118	0	0	N/A
2611.46	79391.3	78872.7	0.09506	40.083	44.3118	0	0	N/A
2611.47	79392.2	78873.6	0.09509	50.0287	44.3118	0	0	N/A
2611.48	79393	78874.4	0.09512	56.3356	44.3118	0	0	N/A
2611.49	79393.9	78875.2	0.09515	45.7083	44.3118	0	0	N/A
2611.5	79394.7	78876.1	0.09518	33.2708	44.3118	0	0	N/A
2611.51	79395.5	78876.9	0.09521	34.2223	44.3118	0	0	N/A
2611.52	79396.4	78877.8	0.09524	50.5966	44.3118	0	0	N/A
2611.53	79397.2	78878.6	0.09527	39.9595	44.3118	0	0	N/A
2611.54	79398	78879.4	0.0953	39.3071	44.3118	0	0	N/A
2611.55	79398.9	78880.3	0.09533	42.4188	44.3118	0	0	N/A
2611.56	79399.7	78881.1	0.09536	51.9936	44.3118	0	0	N/A
2611.57	79400.6	78881.9	0.09539	57.1876	44.3118	0	0	N/A
2611.58	79401.4	78882.8	0.09542	44.3409	44.3118	0	0	N/A
2611.59	79402.2	78883.6	0.09545	N/A	44.3263	N/A	N/A	N/A
2611.6	79403.1	78884.5	0.09548	44.1951	44.3409	0	0	N/A
2611.61	79403.9	78885.3	0.09551	44.5441	44.3409	0	0	N/A
2611.62	79404.7	78886.1	0.09554	50.6418	44.3409	0	0	N/A
2611.63	79405.6	78887	0.09557	50.9141	44.3409	0	0	N/A
2611.64	79406.4	78887.8	0.0956	50.1435	44.3409	0	0	N/A
2611.65	79407.3	78888.6	0.09563	48.7596	44.3409	0	0	N/A
2611.66	79408.1	78889.5	0.09566	48.7236	44.3409	0	0	N/A
2611.67	79408.9	78890.3	0.09568	54.8734	44.3409	0	0	N/A
2611.68	79409.8	78891.2	0.09571	62.3674	44.3409	0	0	N/A
2611.69	79410.6	78892	0.09574	65.3242	44.3409	0	0	N/A
2611.7	79411.4	78892.8	0.09577	45.0792	44.3409	0	0	N/A
2611.71	79412.3	78893.7	0.0958	35.6448	44.3409	0	0	N/A
2611.72	79413.1	78894.5	0.09583	38.0044	44.3581	0	0	N/A
2611.73	79414	78895.3	0.09586	49.9387	44.3581	0	0	N/A
2611.74	79414.8	78896.2	0.09589	48.7763	44.3581	0	0	N/A
2611.75	79415.6	78897	0.09592	44.8423	44.5441	0	0	N/A
2611.76	79416.5	78897.9	0.09595	41.5417	44.5441	0	0	N/A
2611.77	79417.3	78898.7	0.09598	55.5485	44.5441	0	0	N/A
2611.78	79418.1	78899.5	0.09601	45.9445	44.5441	0	0	N/A
2611.79	79419	78900.4	0.09604	39.1597	44.5441	0	0	N/A
2611.8	79419.8	78901.2	0.09607	37.6488	44.5441	0	0	N/A
2611.81	79420.7	78902	0.0961	31.8914	44.5441	0	0	N/A
2611.82	79421.5	78902.9	0.09613	43.108	44.3581	0	0	N/A
2611.83	79422.3	78903.7	0.09616	43.0727	44.3581	0	0	N/A
2611.84	79423.2	78904.6	0.09619	49.4748	44.3581	0	0	N/A
2611.85	79424	78905.4	0.09622	58.1428	44.3409	0	0	N/A
2611.86	79424.8	78906.2	0.09625	49.5305	44.3409	0	0	N/A
2611.87	79425.7	78907.1	0.09628	45.5083	44.3409	0	0	N/A
2611.88	79426.5	78907.9	0.09631	45.6588	44.3409	0	0	N/A
2611.89	79427.4	78908.7	0.09634	59.7761	44.3409	0	0	N/A
2611.9	79428.2	78909.6	0.09637	70.8524	44.3409	0	0	N/A
2611.91	79429	78910.4	0.0964	N/A	44.3409	N/A	N/A	N/A
2611.92	79429.9	78911.3	0.09643	44.3	44.3409	0	0	N/A
2611.93	79430.7	78912.1	0.09645	45.4305	44.3409	0	0	N/A
2611.94	79431.5	78912.9	0.09648	47.421	44.3409	0	0	N/A
2611.95	79432.4	78913.8	0.09651	N/A	44.3409	N/A	N/A	N/A
2611.96	79433.2	78914.6	0.09654	54.5914	44.3409	0	0	N/A
2611.97	79434.1	78915.4	0.09657	49.4431	44.3409	0	0	N/A
2611.98	79434.9	78916.3	0.0966	42.8203	44.3409	0	0	N/A
2611.99	79435.7	78917.1	0.09663	52.6376	44.3409	0	0	N/A
2612	79436.6	78918	0.09666	59.1003	44.3409	0	0	N/A
2612.01	79437.4	78918.8	0.09666	54.308	44.3495	0	0	N/A
2612.02	79438.2	78919.6	0.09665	55.1009	44.3581	0	0	N/A
2612.03	79439.1	78920.5	0.09664	54.6727	44.3495	0	0	N/A
2612.04	79439.9	78921.3	0.09663	48.9211	44.3581	0	0	N/A
2612.05	79440.8	78922.1	0.09663	53.6344	44.3581	0	0	N/A
2612.06	79441.6	78923	0.09662	49.4731	44.3409	0	0	N/A
2612.07	79442.4	78923.8	0.09661	51.7247	44.3409	0	0	N/A
2612.08	79443.3	78924.7	0.09661	49.9469	44.3581	0	0	N/A
2612.09	79444.1	78925.5	0.0966	54.8555	44.3581	0	0	N/A
2612.1	79444.9	78926.3	0.09659	71.4587	44.5441	0	0	N/A
2612.11	79445.8	78927.2	0.09659	57.1597	44.8423	0	0	N/A
2612.12	79446.6	78928	0.09658	51.8853	44.9406	0	0	N/A
2612.13	79447.5	78928.8	0.09657	51.1631	44.9467	0	0	N/A
2612.14	79448.3	78929.7	0.09656	43.6311	44.9467	0	0	N/A
2612.15	79449.1	78930.5	0.09656	63.0711	44.9437	18.1275	1.34436	N/A
2612.16	79450	78931.4	0.09655	127.057	44.9406	82.1161	6.08928	N/A
2612.17	79450.8	78932.2	0.09654	163.506	44.8915	118.614	8.79488	N/A
2612.18	79451.6	78933	0.09654	152.76	44.8423	107.917	8.00164	N/A
2612.19	79452.5	78933.9	0.09653	127.871	44.8423	83.0289	6.15569	N/A
2612.2	79453.3	78934.7	0.09652	114.476	44.8423	69.6333	5.16202	N/A
2612.21	79454.2	78935.5	0.09652	114.573	44.8423	69.7306	5.16917	N/A
2612.22	79455	78936.4	0.09651	102.118	44.8423	57.2755	4.24547	N/A
2612.23	79455.8	78937.2	0.0965	72.6407	44.8423	27.7984	2.04747	N/A
2612.24	79456.7	78938	0.09649	70.0214	44.8423	25.1792	1.85434	N/A
2612.25	79457.5	78938.9	0.09649	63.222	44.9406	18.2813	1.34636	50.2107
2612.26	79458.3	78939.7	0.09648	44.9467	44.9467	0	0	N/A
2612.27	79459.2	78940.5	0.09647	35.7169	44.9467	0	0	N/A
2612.28	79460	78941.4	0.09647	34.3058	44.9467	0	0	N/A
2612.29	79460.8	78942.2	0.09646	34.5505	44.9467	0	0	N/A
2612.3	79461.7	78943	0.09645	40.0298	45.0541	0	0	N/A
2612.31	79462.5	78943.9	0.09645	57.8748	45.0792	0	0	N/A
2612.32	79463.3	78944.7	0.09644	63.4466	45.0792	0	0	N/A
2612.33	79464.2	78945.5	0.09643	60.3524	45.4305	0	0	N/A
2612.34	79465	78946.4	0.09642	73.4721	45.4305	0	0	N/A
2612.35	79465.8	78947.2	0.09642	47.22	45.5083	0	0	N/A
2612.36	79466.7	78948	0.09641	65.2752	45.6588	0	0	N/A
2612.37	79467.5	78948.9	0.0964	71.1919	45.7083	0	0	N/A
2612.38	79468.3	78949.7	0.0964	45.0541	45.7083	0	0	N/A
2612.39	79469.1	78950.5	0.09639	42.9759	45.6588	0	0	N/A
2612.4	79470	78951.4	0.09638	50.9214	45.5083	0	0	N/A
2612.41	79470.8	78952.2	0.09638	40.5113	45.5083	0	0	N/A
2612.42	79471.6	78953	0.09637	29.2863	45.5083	0	0	N/A
2612.43	79472.5	78953.9	0.09636	33.2923	45.4694	0	0	N/A
2612.44	79473.3	78954.7	0.09636	34.6841	45.5083	0	0	N/A
2612.45	79474.1	78955.5	0.09635	44.9406	45.5835	0	0	N/A
2612.46	79475	78956.4	0.09634	76.8024	45.6588	0	0	N/A
2612.47	79475.8	78957.2	0.09633	67.6059	45.5835	0	0	N/A
2612.48	79476.6	78958	0.09633	60.2158	45.4694	0	0	N/A
2612.49	79477.5	78958.9	0.09632	70.133	45.4694	0	0	N/A
2612.5	79478.3	78959.7	0.09631	50.9149	45.4694	0	0	N/A
2612.51	79479.1	78960.5	0.09631	39.2128	45.4694	0	0	N/A
2612.52	79480	78961.3	0.0963	214.188	45.4694	168.718	12.4011	N/A
2612.53	79480.8	78962.2	0.09629	263.739	45.2549	218.484	16.0572	N/A
2612.54	79481.6	78963	0.09629	185.724	45.2549	140.469	10.3235	N/A
2612.55	79482.5	78963.8	0.09628	179.611	45.0666	134.544	9.88714	N/A
2612.56	79483.3	78964.7	0.09627	181.68	45.0004	136.679	10.043	N/A
2612.57	79484.1	78965.5	0.09626	295.835	45.0004	250.834	18.4288	N/A
2612.58	79485	78966.3	0.09626	360.975	45.0004	315.975	23.215	N/A
2612.59	79485.8	78967.2	0.09625	160.435	44.9437	115.491	8.48435	N/A
2612.6	79486.6	78968	0.09624	56.2194	44.8915	11.328	0.832096	109.672
2612.61	79487.5	78968.8	0.09624	42.1382	44.5711	0	0	N/A
2612.62	79488.3	78969.7	0.09623	52.9304	44.5711	0	0	N/A
2612.63	79489.1	78970.5	0.09622	56.271	44.5711	0	0	N/A
2612.64	79490	78971.3	0.09622	53.509	44.2802	0	0	N/A
2612.65	79490.8	78972.2	0.09621	64.6511	43.9458	0	0	N/A
2612.66	79491.6	78973	0.0962	42.3275	43.3696	0	0	N/A
2612.67	79492.5	78973.8	0.09619	37.8249	43.3696	0	0	N/A
2612.68	79493.3	78974.7	0.09619	42.2672	43.0904	0	0	N/A
2612.69	79494.1	78975.5	0.09618	30.5608	43.0904	0	0	N/A
2612.7	79495	78976.3	0.09617	37.3677	43.3696	0	0	N/A
2612.71	79495.8	78977.2	0.09617	27.727	43.3696	0	0	N/A
2612.72	79496.6	78978	0.09616	25.4641	43.3696	0	0	N/A
2612.73	79497.4	78978.8	0.09615	18.247	43.9458	0	0	N/A
2612.74	79498.3	78979.7	0.09615	23.318	44.2802	0	0	N/A
2612.75	79499.1	78980.5	0.09614	16.6184	44.2802	0	0	N/A
2612.76	79499.9	78981.3	0.09613	18.3628	44.2802	0	0	N/A
2612.77	79500.8	78982.2	0.09612	32.808	43.9458	0	0	N/A
2612.78	79501.6	78983	0.09612	33.1347	43.5575	0	0	N/A
2612.79	79502.4	78983.8	0.09611	33.4981	43.5575	0	0	N/A
2612.8	79503.3	78984.7	0.0961	30.3484	43.3697	0	0	N/A
2612.81	79504.1	78985.5	0.0961	38.6315	43.1157	0	0	N/A
2612.82	79504.9	78986.3	0.09609	30.1851	43.1157	0	0	N/A
2612.83	79505.8	78987.2	0.09608	24.8891	43.1157	0	0	N/A
2612.84	79506.6	78988	0.09608	24.5311	43.1157	0	0	N/A
2612.85	79507.4	78988.8	0.09607	30.5824	43.1157	0	0	N/A
2612.86	79508.3	78989.6	0.09606	81.3587	43.1157	0	0	N/A
2612.87	79509.1	78990.5	0.09606	50.2586	43.1157	0	0	N/A
2612.88	79509.9	78991.3	0.09605	41.8393	43.1157	0	0	N/A
2612.89	79510.8	78992.1	0.09604	36.985	43.3697	0	0	N/A
2612.9	79511.6	78993	0.09603	48.8889	43.3697	0	0	N/A
2612.91	79512.4	78993.8	0.09603	85.2131	43.3697	41.8433	3.06693	N/A
2612.92	79513.3	78994.6	0.09602	139.637	43.3697	96.2671	7.05512	N/A
2612.93	79514.1	78995.5	0.09601	135.385	43.1157	92.2689	6.76148	N/A
2612.94	79514.9	78996.3	0.09601	77.287	42.9726	34.3144	2.51456	19.3981
2612.95	79515.8	78997.1	0.096	39.5231	42.9467	0	0	N/A
2612.96	79516.6	78998	0.09599	34.5239	42.7913	0	0	N/A
2612.97	79517.4	78998.8	0.09599	52.5848	42.7913	0	0	N/A
2612.98	79518.3	78999.6	0.09598	67.1832	42.5408	0	0	N/A
2612.99	79519.1	79000.5	0.09597	81.651	42.3752	0	0	N/A
2613	79519.9	79001.3	0.09596	72.3827	42.3752	0	0	N/A
2613.01	79520.8	79002.1	0.09597	62.1771	42.3752	0	0	N/A
2613.02	79521.6	79003	0.09598	51.2353	42.3752	0	0	N/A
2613.03	79522.4	79003.8	0.09599	46.266	42.3752	0	0	N/A
2613.04	79523.3	79004.6	0.096	38.0762	42.3752	0	0	N/A
2613.05	79524.1	79005.5	0.09601	40.0808	42.3752	0	0	N/A
2613.06	79524.9	79006.3	0.09601	36.8629	42.3275	0	0	N/A
2613.07	79525.7	79007.1	0.09602	31.3304	42.2973	0	0	N/A
2613.08	79526.6	79008	0.09603	39.8364	42.2672	0	0	N/A
2613.09	79527.4	79008.8	0.09604	42.1966	42.2973	0	0	N/A
2613.1	79528.2	79009.6	0.09605	42.924	42.3275	0	0	N/A
2613.11	79529.1	79010.5	0.09605	41.8889	42.3752	0	0	N/A
2613.12	79529.9	79011.3	0.09606	41.0954	42.423	0	0	N/A
2613.13	79530.7	79012.1	0.09607	31.9764	42.3752	0	0	N/A
2613.14	79531.6	79013	0.09608	35.1989	42.3275	0	0	N/A
2613.15	79532.4	79013.8	0.09609	69.3139	42.2973	0	0	N/A
2613.16	79533.2	79014.6	0.09609	69.7979	42.3275	0	0	N/A
2613.17	79534.1	79015.5	0.0961	42.6586	42.2672	0	0	N/A
2613.18	79534.9	79016.3	0.09611	23.1484	42.2672	0	0	N/A
2613.19	79535.7	79017.1	0.09612	30.2615	42.2672	0	0	N/A
2613.2	79536.6	79017.9	0.09613	60.4381	42.2973	0	0	N/A
2613.21	79537.4	79018.8	0.09614	72.0162	42.3275	0	0	N/A
2613.22	79538.2	79019.6	0.09614	56.626	42.2973	0	0	N/A
2613.23	79539.1	79020.4	0.09615	53.4755	42.2672	0	0	N/A
2613.24	79539.9	79021.3	0.09616	38.9394	42.2672	0	0	N/A
2613.25	79540.7	79022.1	0.09617	49.8989	42.1966	0	0	N/A
2613.26	79541.6	79022.9	0.09618	60.0559	42.1382	0	0	N/A
2613.27	79542.4	79023.8	0.09618	52.3795	42.1091	0	0	N/A
2613.28	79543.2	79024.6	0.09619	55.0347	42.1091	0	0	N/A
2613.29	79544.1	79025.4	0.0962	34.187	42.009	0	0	N/A
2613.3	79544.9	79026.3	0.09621	31.3958	41.9089	0	0	N/A
2613.31	79545.7	79027.1	0.09622	30.7875	41.8989	0	0	N/A
2613.32	79546.6	79027.9	0.09623	29.3897	41.9089	0	0	N/A
2613.33	79547.4	79028.8	0.09623	54.0306	42.009	12.0215	0.882959	N/A
2613.34	79548.2	79029.6	0.09624	114.195	42.1237	72.0713	5.29399	N/A
2613.35	79549.1	79030.4	0.09625	138.034	42.1237	95.9101	7.04588	N/A
2613.36	79549.9	79031.3	0.09626	153.249	42.009	111.24	8.17285	N/A
2613.37	79550.7	79032.1	0.09627	69.2022	41.8989	27.3032	2.0062	23.4019
2613.38	79551.6	79032.9	0.09627	31.0118	41.8641	0	0	N/A
2613.39	79552.4	79033.8	0.09628	28.3377	41.8641	0	0	N/A
2613.4	79553.2	79034.6	0.09629	24.0764	41.4869	0	0	N/A
2613.41	79554	79035.4	0.0963	25.3495	41.115	0	0	N/A
2613.42	79554.9	79036.3	0.09631	30.4504	41.115	0	0	N/A
2613.43	79555.7	79037.1	0.09631	37.7236	41.1346	0	0	N/A
2613.44	79556.5	79037.9	0.09632	47.9024	41.115	0	0	N/A
2613.45	79557.4	79038.8	0.09633	41.9089	41.0954	0	0	N/A
2613.46	79558.2	79039.6	0.09634	44.2605	41.115	0	0	N/A
2613.47	79559	79040.4	0.09635	51.9342	41.1346	0	0	N/A
2613.48	79559.9	79041.3	0.09636	60.8593	41.3633	0	0	N/A
2613.49	79560.7	79042.1	0.09636	36.1526	41.1346	0	0	N/A
2613.5	79561.5	79042.9	0.09637	21.2966	41.115	0	0	N/A
2613.51	79562.4	79043.8	0.09638	31.1901	41.1346	0	0	N/A
2613.52	79563.2	79044.6	0.09639	33.0401	41.115	0	0	N/A
2613.53	79564	79045.4	0.0964	18.0044	41.0954	0	0	N/A
2613.54	79564.9	79046.2	0.0964	13.4126	40.859	0	0	N/A
2613.55	79565.7	79047.1	0.09641	31.8072	40.5524	0	0	N/A
2613.56	79566.5	79047.9	0.09642	33.1566	40.3749	0	0	N/A
2613.57	79567.4	79048.7	0.09643	21.7588	40.2418	0	0	N/A
2613.58	79568.2	79049.6	0.09644	21.9108	40.3749	0	0	N/A
2613.59	79569	79050.4	0.09645	46.5472	40.3749	0	0	N/A
2613.6	79569.9	79051.2	0.09645	46.7808	40.5524	0	0	N/A
2613.61	79570.7	79052.1	0.09646	31.7432	40.859	0	0	N/A
2613.62	79571.5	79052.9	0.09647	40.6225	40.859	0	0	N/A
2613.63	79572.4	79053.7	0.09648	51.2458	40.859	0	0	N/A
2613.64	79573.2	79054.6	0.09649	60.8441	40.859	0	0	N/A
2613.65	79574	79055.4	0.09649	66.5477	40.859	0	0	N/A
2613.66	79574.9	79056.2	0.0965	51.6044	41.115	0	0	N/A
2613.67	79575.7	79057.1	0.09651	43.4839	41.115	0	0	N/A
2613.68	79576.5	79057.9	0.09652	38.1131	41.3633	0	0	N/A
2613.69	79577.4	79058.7	0.09653	44.6323	41.7157	0	0	N/A
2613.7	79578.2	79059.6	0.09653	43.2556	41.7157	0	0	N/A
2613.71	79579	79060.4	0.09654	42.423	41.7157	0	0	N/A
2613.72	79579.9	79061.2	0.09655	54.2797	41.7157	0	0	N/A
2613.73	79580.7	79062.1	0.09656	49.6762	41.7157	0	0	N/A
2613.74	79581.5	79062.9	0.09657	46.5702	41.7157	0	0	N/A
2613.75	79582.3	79063.7	0.09658	60.5692	41.7157	0	0	N/A
2613.76	79583.2	79064.6	0.09658	52.6998	41.8641	0	0	N/A
2613.77	79584	79065.4	0.09659	51.7992	41.8641	0	0	N/A
2613.78	79584.8	79066.2	0.0966	69.8591	41.8641	0	0	N/A
2613.79	79585.7	79067.1	0.09661	60.8484	41.8989	0	0	N/A
2613.8	79586.5	79067.9	0.09662	46.1886	41.8989	0	0	N/A
2613.81	79587.3	79068.7	0.09662	45.1339	41.7405	0	0	N/A
2613.82	79588.2	79069.6	0.09663	47.0844	41.8889	0	0	N/A
2613.83	79589	79070.4	0.09664	42.1091	41.8989	0	0	N/A
2613.84	79589.8	79071.2	0.09665	42.9694	41.9089	0	0	N/A
2613.85	79590.7	79072.1	0.09666	32.4334	42.009	0	0	N/A
2613.86	79591.5	79072.9	0.09667	40.0852	42.1529	0	0	N/A
2613.87	79592.3	79073.7	0.09667	47.6938	42.2791	0	0	N/A
2613.88	79593.2	79074.5	0.09668	37.1176	42.2791	0	0	N/A
2613.89	79594	79075.4	0.09669	30.8174	42.2791	0	0	N/A
2613.9	79594.8	79076.2	0.0967	44.2476	42.2791	0	0	N/A
2613.91	79595.7	79077	0.09671	51.8047	42.2791	0	0	N/A
2613.92	79596.5	79077.9	0.09671	43.0447	42.2791	0	0	N/A
2613.93	79597.3	79078.7	0.09672	43.2763	42.2791	0	0	N/A
2613.94	79598.2	79079.5	0.09673	59.313	42.2791	0	0	N/A
2613.95	79599	79080.4	0.09674	48.9859	42.3923	0	0	N/A
2613.96	79599.8	79081.2	0.09675	29.5283	42.4971	0	0	N/A
2613.97	79600.7	79082	0.09676	32.8934	42.5712	0	0	N/A
2613.98	79601.5	79082.9	0.09676	37.1931	42.5712	0	0	N/A
2613.99	79602.3	79083.7	0.09677	49.6116	42.5712	0	0	N/A
2614	79603.2	79084.5	0.09678	72.556	42.5712	0	0	N/A
2614.01	79604	79085.4	0.09679	75.9193	42.5712	0	0	N/A
2614.02	79604.8	79086.2	0.09681	59.6068	42.5712	0	0	N/A
2614.03	79605.7	79087	0.09682	40.2674	42.5712	0	0	N/A
2614.04	79606.5	79087.9	0.09684	39.9703	42.5712	0	0	N/A
2614.05	79607.3	79088.7	0.09686	40.1475	42.5712	0	0	N/A
2614.06	79608.1	79089.5	0.09687	45.1006	42.5712	0	0	N/A
2614.07	79609	79090.4	0.09689	28.9687	42.5712	0	0	N/A
2614.08	79609.8	79091.2	0.0969	32.2935	42.5712	0	0	N/A
2614.09	79610.6	79092	0.09692	40.2162	42.5712	0	0	N/A
2614.1	79611.5	79092.9	0.09693	67.4146	42.5712	24.8434	1.83795	N/A
2614.11	79612.3	79093.7	0.09695	162.029	42.5321	119.497	8.84252	N/A
2614.12	79613.1	79094.5	0.09696	176.251	42.458	133.793	9.90137	N/A
2614.13	79614	79095.4	0.09698	110.647	42.3923	68.2543	5.05216	25.634
2614.14	79614.8	79096.2	0.09699	47.1163	42.3615	0	0	N/A
2614.15	79615.6	79097	0.09701	25.0452	42.3615	0	0	N/A
2614.16	79616.5	79097.9	0.09702	33.5197	42.329	0	0	N/A
2614.17	79617.3	79098.7	0.09704	41.1346	42.329	0	0	N/A
2614.18	79618.1	79099.5	0.09705	45.1054	42.2965	0	0	N/A
2614.19	79619	79100.4	0.09707	55.7091	42.2028	13.5063	1.00066	N/A
2614.2	79619.8	79101.2	0.09708	76.2378	42.2028	34.035	2.52189	N/A
2614.21	79620.6	79102	0.0971	84.3676	42.2965	42.0711	3.11794	N/A
2614.22	79621.5	79102.8	0.09711	93.6315	42.329	51.3025	3.80253	N/A
2614.23	79622.3	79103.7	0.09713	59.9696	42.3615	17.6081	1.30537	11.7484
2614.24	79623.1	79104.5	0.09714	45.9863	42.3615	0	0	N/A
2614.25	79624	79105.3	0.09716	38.2113	42.3923	0	0	N/A
2614.26	79624.8	79106.2	0.09717	21.7209	42.3615	0	0	N/A
2614.27	79625.6	79107	0.09719	15.4924	42.3615	0	0	N/A
2614.28	79626.5	79107.8	0.0972	35.5434	42.3615	0	0	N/A
2614.29	79627.3	79108.7	0.09722	52.773	42.3615	0	0	N/A
2614.3	79628.1	79109.5	0.09723	35.1149	42.3615	0	0	N/A
2614.31	79629	79110.3	0.09725	20.8591	42.3615	0	0	N/A
2614.32	79629.8	79111.2	0.09726	37.3369	42.3615	0	0	N/A
2614.33	79630.6	79112	0.09728	44.2208	42.3615	0	0	N/A
2614.34	79631.5	79112.8	0.09729	40.4824	42.3615	0	0	N/A
2614.35	79632.3	79113.7	0.09731	31.022	42.2965	0	0	N/A
2614.36	79633.1	79114.5	0.09732	41.5921	42.3615	0	0	N/A
2614.37	79634	79115.3	0.09734	51.9401	42.3615	0	0	N/A
2614.38	79634.8	79116.2	0.09735	52.7001	42.3615	0	0	N/A
2614.39	79635.6	79117	0.09737	39.5057	42.2965	0	0	N/A
2614.4	79636.4	79117.8	0.09738	37.6918	42.3615	0	0	N/A
2614.41	79637.3	79118.7	0.0974	42.5712	42.3615	0	0	N/A
2614.42	79638.1	79119.5	0.09742	51.389	42.423	8.96601	0.66668	N/A
2614.43	79638.9	79120.3	0.09743	124.495	42.4929	82.0017	6.0979	N/A
2614.44	79639.8	79121.2	0.09745	89.084	42.5712	46.5128	3.45959	10.2242
2614.45	79640.6	79122	0.09746	35.07	42.5712	0	0	N/A
2614.46	79641.4	79122.8	0.09748	29.0126	42.5712	0	0	N/A
2614.47	79642.3	79123.7	0.09749	22.2097	42.5712	0	0	N/A
2614.48	79643.1	79124.5	0.09751	42.3615	42.5712	0	0	N/A
2614.49	79643.9	79125.3	0.09752	55.0826	42.5712	0	0	N/A
2614.5	79644.8	79126.2	0.09754	60.8603	42.5712	0	0	N/A
2614.51	79645.6	79127	0.09755	63.9964	42.5712	0	0	N/A
2614.52	79646.4	79127.8	0.09757	35.2341	42.9694	0	0	N/A
2614.53	79647.3	79128.6	0.09758	23.3025	43.0447	0	0	N/A
2614.54	79648.1	79129.5	0.0976	31.4525	43.0447	0	0	N/A
2614.55	79648.9	79130.3	0.09761	39.4697	43.0447	0	0	N/A
2614.56	79649.8	79131.1	0.09763	45.1679	43.0447	0	0	N/A
2614.57	79650.6	79132	0.09764	36.1035	43.0447	0	0	N/A
2614.58	79651.4	79132.8	0.09766	50.0676	43.0447	0	0	N/A
2614.59	79652.3	79133.6	0.09767	50.9706	43.1796	0	0	N/A
2614.6	79653.1	79134.5	0.09769	37.3038	43.1796	0	0	N/A
2614.61	79653.9	79135.3	0.0977	32.9794	43.0447	0	0	N/A
2614.62	79654.8	79136.1	0.09772	30.2339	43.0447	0	0	N/A
2614.63	79655.6	79137	0.09773	25.1694	42.9694	0	0	N/A
2614.64	79656.4	79137.8	0.09775	26.3808	42.9694	0	0	N/A
2614.65	79657.3	79138.6	0.09776	39.163	42.9694	0	0	N/A
2614.66	79658.1	79139.5	0.09778	48.7565	42.9694	0	0	N/A
2614.67	79658.9	79140.3	0.09779	59.5567	42.5712	0	0	N/A
2614.68	79659.8	79141.1	0.09781	60.164	42.5712	0	0	N/A
2614.69	79660.6	79142	0.09782	44.1452	42.5712	0	0	N/A
2614.7	79661.4	79142.8	0.09784	35.2679	42.5712	0	0	N/A
2614.71	79662.3	79143.6	0.09785	34.9057	42.5712	0	0	N/A
2614.72	79663.1	79144.5	0.09787	43.8403	42.5712	0	0	N/A
2614.73	79663.9	79145.3	0.09788	N/A	42.5712	N/A	N/A	N/A
2614.74	79664.7	79146.1	0.0979	N/A	42.5712	N/A	N/A	N/A
2614.75	79665.6	79147	0.09791	N/A	42.5712	N/A	N/A	N/A
2614.76	79666.4	79147.8	0.09793	51.2331	42.5712	0	0	N/A
2614.77	79667.2	79148.6	0.09795	56.1629	42.5712	0	0	N/A
2614.78	79668.1	79149.5	0.09796	43.901	42.5712	0	0	N/A
2614.79	79668.9	79150.3	0.09798	50.6602	42.5712	0	0	N/A
2614.8	79669.7	79151.1	0.09799	63.9091	42.5712	0	0	N/A
2614.81	79670.6	79152	0.09801	59.7407	42.5712	0	0	N/A
2614.82	79671.4	79152.8	0.09802	58.9746	42.4929	0	0	N/A
2614.83	79672.2	79153.6	0.09804	60.6307	42.4929	0	0	N/A
2614.84	79673.1	79154.5	0.09805	57.9266	42.3615	0	0	N/A
2614.85	79673.9	79155.3	0.09807	N/A	42.3615	N/A	N/A	N/A
2614.86	79674.7	79156.1	0.09808	N/A	42.2965	N/A	N/A	N/A
2614.87	79675.6	79156.9	0.0981	N/A	42.2965	N/A	N/A	N/A
2614.88	79676.4	79157.8	0.09811	N/A	42.2965	N/A	N/A	N/A
2614.89	79677.2	79158.6	0.09813	N/A	42.2965	N/A	N/A	N/A
2614.9	79678.1	79159.4	0.09814	N/A	42.2965	N/A	N/A	N/A
2614.91	79678.9	79160.3	0.09816	N/A	42.2965	N/A	N/A	N/A
2614.92	79679.7	79161.1	0.09817	N/A	42.1304	N/A	N/A	N/A
2614.93	79680.6	79161.9	0.09819	N/A	41.7333	N/A	N/A	N/A
2614.94	79681.4	79162.8	0.0982	40.5199	41.7333	0	0	N/A
2614.95	79682.2	79163.6	0.09822	44.0287	41.7333	0	0	N/A
2614.96	79683.1	79164.4	0.09823	40.0344	41.7333	0	0	N/A
2614.97	79683.9	79165.3	0.09825	37.8746	41.5921	0	0	N/A
2614.98	79684.7	79166.1	0.09826	40.4336	41.5921	0	0	N/A
2614.99	79685.6	79166.9	0.09828	40.2337	41.5921	0	0	N/A
2615	79686.4	79167.8	0.09829	42.2965	41.5921	0	0	N/A
2615.01	79687.2	79168.6	0.09833	29.9248	41.6627	0	0	N/A
2615.02	79688.1	79169.4	0.09837	32.5941	41.5921	0	0	N/A
2615.03	79688.9	79170.3	0.09841	41.7333	41.4613	0	0	N/A
2615.04	79689.7	79171.1	0.09845	40.2023	41.3306	0	0	N/A
2615.05	79690.6	79171.9	0.09849	34.4543	41.2938	0	0	N/A
2615.06	79691.4	79172.8	0.09853	36.2221	41.2938	0	0	N/A
2615.07	79692.2	79173.6	0.09857	43.1796	41.2938	0	0	N/A
2615.08	79693	79174.4	0.0986	38.2412	41.2938	0	0	N/A
2615.09	79693.9	79175.3	0.09864	33.36	40.863	0	0	N/A
2615.1	79694.7	79176.1	0.09868	38.7439	40.7625	0	0	N/A
2615.11	79695.5	79176.9	0.09872	44.5014	40.6619	0	0	N/A
2615.12	79696.4	79177.8	0.09876	50.845	40.6264	0	0	N/A
2615.13	79697.2	79178.6	0.0988	74.7046	40.6619	0	0	N/A
2615.14	79698	79179.4	0.09884	75.5244	40.6619	0	0	N/A
2615.15	79698.9	79180.3	0.09888	78.737	40.6264	0	0	N/A
2615.16	79699.7	79181.1	0.09892	42.1304	40.6264	0	0	N/A
2615.17	79700.5	79181.9	0.09896	N/A	40.6264	N/A	N/A	N/A
2615.18	79701.4	79182.8	0.09899	N/A	40.6264	N/A	N/A	N/A
2615.19	79702.2	79183.6	0.09903	N/A	40.7625	N/A	N/A	N/A
2615.2	79703	79184.4	0.09907	34.8005	40.7625	0	0	N/A
2615.21	79703.9	79185.2	0.09911	36.8659	41.0784	0	0	N/A
2615.22	79704.7	79186.1	0.09915	33.2021	41.0784	0	0	N/A
2615.23	79705.5	79186.9	0.09919	41.2938	41.0784	0	0	N/A
2615.24	79706.4	79187.7	0.09923	32.3378	40.7625	0	0	N/A
2615.25	79707.2	79188.6	0.09927	N/A	40.7625	N/A	N/A	N/A
2615.26	79708	79189.4	0.09931	74.4815	40.7625	0	0	N/A
2615.27	79708.9	79190.2	0.09934	74.6368	40.6264	0	0	N/A
2615.28	79709.7	79191.1	0.09938	53.0492	40.5909	0	0	N/A
2615.29	79710.5	79191.9	0.09942	36.9907	40.5909	0	0	N/A
2615.3	79711.4	79192.7	0.09946	48.7921	40.5909	0	0	N/A
2615.31	79712.2	79193.6	0.0995	51.1315	40.6264	0	0	N/A
2615.32	79713	79194.4	0.09954	54.3249	40.6264	0	0	N/A
2615.33	79713.9	79195.2	0.09958	54.3533	40.5909	0	0	N/A
2615.34	79714.7	79196.1	0.09962	56.5086	40.5909	0	0	N/A
2615.35	79715.5	79196.9	0.09966	59.46	40.5909	0	0	N/A
2615.36	79716.4	79197.7	0.0997	46.3464	40.6619	0	0	N/A
2615.37	79717.2	79198.6	0.09973	54.2299	40.7966	0	0	N/A
2615.38	79718	79199.4	0.09977	55.7214	40.863	0	0	N/A
2615.39	79718.9	79200.2	0.09981	52.2813	40.7966	0	0	N/A
2615.4	79719.7	79201.1	0.09985	55.4145	40.6619	0	0	N/A
2615.41	79720.5	79201.9	0.09989	59.5171	40.6619	0	0	N/A
2615.42	79721.3	79202.7	0.09993	54.5578	40.5909	0	0	N/A
2615.43	79722.2	79203.6	0.09997	72.5611	40.5909	0	0	N/A
2615.44	79723	79204.4	0.10001	70.6429	40.6619	0	0	N/A
2615.45	79723.8	79205.2	0.10005	57.2008	40.6619	0	0	N/A
2615.46	79724.7	79206.1	0.10008	58.6286	40.6619	0	0	N/A
2615.47	79725.5	79206.9	0.10012	51.5272	40.6619	0	0	N/A
2615.48	79726.3	79207.7	0.10016	46.4527	40.7102	0	0	N/A
2615.49	79727.2	79208.6	0.1002	46.9088	40.7102	0	0	N/A
2615.5	79728	79209.4	0.10024	46.085	40.6619	0	0	N/A
2615.51	79728.8	79210.2	0.10028	36.9874	40.6619	0	0	N/A
2615.52	79729.7	79211.1	0.10032	33.6159	40.6619	0	0	N/A
2615.53	79730.5	79211.9	0.10036	40.863	40.6619	0	0	N/A
2615.54	79731.3	79212.7	0.1004	67.6692	40.7102	0	0	N/A
2615.55	79732.2	79213.5	0.10044	53.4249	40.7102	0	0	N/A
2615.56	79733	79214.4	0.10047	46.8174	40.7102	0	0	N/A
2615.57	79733.8	79215.2	0.10051	39.4711	40.7102	0	0	N/A
2615.58	79734.7	79216	0.10055	40.6619	40.7102	0	0	N/A
2615.59	79735.5	79216.9	0.10059	28.2863	40.6619	0	0	N/A
2615.6	79736.3	79217.7	0.10063	28.1341	40.5909	0	0	N/A
2615.61	79737.2	79218.5	0.10067	32.324	40.6619	0	0	N/A
2615.62	79738	79219.4	0.10071	44.9365	40.7102	0	0	N/A
2615.63	79738.8	79220.2	0.10075	54.2266	40.7102	0	0	N/A
2615.64	79739.7	79221	0.10079	42.4929	40.7102	0	0	N/A
2615.65	79740.5	79221.9	0.10082	43.9875	40.6619	0	0	N/A
2615.66	79741.3	79222.7	0.10086	47.6795	40.5909	0	0	N/A
2615.67	79742.2	79223.5	0.1009	40.0854	40.5909	0	0	N/A
2615.68	79743	79224.4	0.10094	36.5139	40.5199	0	0	N/A
2615.69	79743.8	79225.2	0.10098	33.4888	40.5011	0	0	N/A
2615.7	79744.7	79226	0.10102	28.9933	40.5011	0	0	N/A
2615.71	79745.5	79226.9	0.10106	31.7773	40.5011	0	0	N/A
2615.72	79746.3	79227.7	0.1011	31.7463	40.5011	0	0	N/A
2615.73	79747.2	79228.5	0.10114	28.4094	40.4336	0	0	N/A
2615.74	79748	79229.4	0.10118	28.3806	40.4336	0	0	N/A
2615.75	79748.8	79230.2	0.10121	21.7326	40.3336	0	0	N/A
2615.76	79749.6	79231	0.10125	26.7259	40.2337	0	0	N/A
2615.77	79750.5	79231.9	0.10129	34.8926	40.218	0	0	N/A
2615.78	79751.3	79232.7	0.10133	32.1095	40.2023	0	0	N/A
2615.79	79752.1	79233.5	0.10137	37.9977	40.1881	0	0	N/A
2615.8	79753	79234.4	0.10141	47.9818	40.0854	0	0	N/A
2615.81	79753.8	79235.2	0.10145	35.9258	40.0854	0	0	N/A
2615.82	79754.6	79236	0.10149	24.0268	40.0854	0	0	N/A
2615.83	79755.5	79236.9	0.10153	23.6897	40.0854	0	0	N/A
2615.84	79756.3	79237.7	0.10156	21.1447	40.0599	0	0	N/A
2615.85	79757.1	79238.5	0.1016	18.8435	40.0344	0	0	N/A
2615.86	79758	79239.4	0.10164	37.7878	39.7606	0	0	N/A
2615.87	79758.8	79240.2	0.10168	35.4969	39.4789	0	0	N/A
2615.88	79759.6	79241	0.10172	18.3813	39.4789	0	0	N/A
2615.89	79760.5	79241.8	0.10176	15.9588	39.235	0	0	N/A
2615.9	79761.3	79242.7	0.1018	24.818	38.968	0	0	N/A
2615.91	79762.1	79243.5	0.10184	46.0573	38.968	0	0	N/A
2615.92	79763	79244.3	0.10188	41.3306	39.235	0	0	N/A
2615.93	79763.8	79245.2	0.10192	28.4036	39.235	0	0	N/A
2615.94	79764.6	79246	0.10195	21.4487	38.968	0	0	N/A
2615.95	79765.5	79246.8	0.10199	22.5211	38.9371	0	0	N/A
2615.96	79766.3	79247.7	0.10203	23.1654	38.9371	0	0	N/A
2615.97	79767.1	79248.5	0.10207	23.1333	38.9371	0	0	N/A
2615.98	79768	79249.3	0.10211	27.6373	38.8574	0	0	N/A
2615.99	79768.8	79250.2	0.10215	21.6022	38.8574	0	0	N/A
2616	79769.6	79251	0.10219	24.7587	38.9371	0	0	N/A
2616.01	79770.5	79251.8	0.10221	25.5836	38.968	0	0	N/A
2616.02	79771.3	79252.7	0.10223	31.8602	38.968	0	0	N/A
2616.03	79772.1	79253.5	0.10225	44.2835	38.968	0	0	N/A
2616.04	79773	79254.3	0.10228	90.6186	38.968	51.6506	4.03214	N/A
2616.05	79773.8	79255.2	0.1023	59.3175	38.968	20.3495	1.58889	5.62104
2616.06	79774.6	79256	0.10232	25.2091	38.968	0	0	N/A
2616.07	79775.4	79256.8	0.10234	N/A	38.968	N/A	N/A	N/A
2616.08	79776.3	79257.7	0.10236	38.9988	38.9371	0	0	N/A
2616.09	79777.1	79258.5	0.10239	51.6472	38.9371	0	0	N/A
2616.1	79777.9	79259.3	0.10241	44.5757	38.9371	0	0	N/A
2616.11	79778.8	79260.2	0.10243	44.7309	38.9371	0	0	N/A
2616.12	79779.6	79261	0.10245	33.7177	38.9371	0	0	N/A
2616.13	79780.4	79261.8	0.10247	28.7113	38.9371	0	0	N/A
2616.14	79781.3	79262.7	0.1025	37.1595	38.8574	0	0	N/A
2616.15	79782.1	79263.5	0.10252	28.2828	38.8574	0	0	N/A
2616.16	79782.9	79264.3	0.10254	36.3016	38.8574	0	0	N/A
2616.17	79783.8	79265.2	0.10256	37.3798	38.8574	0	0	N/A
2616.18	79784.6	79266	0.10258	35.2037	38.7776	0	0	N/A
2616.19	79785.4	79266.8	0.1026	41.0649	38.7776	0	0	N/A
2616.2	79786.3	79267.6	0.10263	36.4331	38.8574	0	0	N/A
2616.21	79787.1	79268.5	0.10265	52.2745	38.8574	0	0	N/A
2616.22	79787.9	79269.3	0.10267	47.1596	38.7776	0	0	N/A
2616.23	79788.8	79270.1	0.10269	35.3588	38.4624	0	0	N/A
2616.24	79789.6	79271	0.10271	36.0026	38.4624	0	0	N/A
2616.25	79790.4	79271.8	0.10274	44.4999	38.4624	0	0	N/A
2616.26	79791.3	79272.6	0.10276	40.7966	38.4624	0	0	N/A
2616.27	79792.1	79273.5	0.10278	55.9936	38.4624	0	0	N/A
2616.28	79792.9	79274.3	0.1028	59.0107	38.4624	0	0	N/A
2616.29	79793.8	79275.1	0.10282	38.9371	38.1472	0	0	N/A
2616.3	79794.6	79276	0.10285	37.195	38.1472	0	0	N/A
2616.31	79795.4	79276.8	0.10287	46.8107	38.1472	0	0	N/A
2616.32	79796.3	79277.6	0.10289	31.3249	38.1472	0	0	N/A
2616.33	79797.1	79278.5	0.10291	30.1339	38.1472	0	0	N/A
2616.34	79797.9	79279.3	0.10293	51.596	38.1472	0	0	N/A
2616.35	79798.8	79280.1	0.10296	37.4693	38.1472	0	0	N/A
2616.36	79799.6	79281	0.10298	34.1383	38.0724	0	0	N/A
2616.37	79800.4	79281.8	0.103	40.7102	37.8927	0	0	N/A
2616.38	79801.3	79282.6	0.10302	42.9378	37.8927	0	0	N/A
2616.39	79802.1	79283.5	0.10304	56.0017	37.8927	0	0	N/A
2616.4	79802.9	79284.3	0.10307	N/A	37.8927	N/A	N/A	N/A
2616.41	79803.7	79285.1	0.10309	N/A	37.8927	N/A	N/A	N/A
2616.42	79804.6	79286	0.10311	N/A	38.0724	N/A	N/A	N/A
2616.43	79805.4	79286.8	0.10313	N/A	38.1472	N/A	N/A	N/A
2616.44	79806.2	79287.6	0.10315	48.6884	38.1472	0	0	N/A
2616.45	79807.1	79288.5	0.10317	38.7776	38.1472	0	0	N/A
2616.46	79807.9	79289.3	0.1032	33.2519	38.0724	0	0	N/A
2616.47	79808.7	79290.1	0.10322	51.5314	38.0724	0	0	N/A
2616.48	79809.6	79291	0.10324	51.9331	38.0724	0	0	N/A
2616.49	79810.4	79291.8	0.10326	34.6876	38.0724	0	0	N/A
2616.5	79811.2	79292.6	0.10328	32.9458	38.1472	0	0	N/A
2616.51	79812.1	79293.5	0.10331	44.159	38.1472	0	0	N/A
2616.52	79812.9	79294.3	0.10333	44.1296	38.4624	0	0	N/A
2616.53	79813.7	79295.1	0.10335	44.4034	38.4624	0	0	N/A
2616.54	79814.6	79295.9	0.10337	53.5784	38.1472	0	0	N/A
2616.55	79815.4	79296.8	0.10339	30.1523	38.1472	0	0	N/A
2616.56	79816.2	79297.6	0.10342	16.7663	38.1472	0	0	N/A
2616.57	79817.1	79298.4	0.10344	22.4845	38.0724	0	0	N/A
2616.58	79817.9	79299.3	0.10346	13.0816	37.8927	0	0	N/A
2616.59	79818.7	79300.1	0.10348	20.5399	38.0724	0	0	N/A
2616.6	79819.6	79300.9	0.1035	39.4867	38.1472	0	0	N/A
2616.61	79820.4	79301.8	0.10353	56.8169	38.1472	0	0	N/A
2616.62	79821.2	79302.6	0.10355	45.9586	38.1472	0	0	N/A
2616.63	79822.1	79303.4	0.10357	40.1881	38.4624	0	0	N/A
2616.64	79822.9	79304.3	0.10359	58.8794	38.4624	0	0	N/A
2616.65	79823.7	79305.1	0.10361	44.1643	38.4624	5.70188	0.450905	N/A
2616.66	79824.6	79305.9	0.10364	72.6514	38.4624	34.1891	2.70449	N/A
2616.67	79825.4	79306.8	0.10366	99.9683	38.4624	61.5059	4.86629	N/A
2616.68	79826.2	79307.6	0.10368	62.3712	38.4624	23.9088	1.89198	9.91366
2616.69	79827.1	79308.4	0.1037	28.268	38.4624	0	0	N/A
2616.7	79827.9	79309.3	0.10372	36.8028	38.7776	0	0	N/A
2616.71	79828.7	79310.1	0.10375	56.4165	38.7776	0	0	N/A
2616.72	79829.6	79310.9	0.10377	45.6616	38.7776	6.884	0.545234	N/A
2616.73	79830.4	79311.8	0.10379	54.7756	38.7776	15.998	1.26734	N/A
2616.74	79831.2	79312.6	0.10381	71.2129	38.8214	32.3915	2.56646	N/A
2616.75	79832	79313.4	0.10383	85.0019	38.8214	46.1805	3.65975	N/A
2616.76	79832.9	79314.3	0.10385	66.2308	38.8214	27.4095	2.17256	10.2113
2616.77	79833.7	79315.1	0.10388	34.6364	38.8214	0	0	N/A
2616.78	79834.5	79315.9	0.1039	19.046	38.8214	0	0	N/A
2616.79	79835.4	79316.8	0.10392	20.6125	38.8214	0	0	N/A
2616.8	79836.2	79317.6	0.10394	20.3971	38.9011	0	0	N/A
2616.81	79837	79318.4	0.10396	44.4799	38.9371	0	0	N/A
2616.82	79837.9	79319.3	0.10399	57.619	38.9371	0	0	N/A
2616.83	79838.7	79320.1	0.10401	28.6455	38.9011	0	0	N/A
2616.84	79839.5	79320.9	0.10403	16.48	38.9011	0	0	N/A
2616.85	79840.4	79321.8	0.10405	22.4037	38.9011	0	0	N/A
2616.86	79841.2	79322.6	0.10407	22.5938	38.9011	0	0	N/A
2616.87	79842	79323.4	0.1041	28.478	38.9371	0	0	N/A
2616.88	79842.9	79324.2	0.10412	29.3696	38.9371	0	0	N/A
2616.89	79843.7	79325.1	0.10414	31.8665	38.968	0	0	N/A
2616.9	79844.5	79325.9	0.10416	N/A	38.968	N/A	N/A	N/A
2616.91	79845.4	79326.7	0.10418	N/A	38.968	N/A	N/A	N/A
2616.92	79846.2	79327.6	0.10421	N/A	38.968	N/A	N/A	N/A
2616.93	79847	79328.4	0.10423	51.5565	38.968	0	0	N/A
2616.94	79847.9	79329.2	0.10425	52.7963	38.968	0	0	N/A
2616.95	79848.7	79330.1	0.10427	57.1004	38.9988	0	0	N/A
2616.96	79849.5	79330.9	0.10429	62.6692	39.0361	0	0	N/A
2616.97	79850.4	79331.7	0.10432	54.9475	39.0803	0	0	N/A
2616.98	79851.2	79332.6	0.10434	38.1472	39.0361	0	0	N/A
2616.99	79852	79333.4	0.10436	46.2276	39.0803	0	0	N/A
2617	79852.9	79334.2	0.10438	45.2054	39.0803	0	0	N/A
2617.01	79853.7	79335.1	0.10438	34.2547	39.0803	0	0	N/A
2617.02	79854.5	79335.9	0.10437	34.2955	39.0053	0	0	N/A
2617.03	79855.4	79336.7	0.10436	32.4037	39.0803	0	0	N/A
2617.04	79856.2	79337.6	0.10436	30.2623	39.0973	0	0	N/A
2617.05	79857	79338.4	0.10435	22.5964	39.1987	0	0	N/A
2617.06	79857.9	79339.2	0.10435	42.1772	39.1987	0	0	N/A
2617.07	79858.7	79340.1	0.10434	51.3807	39.1987	0	0	N/A
2617.08	79859.5	79340.9	0.10433	35.3738	39.366	0	0	N/A
2617.09	79860.3	79341.7	0.10433	47.6021	39.366	0	0	N/A
2617.1	79861.2	79342.6	0.10432	46.654	39.1987	0	0	N/A
2617.11	79862	79343.4	0.10432	48.5385	39.1987	0	0	N/A
2617.12	79862.8	79344.2	0.10431	32.0377	39.1987	0	0	N/A
2617.13	79863.7	79345.1	0.1043	29.5564	39.1987	0	0	N/A
2617.14	79864.5	79345.9	0.1043	42.8634	39.366	0	0	N/A
2617.15	79865.3	79346.7	0.10429	39.1075	39.366	0	0	N/A
2617.16	79866.2	79347.6	0.10429	39.0734	39.1987	0	0	N/A
2617.17	79867	79348.4	0.10428	50.5489	39.1075	0	0	N/A
2617.18	79867.8	79349.2	0.10427	43.2462	39.0973	0	0	N/A
2617.19	79868.7	79350.1	0.10427	24.4248	39.0871	0	0	N/A
2617.2	79869.5	79350.9	0.10426	32.6833	39.0973	0	0	N/A
2617.21	79870.3	79351.7	0.10426	49.063	39.1075	0	0	N/A
2617.22	79871.2	79352.5	0.10425	58.6971	39.1075	0	0	N/A
2617.23	79872	79353.4	0.10424	57.738	39.1075	0	0	N/A
2617.24	79872.8	79354.2	0.10424	57.4687	39.1075	0	0	N/A
2617.25	79873.7	79355	0.10423	48.7062	39.0871	0	0	N/A
2617.26	79874.5	79355.9	0.10423	34.9557	39.0871	0	0	N/A
2617.27	79875.3	79356.7	0.10422	36.4898	39.0871	0	0	N/A
2617.28	79876.2	79357.5	0.10421	47.3289	39.0871	0	0	N/A
2617.29	79877	79358.4	0.10421	48.1045	39.0734	0	0	N/A
2617.3	79877.8	79359.2	0.1042	52.0356	38.9371	0	0	N/A
2617.31	79878.7	79360	0.1042	45.1318	38.9371	0	0	N/A
2617.32	79879.5	79360.9	0.10419	39.7661	38.9371	0	0	N/A
2617.33	79880.3	79361.7	0.10418	43.264	38.9371	0	0	N/A
2617.34	79881.2	79362.5	0.10418	54.247	38.8651	0	0	N/A
2617.35	79882	79363.4	0.10417	45.5972	38.7776	0	0	N/A
2617.36	79882.8	79364.2	0.10417	36.2512	38.6974	0	0	N/A
2617.37	79883.7	79365	0.10416	52.0143	38.8651	0	0	N/A
2617.38	79884.5	79365.9	0.10415	72.7233	38.8651	0	0	N/A
2617.39	79885.3	79366.7	0.10415	56.0306	38.8651	0	0	N/A
2617.4	79886.2	79367.5	0.10414	50.8105	39.0734	0	0	N/A
2617.41	79887	79368.4	0.10414	55.3024	39.0734	0	0	N/A
2617.42	79887.8	79369.2	0.10413	39.6225	38.8651	0	0	N/A
2617.43	79888.6	79370	0.10412	43.3747	38.6974	0	0	N/A
2617.44	79889.5	79370.9	0.10412	34.1044	38.6974	0	0	N/A
2617.45	79890.3	79371.7	0.10411	40.8978	38.6974	0	0	N/A
2617.46	79891.1	79372.5	0.10411	32.0588	38.6974	0	0	N/A
2617.47	79892	79373.4	0.1041	31.2869	38.8651	0	0	N/A
2617.48	79892.8	79374.2	0.10409	32.697	39.0734	0	0	N/A
2617.49	79893.6	79375	0.10409	38.8651	39.0871	0	0	N/A
2617.5	79894.5	79375.9	0.10408	47.2014	39.0871	0	0	N/A
2617.51	79895.3	79376.7	0.10408	39.4421	39.0734	0	0	N/A
2617.52	79896.1	79377.5	0.10407	35.7621	38.8651	0	0	N/A
2617.53	79897	79378.4	0.10406	40.6129	38.8651	0	0	N/A
2617.54	79897.8	79379.2	0.10406	34.1359	38.8651	0	0	N/A
2617.55	79898.6	79380	0.10405	32.4332	38.6974	0	0	N/A
2617.56	79899.5	79380.8	0.10405	30.2895	38.6974	0	0	N/A
2617.57	79900.3	79381.7	0.10404	25.3579	38.6974	0	0	N/A
2617.58	79901.1	79382.5	0.10403	28.5478	38.6909	0	0	N/A
2617.59	79902	79383.3	0.10403	25.9486	38.6845	0	0	N/A
2617.6	79902.8	79384.2	0.10402	41.5541	38.6845	0	0	N/A
2617.61	79903.6	79385	0.10402	41.3448	38.6974	0	0	N/A
2617.62	79904.5	79385.8	0.10401	28.4929	38.6974	0	0	N/A
2617.63	79905.3	79386.7	0.104	35.0604	38.6974	0	0	N/A
2617.64	79906.1	79387.5	0.104	41.3284	38.6974	0	0	N/A
2617.65	79907	79388.3	0.10399	32.9921	38.6974	0	0	N/A
2617.66	79907.8	79389.2	0.10399	10.8242	38.6974	0	0	N/A
2617.67	79908.6	79390	0.10398	17.2422	38.7812	0	0	N/A
2617.68	79909.5	79390.8	0.10397	32.3951	38.9693	0	0	N/A
2617.69	79910.3	79391.7	0.10397	34.9438	39.0803	0	0	N/A
2617.7	79911.1	79392.5	0.10396	57.1917	39.0973	0	0	N/A
2617.71	79912	79393.3	0.10396	77.2842	39.1987	0	0	N/A
2617.72	79912.8	79394.2	0.10395	49.2773	39.1987	0	0	N/A
2617.73	79913.6	79395	0.10394	38.6845	39.1987	0	0	N/A
2617.74	79914.4	79395.8	0.10394	37.9278	39.1987	0	0	N/A
2617.75	79915.3	79396.7	0.10393	34.6192	39.1987	0	0	N/A
2617.76	79916.1	79397.5	0.10393	38.6138	39.1987	0	0	N/A
2617.77	79916.9	79398.3	0.10392	67.2216	39.29	27.9316	2.21547	N/A
2617.78	79917.8	79399.2	0.10391	83.697	39.366	44.331	3.51584	5.73131
2617.79	79918.6	79400	0.10391	43.6265	39.4421	0	0	N/A
2617.8	79919.4	79400.8	0.1039	21.7384	39.5323	0	0	N/A
2617.81	79920.3	79401.7	0.1039	30.2745	39.4421	0	0	N/A
2617.82	79921.1	79402.5	0.10389	24.4906	39.366	0	0	N/A
2617.83	79921.9	79403.3	0.10388	26.0992	39.29	0	0	N/A
2617.84	79922.8	79404.2	0.10388	39.0871	39.1987	0	0	N/A
2617.85	79923.6	79405	0.10387	N/A	39.0973	N/A	N/A	N/A
2617.86	79924.4	79405.8	0.10387	N/A	39.0803	N/A	N/A	N/A
2617.87	79925.3	79406.6	0.10386	43.1908	38.9693	0	0	N/A
2617.88	79926.1	79407.5	0.10385	31.2459	38.7812	0	0	N/A
2617.89	79926.9	79408.3	0.10385	45.4406	38.7812	0	0	N/A
2617.9	79927.8	79409.1	0.10384	77.0192	38.7812	0	0	N/A
2617.91	79928.6	79410	0.10384	56.1125	38.6974	0	0	N/A
2617.92	79929.4	79410.8	0.10383	36.5293	38.7812	0	0	N/A
2617.93	79930.3	79411.6	0.10382	39.8003	38.8651	0	0	N/A
2617.94	79931.1	79412.5	0.10382	63.1342	39.0734	0	0	N/A
2617.95	79931.9	79413.3	0.10381	40.4312	39.0871	0	0	N/A
2617.96	79932.8	79414.1	0.10381	18.456	39.0871	0	0	N/A
2617.97	79933.6	79415	0.1038	30.8466	39.0734	0	0	N/A
2617.98	79934.4	79415.8	0.10379	45.056	38.8651	0	0	N/A
2617.99	79935.3	79416.6	0.10379	33.7894	38.8651	0	0	N/A
2618	79936.1	79417.5	0.10378	23.0574	38.6974	0	0	N/A
2618.01	79936.9	79418.3	0.10381	24.8625	38.6974	0	0	N/A
2618.02	79937.8	79419.1	0.10384	64.5828	38.6974	0	0	N/A
2618.03	79938.6	79420	0.10387	76.9302	38.6974	0	0	N/A
2618.04	79939.4	79420.8	0.1039	48.7375	38.6974	0	0	N/A
2618.05	79940.3	79421.6	0.10393	18.2077	38.6974	0	0	N/A
2618.06	79941.1	79422.5	0.10396	30.4283	38.6845	0	0	N/A
2618.07	79941.9	79423.3	0.10399	94.3665	38.669	55.6975	4.42077	N/A
2618.08	79942.7	79424.1	0.10401	129.629	38.6296	90.9993	6.91606	N/A
2618.09	79943.5	79424.9	0.10404	101.27	38.6138	62.6561	4.73977	N/A
2618.1	79944.3	79425.7	0.10407	93.3911	38.6296	54.7615	4.14376	N/A
2618.11	79945.1	79426.5	0.1041	55.846	38.669	17.177	1.30015	21.5205
2618.12	79945.9	79427.3	0.10413	41.588	38.669	0	0	N/A
2618.13	79946.7	79428.1	0.10416	38.669	38.669	0	0	N/A
2618.14	79947.5	79428.9	0.10419	31.7359	38.669	0	0	N/A
2618.15	79948.3	79429.6	0.10422	22.4566	38.669	0	0	N/A
2618.16	79949.1	79430.4	0.10425	23.9087	38.6296	0	0	N/A
2618.17	79949.8	79431.2	0.10427	35.0114	38.669	0	0	N/A
2618.18	79950.6	79432	0.1043	52.8599	38.6767	0	0	N/A
2618.19	79951.4	79432.8	0.10433	N/A	38.669	N/A	N/A	N/A
2618.2	79952.2	79433.6	0.10436	N/A	38.6493	N/A	N/A	N/A
2618.21	79953	79434.4	0.10439	34.2721	38.6296	0	0	N/A
2618.22	79953.8	79435.2	0.10442	38.6296	38.6217	0	0	N/A
2618.23	79954.6	79436	0.10445	31.1513	38.6138	0	0	N/A
2618.24	79955.4	79436.8	0.10448	25.0365	38.2748	0	0	N/A
2618.25	79956.2	79437.6	0.10451	25.2046	37.9358	0	0	N/A
2618.26	79957	79438.4	0.10453	34.4225	37.9318	0	0	N/A
2618.27	79957.8	79439.2	0.10456	39.8204	37.9358	0	0	N/A
2618.28	79958.6	79440	0.10459	55.5593	37.9318	0	0	N/A
2618.29	79959.4	79440.7	0.10462	56.0454	37.9278	0	0	N/A
2618.3	79960.2	79441.5	0.10465	42.8731	37.881	0	0	N/A
2618.31	79961	79442.3	0.10468	19.218	37.8342	0	0	N/A
2618.32	79961.7	79443.1	0.10471	18.8618	37.7085	0	0	N/A
2618.33	79962.5	79443.9	0.10474	16.7642	37.5827	0	0	N/A
2618.34	79963.3	79444.7	0.10477	21.581	37.056	0	0	N/A
2618.35	79964.1	79445.5	0.1048	42.9577	37.5827	0	0	N/A
2618.36	79964.9	79446.3	0.10482	49.4538	37.056	0	0	N/A
2618.37	79965.7	79447.1	0.10485	46.3849	37.5827	0	0	N/A
2618.38	79966.5	79447.9	0.10488	52.2002	37.7085	0	0	N/A
2618.39	79967.3	79448.7	0.10491	43.2502	37.8342	0	0	N/A
2618.4	79968.1	79449.5	0.10494	30.653	37.7085	0	0	N/A
2618.41	79968.9	79450.3	0.10497	23.0148	37.5827	0	0	N/A
2618.42	79969.7	79451.1	0.105	31.8961	37.056	0	0	N/A
2618.43	79970.5	79451.8	0.10503	57.5874	37.5827	0	0	N/A
2618.44	79971.3	79452.6	0.10506	49.1825	37.056	0	0	N/A
2618.45	79972.1	79453.4	0.10508	21.5404	37.5827	0	0	N/A
2618.46	79972.8	79454.2	0.10511	22.2357	37.7085	0	0	N/A
2618.47	79973.6	79455	0.10514	21.4289	37.8342	0	0	N/A
2618.48	79974.4	79455.8	0.10517	19.3446	37.881	0	0	N/A
2618.49	79975.2	79456.6	0.1052	32.656	37.9318	0	0	N/A
2618.5	79976	79457.4	0.10523	25.9268	38.2748	0	0	N/A
2618.51	79976.8	79458.2	0.10526	39.29	38.0498	0	0	N/A
2618.52	79977.6	79459	0.10529	39.6422	38.0498	0	0	N/A
2618.53	79978.4	79459.8	0.10532	42.0655	38.3888	0	0	N/A
2618.54	79979.2	79460.6	0.10534	29.8147	38.6217	0	0	N/A
2618.55	79980	79461.4	0.10537	N/A	38.6217	N/A	N/A	N/A
2618.56	79980.8	79462.2	0.1054	N/A	38.6493	N/A	N/A	N/A
2618.57	79981.6	79462.9	0.10543	49.5108	38.6767	0	0	N/A
2618.58	79982.4	79463.7	0.10546	46.8478	38.6909	0	0	N/A
2618.59	79983.2	79464.5	0.10549	41.0344	38.6974	0	0	N/A
2618.6	79983.9	79465.3	0.10552	41.2329	38.6974	0	0	N/A
2618.61	79984.7	79466.1	0.10555	54.1061	38.6974	0	0	N/A
2618.62	79985.5	79466.9	0.10558	60.9555	38.6974	0	0	N/A
2618.63	79986.3	79467.7	0.1056	44.6637	38.6909	0	0	N/A
2618.64	79987.1	79468.5	0.10563	33.5566	38.6974	0	0	N/A
2618.65	79987.9	79469.3	0.10566	29.1837	38.6974	0	0	N/A
2618.66	79988.7	79470.1	0.10569	30.2976	38.6974	0	0	N/A
2618.67	79989.5	79470.9	0.10572	63.0717	38.6974	0	0	N/A
2618.68	79990.3	79471.7	0.10575	54.9232	38.6974	0	0	N/A
2618.69	79991.1	79472.5	0.10578	60.7996	38.6974	0	0	N/A
2618.7	79991.9	79473.3	0.10581	55.112	38.6974	0	0	N/A
2618.71	79992.7	79474	0.10584	32.1799	38.6974	0	0	N/A
2618.72	79993.5	79474.8	0.10587	31.214	38.6974	0	0	N/A
2618.73	79994.3	79475.6	0.10589	33.8492	38.863	0	0	N/A
2618.74	79995	79476.4	0.10592	35.0814	39.0871	0	0	N/A
2618.75	79995.8	79477.2	0.10595	27.4297	39.29	0	0	N/A
2618.76	79996.6	79478	0.10598	36.0906	38.863	0	0	N/A
2618.77	79997.4	79478.8	0.10601	32.0328	38.6974	0	0	N/A
2618.78	79998.2	79479.6	0.10604	33.9984	38.6974	0	0	N/A
2618.79	79999	79480.4	0.10607	34.1969	38.6974	0	0	N/A
2618.8	79999.8	79481.2	0.1061	45.3903	38.6974	0	0	N/A
2618.81	80000.6	79482	0.10613	77.2472	38.6974	38.5498	2.97477	N/A
2618.82	80001.4	79482.8	0.10615	94.8843	38.6974	56.1869	4.33659	N/A
2618.83	80002.2	79483.6	0.10618	67.5153	38.6974	28.8179	2.22484	9.53619
2618.84	80003	79484.4	0.10621	47.5044	38.6974	0	0	N/A
2618.85	80003.8	79485.1	0.10624	41.6322	38.6974	0	0	N/A
2618.86	80004.6	79485.9	0.10627	23.6361	38.6974	0	0	N/A
2618.87	80005.4	79486.7	0.1063	21.395	38.6974	0	0	N/A
2618.88	80006.1	79487.5	0.10633	27.2968	38.6974	0	0	N/A
2618.89	80006.9	79488.3	0.10636	33.9758	38.6974	0	0	N/A
2618.9	80007.7	79489.1	0.10639	28.3074	38.6974	0	0	N/A
2618.91	80008.5	79489.9	0.10641	N/A	38.6974	N/A	N/A	N/A
2618.92	80009.3	79490.7	0.10644	38.6974	38.6974	0	0	N/A
2618.93	80010.1	79491.5	0.10647	37.8342	38.6974	0	0	N/A
2618.94	80010.9	79492.3	0.1065	24.2355	38.6974	0	0	N/A
2618.95	80011.7	79493.1	0.10653	30.7509	38.6974	0	0	N/A
2618.96	80012.5	79493.9	0.10656	19.9711	38.6974	0	0	N/A
2618.97	80013.3	79494.7	0.10659	29.1884	38.6974	0	0	N/A
2618.98	80014.1	79495.5	0.10662	37.9358	38.7802	0	0	N/A
2618.99	80014.9	79496.2	0.10665	37.5827	38.863	0	0	N/A
2619	80015.7	79497	0.10668	39.7225	39.0765	0	0	N/A
2619.01	80016.5	79497.8	0.10669	46.7497	39.29	0	0	N/A
2619.02	80017.2	79498.6	0.1067	45.0601	39.4373	0	0	N/A
2619.03	80018	79499.4	0.10671	39.5846	39.4373	0	0	N/A
2619.04	80018.8	79500.2	0.10672	40.0856	39.6134	0	0	N/A
2619.05	80019.6	79501	0.10673	46.4376	39.6823	0	0	N/A
2619.06	80020.4	79501.8	0.10675	32.0055	39.7314	0	0	N/A
2619.07	80021.2	79502.6	0.10676	N/A	39.7804	N/A	N/A	N/A
2619.08	80022	79503.4	0.10677	64.3963	39.8822	24.5141	1.90309	N/A
2619.09	80022.8	79504.2	0.10678	99.4544	39.8822	59.5722	4.62516	N/A
2619.1	80023.6	79505	0.10679	136.038	40.0148	96.0229	7.45597	N/A
2619.11	80024.4	79505.8	0.10681	181.397	40.1984	141.199	10.9657	N/A
2619.12	80025.2	79506.6	0.10682	183.011	40.1984	142.813	11.0921	N/A
2619.13	80026	79507.3	0.10683	204.191	40.6728	163.518	12.7014	N/A
2619.14	80026.8	79508.1	0.10684	255.883	41.1336	214.749	16.6824	N/A
2619.15	80027.5	79508.9	0.10685	351.493	41.1336	310.359	23.6297	N/A
2619.16	80028.3	79509.7	0.10687	432.22	41.3643	390.855	29.5042	N/A
2619.17	80029.1	79510.5	0.10688	437.231	41.5529	395.678	29.8707	N/A
2619.18	80029.8	79511.2	0.10689	453.242	41.6212	411.621	31.0771	N/A
2619.19	80030.6	79512	0.1069	521.145	41.6212	479.524	36.2072	N/A
2619.2	80031.4	79512.8	0.10691	417.935	41.6212	376.314	28.4168	N/A
2619.21	80032.2	79513.5	0.10693	341.055	41.5529	299.502	22.621	N/A
2619.22	80032.9	79514.3	0.10694	322.787	41.5529	281.234	21.243	N/A
2619.23	80033.7	79515.1	0.10695	341.523	41.6212	299.902	22.6552	N/A
2619.24	80034.5	79515.9	0.10696	280.521	41.6499	238.871	18.0465	N/A
2619.25	80035.2	79516.6	0.10697	189.055	41.6857	147.369	11.1348	N/A
2619.26	80036	79517.4	0.10699	99.3402	41.6857	57.6545	4.35695	N/A
2619.27	80036.8	79518.2	0.107	74.3994	41.6857	32.7137	2.4724	N/A
2619.28	80037.6	79518.9	0.10701	83.5399	41.6857	41.8542	3.16352	N/A
2619.29	80038.3	79519.7	0.10702	67.7564	41.6857	26.0707	1.97071	N/A
2619.3	80039.1	79520.5	0.10703	65.408	41.6499	23.7581	1.79609	N/A
2619.31	80039.9	79521.2	0.10705	69.4342	41.6499	27.7842	2.10084	N/A
2619.32	80040.6	79522	0.10706	77.1745	41.6499	35.5246	2.68635	N/A
2619.33	80041.4	79522.8	0.10707	71.0223	41.6499	29.3724	2.22133	N/A
2619.34	80042.2	79523.6	0.10708	61.2098	41.6499	19.5599	1.4794	N/A
2619.35	80042.9	79524.3	0.10709	59.3509	41.6499	17.701	1.33892	N/A
2619.36	80043.7	79525.1	0.1071	70.6119	41.6499	28.9619	2.19091	N/A
2619.37	80044.5	79525.9	0.10712	60.0299	41.6499	18.38	1.39066	N/A
2619.38	80045.3	79526.6	0.10713	56.6411	41.6499	14.9912	1.13437	368.134
2619.39	80046	79527.4	0.10714	46.0212	41.6857	0	0	N/A
2619.4	80046.8	79528.2	0.10715	N/A	41.7764	N/A	N/A	N/A
2619.41	80047.6	79528.9	0.10716	38.1639	41.8806	0	0	N/A
2619.42	80048.3	79529.7	0.10718	44.2336	41.9889	0	0	N/A
2619.43	80049.1	79530.5	0.10719	43.1291	41.9889	0	0	N/A
2619.44	80049.9	79531.3	0.1072	54.7852	41.8806	0	0	N/A
2619.45	80050.6	79532	0.10721	57.8424	42.184	0	0	N/A
2619.46	80051.4	79532.8	0.10722	70.8948	42.7924	0	0	N/A
2619.47	80052.2	79533.6	0.10724	74.9088	43.1415	0	0	N/A
2619.48	80053	79534.3	0.10725	58.8688	42.7924	0	0	N/A
2619.49	80053.7	79535.1	0.10726	59.1296	42.184	0	0	N/A
2619.5	80054.5	79535.9	0.10727	64.8513	42.184	22.6672	1.71745	N/A
2619.51	80055.3	79536.6	0.10728	68.4471	42.184	26.2631	1.99008	N/A
2619.52	80056	79537.4	0.1073	76.8655	41.808	35.0574	2.657	N/A
2619.53	80056.8	79538.2	0.10731	95.4189	41.6857	53.7332	4.07277	N/A
2619.54	80057.6	79539	0.10732	63.7447	41.6499	22.0948	1.67486	12.1122
2619.55	80058.3	79539.7	0.10733	40.3113	41.6499	0	0	N/A
2619.56	80059.1	79540.5	0.10734	38.863	41.6499	0	0	N/A
2619.57	80059.9	79541.3	0.10736	31.3103	41.6499	0	0	N/A
2619.58	80060.7	79542	0.10737	35.782	41.5639	0	0	N/A
2619.59	80061.4	79542.8	0.10738	33.2221	41.0559	0	0	N/A
2619.6	80062.2	79543.6	0.10739	30.6916	40.4638	0	0	N/A
2619.61	80063	79544.4	0.1074	63.0476	40.1984	0	0	N/A
2619.62	80063.7	79545.1	0.10742	76.7211	40.1984	0	0	N/A
2619.63	80064.5	79545.9	0.10743	58.1971	40.1984	0	0	N/A
2619.64	80065.3	79546.7	0.10744	62.7044	40.1984	0	0	N/A
2619.65	80066.1	79547.4	0.10745	46.0007	40.4638	0	0	N/A
2619.66	80066.8	79548.2	0.10746	27.1042	41.0559	0	0	N/A
2619.67	80067.6	79549	0.10747	29.6832	41.0559	0	0	N/A
2619.68	80068.4	79549.7	0.10749	23.2132	41.0559	0	0	N/A
2619.69	80069.1	79550.5	0.1075	29.2187	41.0559	0	0	N/A
2619.7	80069.9	79551.3	0.10751	41.4956	41.0559	0	0	N/A
2619.71	80070.7	79552.1	0.10752	44.6162	40.4638	0	0	N/A
2619.72	80071.4	79552.8	0.10753	36.0934	40.3113	0	0	N/A
2619.73	80072.2	79553.6	0.10755	38.487	40.1984	0	0	N/A
2619.74	80073	79554.4	0.10756	51.4644	40.3113	0	0	N/A
2619.75	80073.8	79555.1	0.10757	79.2443	40.0856	0	0	N/A
2619.76	80074.5	79555.9	0.10758	48.7007	39.9941	0	0	N/A
2619.77	80075.3	79556.7	0.10759	41.7038	39.9941	0	0	N/A
2619.78	80076.1	79557.4	0.10761	46.4687	39.9941	0	0	N/A
2619.79	80076.8	79558.2	0.10762	28.8569	39.9941	0	0	N/A
2619.8	80077.6	79559	0.10763	11.7291	39.9941	0	0	N/A
2619.81	80078.4	79559.8	0.10764	11.9887	39.9941	0	0	N/A
2619.82	80079.1	79560.5	0.10765	19.4763	39.9941	0	0	N/A
2619.83	80079.9	79561.3	0.10767	37.5332	39.9941	0	0	N/A
2619.84	80080.7	79562.1	0.10768	43.6781	39.9941	0	0	N/A
2619.85	80081.5	79562.8	0.10769	46.9535	40.0856	0	0	N/A
2619.86	80082.2	79563.6	0.1077	50.3497	40.0856	0	0	N/A
2619.87	80083	79564.4	0.10771	51.4572	40.3113	0	0	N/A
2619.88	80083.8	79565.1	0.10773	71.4826	40.6162	0	0	N/A
2619.89	80084.5	79565.9	0.10774	74.4604	40.6162	0	0	N/A
2619.9	80085.3	79566.7	0.10775	50.706	40.6162	0	0	N/A
2619.91	80086.1	79567.5	0.10776	39.944	40.6162	0	0	N/A
2619.92	80086.8	79568.2	0.10777	45.8044	40.3113	0	0	N/A
2619.93	80087.6	79569	0.10779	43.2616	40.3113	0	0	N/A
2619.94	80088.4	79569.8	0.1078	39.7404	40.6162	0	0	N/A
2619.95	80089.2	79570.5	0.10781	45.6009	40.6162	0	0	N/A
2619.96	80089.9	79571.3	0.10782	45.3098	40.3113	0	0	N/A
2619.97	80090.7	79572.1	0.10783	41.6676	40.3113	0	0	N/A
2619.98	80091.5	79572.9	0.10785	43.7708	39.9941	0	0	N/A
2619.99	80092.2	79573.6	0.10786	49.1598	39.9941	0	0	N/A
2620	80093	79574.4	0.10787	55.2061	39.9941	0	0	N/A
2620.01	80093.8	79575.2	0.10786	56.3024	39.9941	0	0	N/A
2620.02	80094.6	79575.9	0.10785	26.1006	39.9941	0	0	N/A
2620.03	80095.3	79576.7	0.10784	41.9123	39.9691	0	0	N/A
2620.04	80096.1	79577.5	0.10783	53.7956	39.9941	0	0	N/A
2620.05	80096.9	79578.2	0.10782	39.2003	39.9691	0	0	N/A
2620.06	80097.6	79579	0.10781	45.2986	39.944	0	0	N/A
2620.07	80098.4	79579.8	0.1078	44.3433	39.944	0	0	N/A
2620.08	80099.2	79580.6	0.10779	44.7791	39.944	0	0	N/A
2620.09	80099.9	79581.3	0.10779	52.3924	39.8758	0	0	N/A
2620.1	80100.7	79582.1	0.10778	47.1122	39.8076	0	0	N/A
2620.11	80101.5	79582.9	0.10777	32.9846	39.8076	0	0	N/A
2620.12	80102.3	79583.6	0.10776	40.6162	39.8076	0	0	N/A
2620.13	80103	79584.4	0.10775	42.4558	39.774	0	0	N/A
2620.14	80103.8	79585.2	0.10774	58.209	39.7404	0	0	N/A
2620.15	80104.6	79585.9	0.10773	48.8626	39.7404	0	0	N/A
2620.16	80105.3	79586.7	0.10772	55.0102	39.7404	0	0	N/A
2620.17	80106.1	79587.5	0.10771	60.748	39.6061	0	0	N/A
2620.18	80106.9	79588.3	0.1077	71.0677	39.4718	0	0	N/A
2620.19	80107.6	79589	0.10769	55.3139	39.3361	0	0	N/A
2620.2	80108.4	79589.8	0.10768	N/A	39.2003	N/A	N/A	N/A
2620.21	80109.2	79590.6	0.10767	N/A	39.0316	N/A	N/A	N/A
2620.22	80110	79591.3	0.10766	N/A	38.863	N/A	N/A	N/A
2620.23	80110.7	79592.1	0.10765	N/A	38.675	N/A	N/A	N/A
2620.24	80111.5	79592.9	0.10765	50.1657	38.487	0	0	N/A
2620.25	80112.3	79593.6	0.10764	46.627	38.3255	0	0	N/A
2620.26	80113	79594.4	0.10763	35.5074	38.1639	0	0	N/A
2620.27	80113.8	79595.2	0.10762	13.9393	38.3255	0	0	N/A
2620.28	80114.6	79596	0.10761	39.9941	38.1639	0	0	N/A
2620.29	80115.3	79596.7	0.1076	51.8962	38.0925	0	0	N/A
2620.3	80116.1	79597.5	0.10759	49.2183	37.7771	0	0	N/A
2620.31	80116.9	79598.3	0.10758	52.2615	37.7771	0	0	N/A
2620.32	80117.7	79599	0.10757	46.9681	37.5033	0	0	N/A
2620.33	80118.4	79599.8	0.10756	31.2442	37.5033	0	0	N/A
2620.34	80119.2	79600.6	0.10755	22.3645	37.5033	0	0	N/A
2620.35	80120	79601.4	0.10754	43.154	37.5033	0	0	N/A
2620.36	80120.7	79602.1	0.10753	46.9218	37.5033	0	0	N/A
2620.37	80121.5	79602.9	0.10752	47.1276	37.4189	0	0	N/A
2620.38	80122.3	79603.7	0.10751	32.2168	37.2437	0	0	N/A
2620.39	80123.1	79604.4	0.10751	32.9008	37.2437	0	0	N/A
2620.4	80123.8	79605.2	0.1075	28.5856	37.2437	0	0	N/A
2620.41	80124.6	79606	0.10749	31.018	37.1231	0	0	N/A
2620.42	80125.4	79606.7	0.10748	28.9478	37.0801	0	0	N/A
2620.43	80126.1	79607.5	0.10747	34.7052	37.1231	0	0	N/A
2620.44	80126.9	79608.3	0.10746	35.5044	37.2437	0	0	N/A
2620.45	80127.7	79609.1	0.10745	26.4814	37.3643	0	0	N/A
2620.46	80128.4	79609.8	0.10744	23.962	37.3643	0	0	N/A
2620.47	80129.2	79610.6	0.10743	24.8921	37.2437	0	0	N/A
2620.48	80130	79611.4	0.10742	17.6168	37.3643	0	0	N/A
2620.49	80130.8	79612.1	0.10741	16.1048	37.4189	0	0	N/A
2620.5	80131.5	79612.9	0.1074	11.7047	37.4735	0	0	N/A
2620.51	80132.3	79613.7	0.10739	8.37255	37.5033	0	0	N/A
2620.52	80133.1	79614.4	0.10738	5.97663	37.4735	0	0	N/A
2620.53	80133.8	79615.2	0.10737	14.8304	37.4189	0	0	N/A
2620.54	80134.6	79616	0.10737	21.1214	37.3643	0	0	N/A
2620.55	80135.4	79616.8	0.10736	41.4997	37.1231	0	0	N/A
2620.56	80136.1	79617.5	0.10735	49.5656	37.1231	0	0	N/A
2620.57	80136.9	79618.3	0.10734	31.3534	37.3643	0	0	N/A
2620.58	80137.7	79619.1	0.10733	25.5322	37.3643	0	0	N/A
2620.59	80138.5	79619.8	0.10732	14.873	37.3643	0	0	N/A
2620.6	80139.2	79620.6	0.10731	20.3271	37.4735	0	0	N/A
2620.61	80140	79621.4	0.1073	17.6934	37.3643	0	0	N/A
2620.62	80140.8	79622.1	0.10729	20.2634	37.1231	0	0	N/A
2620.63	80141.5	79622.9	0.10728	36.7855	37.1231	0	0	N/A
2620.64	80142.3	79623.7	0.10727	45.2739	37.1231	0	0	N/A
2620.65	80143.1	79624.5	0.10726	37.0371	37.1231	0	0	N/A
2620.66	80143.8	79625.2	0.10725	39.4718	37.0371	0	0	N/A
2620.67	80144.6	79626	0.10724	37.4735	36.9574	0	0	N/A
2620.68	80145.4	79626.8	0.10723	36.7204	36.9574	0	0	N/A
2620.69	80146.2	79627.5	0.10723	25.5244	36.7855	0	0	N/A
2620.7	80146.9	79628.3	0.10722	29.7813	36.7855	0	0	N/A
2620.71	80147.7	79629.1	0.10721	25.9587	36.9574	0	0	N/A
2620.72	80148.5	79629.9	0.1072	28.0838	36.9574	0	0	N/A
2620.73	80149.2	79630.6	0.10719	38.0211	36.9574	0	0	N/A
2620.74	80150	79631.4	0.10718	46.5776	36.7855	0	0	N/A
2620.75	80150.8	79632.2	0.10717	45.9521	36.7855	0	0	N/A
2620.76	80151.6	79632.9	0.10716	31.892	36.7204	0	0	N/A
2620.77	80152.3	79633.7	0.10715	54.1134	36.679	0	0	N/A
2620.78	80153.1	79634.5	0.10714	45.6474	36.5764	0	0	N/A
2620.79	80153.9	79635.2	0.10713	37.3643	36.5435	0	0	N/A
2620.8	80154.6	79636	0.10712	28.1875	36.5435	0	0	N/A
2620.81	80155.4	79636.8	0.10711	24.6763	36.5435	0	0	N/A
2620.82	80156.2	79637.6	0.1071	16.3924	35.9865	0	0	N/A
2620.83	80156.9	79638.3	0.10709	42.9319	35.8663	0	0	N/A
2620.84	80157.7	79639.1	0.10709	57.6502	35.8663	0	0	N/A
2620.85	80158.5	79639.9	0.10708	36.679	35.5074	0	0	N/A
2620.86	80159.3	79640.6	0.10707	19.9624	35.5074	0	0	N/A
2620.87	80160	79641.4	0.10706	16.193	35.5044	0	0	N/A
2620.88	80160.8	79642.2	0.10705	9.17571	35.5044	0	0	N/A
2620.89	80161.6	79642.9	0.10704	6.63443	35.2587	0	0	N/A
2620.9	80162.3	79643.7	0.10703	23.2908	35.1142	0	0	N/A
2620.91	80163.1	79644.5	0.10702	44.4286	34.9697	0	0	N/A
2620.92	80163.9	79645.3	0.10701	32.1746	34.8563	0	0	N/A
2620.93	80164.6	79646	0.107	39.8076	34.9697	0	0	N/A
2620.94	80165.4	79646.8	0.10699	40.4361	34.9697	0	0	N/A
2620.95	80166.2	79647.6	0.10698	32.2384	34.8563	0	0	N/A
2620.96	80167	79648.3	0.10697	19.137	34.7052	0	0	N/A
2620.97	80167.7	79649.1	0.10696	10.6379	34.7052	0	0	N/A
2620.98	80168.5	79649.9	0.10695	16.6699	34.7052	0	0	N/A
2620.99	80169.3	79650.6	0.10695	N/A	34.7052	N/A	N/A	N/A
2621	80170	79651.4	0.10694	27.7095	34.7052	0	0	N/A
2621.01	80170.8	79652.2	0.10693	26.3333	34.5632	0	0	N/A
2621.02	80171.6	79653	0.10692	27.138	34.5632	0	0	N/A
2621.03	80172.3	79653.7	0.10691	28.6762	34.4	0	0	N/A
2621.04	80173.1	79654.5	0.1069	28.1655	34.1509	0	0	N/A
2621.05	80173.9	79655.3	0.10689	30.861	34.1509	0	0	N/A
2621.06	80174.7	79656	0.10688	35.2587	34.1509	0	0	N/A
2621.07	80175.4	79656.8	0.10687	34.5632	34.1509	0	0	N/A
2621.08	80176.2	79657.6	0.10686	30.5298	34.1509	0	0	N/A
2621.09	80177	79658.3	0.10685	28.0083	34.1509	0	0	N/A
2621.1	80177.7	79659.1	0.10684	37.1231	34.1509	0	0	N/A
2621.11	80178.5	79659.9	0.10683	26.357	34.1509	0	0	N/A
2621.12	80179.3	79660.7	0.10683	18.0368	34.1509	0	0	N/A
2621.13	80180.1	79661.4	0.10682	22.0673	34.1509	0	0	N/A
2621.14	80180.8	79662.2	0.10681	25.7224	34.1492	0	0	N/A
2621.15	80181.6	79663	0.1068	22.5074	34.0187	0	0	N/A
2621.16	80182.4	79663.7	0.10679	33.3373	33.9305	0	0	N/A
2621.17	80183.1	79664.5	0.10678	41.5679	33.9305	0	0	N/A
2621.18	80183.9	79665.3	0.10677	36.5764	33.9305	0	0	N/A
2621.19	80184.7	79666.1	0.10676	24.6557	33.9078	0	0	N/A
2621.2	80185.4	79666.8	0.10675	30.3604	33.7953	0	0	N/A
2621.21	80186.2	79667.6	0.10674	42.3657	33.7953	0	0	N/A
2621.22	80187	79668.4	0.10673	36.9574	33.7953	0	0	N/A
2621.23	80187.8	79669.1	0.10672	38.7104	33.7953	0	0	N/A
2621.24	80188.5	79669.9	0.10671	44.7996	33.7953	0	0	N/A
2621.25	80189.3	79670.7	0.10671	60.899	33.9078	0	0	N/A
2621.26	80190.1	79671.4	0.1067	38.5078	33.7953	0	0	N/A
2621.27	80190.8	79672.2	0.10669	26.9279	33.7464	0	0	N/A
2621.28	80191.6	79673	0.10668	23.9604	33.3373	0	0	N/A
2621.29	80192.4	79673.8	0.10667	51.7501	33.3373	0	0	N/A
2621.3	80193.1	79674.5	0.10666	42.0183	33.7464	0	0	N/A
2621.31	80193.9	79675.3	0.10665	24.0149	33.7464	0	0	N/A
2621.32	80194.7	79676.1	0.10664	28.7317	33.7464	0	0	N/A
2621.33	80195.5	79676.8	0.10663	66.3888	33.7464	0	0	N/A
2621.34	80196.2	79677.6	0.10662	53.1131	33.3373	0	0	N/A
2621.35	80197	79678.4	0.10661	47.5313	33.3373	0	0	N/A
2621.36	80197.8	79679.1	0.1066	44.8895	33.7464	0	0	N/A
2621.37	80198.5	79679.9	0.10659	42.1228	33.7953	8.3275	0.626965	N/A
2621.38	80199.3	79680.7	0.10659	58.8526	33.9078	24.9448	1.87803	N/A
2621.39	80200.1	79681.5	0.10658	126.187	33.9305	92.2561	6.94509	N/A
2621.4	80200.8	79682.2	0.10657	208.317	33.9305	174.386	13.1267	N/A
2621.41	80201.6	79683	0.10656	176.613	34.0187	142.594	10.7325	N/A
2621.42	80202.4	79683.8	0.10655	102.229	34.0187	68.2108	5.13356	N/A
2621.43	80203.2	79684.5	0.10654	50.1031	34.1492	15.9539	1.20057	N/A
2621.44	80203.9	79685.3	0.10653	43.795	34.1509	9.64418	0.725678	40.3691
2621.45	80204.7	79686.1	0.10652	30.1442	34.1509	0	0	N/A
2621.46	80205.5	79686.8	0.10651	37.8106	34.1492	0	0	N/A
2621.47	80206.2	79687.6	0.1065	49.5714	34.0187	0	0	N/A
2621.48	80207	79688.4	0.10649	32.1501	34.0187	0	0	N/A
2621.49	80207.8	79689.2	0.10648	33.9305	34.0187	0	0	N/A
2621.5	80208.6	79689.9	0.10648	38.4442	34.1492	0	0	N/A
2621.51	80209.3	79690.7	0.10647	34.8563	34.1509	0	0	N/A
2621.52	80210.1	79691.5	0.10646	29.2486	34.1509	0	0	N/A
2621.53	80210.9	79692.2	0.10645	35.9865	34.3398	0	0	N/A
2621.54	80211.6	79693	0.10644	52.4949	34.3398	0	0	N/A
2621.55	80212.4	79693.8	0.10643	39.8852	34.3398	0	0	N/A
2621.56	80213.2	79694.6	0.10642	32.8345	34.3398	0	0	N/A
2621.57	80213.9	79695.3	0.10641	28.2144	34.1509	0	0	N/A
2621.58	80214.7	79696.1	0.1064	43.4698	34.1492	0	0	N/A
2621.59	80215.5	79696.9	0.10639	34.9697	34.1492	0	0	N/A
2621.6	80216.3	79697.6	0.10638	34.4	34.1492	0	0	N/A
2621.61	80217	79698.4	0.10637	44.9131	34.1509	0	0	N/A
2621.62	80217.8	79699.2	0.10636	34.1492	34.3398	0	0	N/A
2621.63	80218.6	79699.9	0.10636	26.8351	34.4	0	0	N/A
2621.64	80219.3	79700.7	0.10635	36.5435	34.3398	0	0	N/A
2621.65	80220.1	79701.5	0.10634	47.9952	34.3398	0	0	N/A
2621.66	80220.9	79702.3	0.10633	34.1509	34.1509	0	0	N/A
2621.67	80221.6	79703	0.10632	24.1248	34.1509	0	0	N/A
2621.68	80222.4	79703.8	0.10631	25.8317	34.1492	0	0	N/A
2621.69	80223.2	79704.6	0.1063	29.4307	34.0187	0	0	N/A
2621.7	80224	79705.3	0.10629	38.9514	34.0187	0	0	N/A
2621.71	80224.7	79706.1	0.10628	46.4382	34.0187	0	0	N/A
2621.72	80225.5	79706.9	0.10627	35.8663	34.0187	0	0	N/A
2621.73	80226.3	79707.6	0.10626	30.2552	34.0187	0	0	N/A
2621.74	80227	79708.4	0.10625	42.1685	33.9305	0	0	N/A
2621.75	80227.8	79709.2	0.10624	33.7953	33.9305	0	0	N/A
2621.76	80228.6	79710	0.10624	38.1455	33.9078	0	0	N/A
2621.77	80229.3	79710.7	0.10623	33.9078	33.9078	0	0	N/A
2621.78	80230.1	79711.5	0.10622	37.3621	33.9078	0	0	N/A
2621.79	80230.9	79712.3	0.10621	31.0815	33.9078	0	0	N/A
2621.8	80231.7	79713	0.1062	27.6927	33.9078	0	0	N/A
2621.81	80232.4	79713.8	0.10619	28.6386	33.9078	0	0	N/A
2621.82	80233.2	79714.6	0.10618	29.4696	33.7953	0	0	N/A
2621.83	80234	79715.3	0.10617	38.8811	33.7953	0	0	N/A
2621.84	80234.7	79716.1	0.10616	52.3826	33.7953	0	0	N/A
2621.85	80235.5	79716.9	0.10615	N/A	33.7953	N/A	N/A	N/A
2621.86	80236.3	79717.7	0.10614	N/A	33.9078	N/A	N/A	N/A
2621.87	80237.1	79718.4	0.10613	48.161	33.9305	0	0	N/A
2621.88	80237.8	79719.2	0.10612	58.2351	33.9305	0	0	N/A
2621.89	80238.6	79720	0.10612	54.7334	34.0187	0	0	N/A
2621.9	80239.4	79720.7	0.10611	45.3637	34.0187	0	0	N/A
2621.91	80240.1	79721.5	0.1061	30.4244	34.0187	0	0	N/A
2621.92	80240.9	79722.3	0.10609	29.1834	34.1492	0	0	N/A
2621.93	80241.7	79723.1	0.10608	25.6846	34.1509	0	0	N/A
2621.94	80242.4	79723.8	0.10607	30.4075	34.1509	0	0	N/A
2621.95	80243.2	79724.6	0.10606	38.8316	34.3398	0	0	N/A
2621.96	80244	79725.4	0.10605	46.5232	34.4	0	0	N/A
2621.97	80244.8	79726.1	0.10604	45.9649	34.3398	0	0	N/A
2621.98	80245.5	79726.9	0.10603	48.6781	34.1509	0	0	N/A
2621.99	80246.3	79727.7	0.10602	40.9385	34.3398	0	0	N/A
2622	80247.1	79728.4	0.10601	46.4803	34.4	0	0	N/A
2622.01	80247.8	79729.2	0.10603	39.4857	34.4	0	0	N/A
2622.02	80248.6	79730	0.10604	35.6183	34.4407	0	0	N/A
2622.03	80249.4	79730.8	0.10605	45.496	34.8563	0	0	N/A
2622.04	80250.1	79731.5	0.10606	33.7464	34.9697	0	0	N/A
2622.05	80250.9	79732.3	0.10607	28.6239	35.6183	0	0	N/A
2622.06	80251.7	79733.1	0.10608	25.8058	35.8663	0	0	N/A
2622.07	80252.5	79733.8	0.1061	33.0796	35.9264	0	0	N/A
2622.08	80253.2	79734.6	0.10611	30.3961	35.8663	0	0	N/A
2622.09	80254	79735.4	0.10612	20.4934	35.7423	0	0	N/A
2622.1	80254.8	79736.1	0.10613	27.7355	35.8663	0	0	N/A
2622.11	80255.5	79736.9	0.10614	51.8576	35.9264	0	0	N/A
2622.12	80256.3	79737.7	0.10616	50.7067	35.9264	0	0	N/A
2622.13	80257.1	79738.5	0.10617	42.1795	35.7423	0	0	N/A
2622.14	80257.8	79739.2	0.10618	33.0176	35.7423	0	0	N/A
2622.15	80258.6	79740	0.10619	38.9917	35.7423	0	0	N/A
2622.16	80259.4	79740.8	0.1062	28.9975	35.7423	0	0	N/A
2622.17	80260.2	79741.5	0.10621	12.5662	35.7423	0	0	N/A
2622.18	80260.9	79742.3	0.10623	14.7772	35.9264	0	0	N/A
2622.19	80261.7	79743.1	0.10624	32.0475	36.1056	0	0	N/A
2622.2	80262.5	79743.8	0.10625	38.7485	36.1056	0	0	N/A
2622.21	80263.2	79744.6	0.10626	21.1398	36.1056	0	0	N/A
2622.22	80264	79745.4	0.10627	19.7025	36.2369	0	0	N/A
2622.23	80264.8	79746.2	0.10629	19.8626	36.3962	0	0	N/A
2622.24	80265.6	79746.9	0.1063	13.1577	36.3962	0	0	N/A
2622.25	80266.3	79747.7	0.10631	34.3398	36.3962	0	0	N/A
2622.26	80267.1	79748.5	0.10632	37.0266	36.3962	0	0	N/A
2622.27	80267.9	79749.2	0.10633	34.0187	36.3962	0	0	N/A
2622.28	80268.6	79750	0.10634	36.2247	36.5435	0	0	N/A
2622.29	80269.4	79750.8	0.10636	37.6205	36.5711	0	0	N/A
2622.3	80270.2	79751.6	0.10637	44.9653	36.5988	0	0	N/A
2622.31	80270.9	79752.3	0.10638	59.3367	36.8127	0	0	N/A
2622.32	80271.7	79753.1	0.10639	50.3282	37.0104	0	0	N/A
2622.33	80272.5	79753.9	0.1064	53.9117	37.0185	0	0	N/A
2622.34	80273.3	79754.6	0.10642	40.8048	37.0266	0	0	N/A
2622.35	80274	79755.4	0.10643	29.4902	37.0901	0	0	N/A
2622.36	80274.8	79756.2	0.10644	32.0773	37.0901	0	0	N/A
2622.37	80275.6	79756.9	0.10645	22.8203	37.0185	0	0	N/A
2622.38	80276.3	79757.7	0.10646	27.6161	36.8046	0	0	N/A
2622.39	80277.1	79758.5	0.10647	33.3522	37.0185	0	0	N/A
2622.4	80277.9	79759.3	0.10649	42.5411	37.0266	0	0	N/A
2622.41	80278.6	79760	0.1065	37.8276	37.0185	0	0	N/A
2622.42	80279.4	79760.8	0.10651	30.9126	37.0266	0	0	N/A
2622.43	80280.2	79761.6	0.10652	37.1536	37.0901	0	0	N/A
2622.44	80281	79762.3	0.10653	43.5722	37.1536	0	0	N/A
2622.45	80281.7	79763.1	0.10654	44.8988	37.0901	0	0	N/A
2622.46	80282.5	79763.9	0.10656	38.0484	37.0266	0	0	N/A
2622.47	80283.3	79764.6	0.10657	23.8174	37.0901	0	0	N/A
2622.48	80284	79765.4	0.10658	23.9953	37.1536	0	0	N/A
2622.49	80284.8	79766.2	0.10659	N/A	37.1536	N/A	N/A	N/A
2622.5	80285.6	79767	0.1066	24.2404	37.2076	0	0	N/A
2622.51	80286.3	79767.7	0.10662	42.2379	37.2076	0	0	N/A
2622.52	80287.1	79768.5	0.10663	45.3278	37.2076	0	0	N/A
2622.53	80287.9	79769.3	0.10664	36.5988	37.3621	0	0	N/A
2622.54	80288.7	79770	0.10665	31.0281	37.4349	0	0	N/A
2622.55	80289.4	79770.8	0.10666	38.0893	37.6205	0	0	N/A
2622.56	80290.2	79771.6	0.10667	25.958	37.6205	0	0	N/A
2622.57	80291	79772.3	0.10669	29.8278	37.8276	0	0	N/A
2622.58	80291.7	79773.1	0.1067	27.8209	37.938	0	0	N/A
2622.59	80292.5	79773.9	0.10671	31.1119	38.0484	0	0	N/A
2622.6	80293.3	79774.7	0.10672	26.9592	38.0689	0	0	N/A
2622.61	80294	79775.4	0.10673	25.0147	38.0689	0	0	N/A
2622.62	80294.8	79776.2	0.10675	16.8813	38.0689	0	0	N/A
2622.63	80295.6	79777	0.10676	21.3785	38.1034	0	0	N/A
2622.64	80296.4	79777.7	0.10677	23.6545	38.1315	0	0	N/A
2622.65	80297.1	79778.5	0.10678	23.8534	38.1315	0	0	N/A
2622.66	80297.9	79779.3	0.10679	22.15	38.198	0	0	N/A
2622.67	80298.7	79780.1	0.1068	14.8875	38.4995	0	0	N/A
2622.68	80299.4	79780.8	0.10682	27.8425	38.7901	0	0	N/A
2622.69	80300.2	79781.6	0.10683	31.0673	38.8563	0	0	N/A
2622.7	80301	79782.4	0.10684	18.0902	38.8563	0	0	N/A
2622.71	80301.8	79783.1	0.10685	24.5215	38.9364	0	0	N/A
2622.72	80302.5	79783.9	0.10686	15.3594	39.0334	0	0	N/A
2622.73	80303.3	79784.7	0.10688	16.2469	39.1784	0	0	N/A
2622.74	80304.1	79785.4	0.10689	34.4407	39.2893	0	0	N/A
2622.75	80304.8	79786.2	0.1069	57.0199	39.1784	0	0	N/A
2622.76	80305.6	79787	0.10691	55.5217	39.1784	0	0	N/A
2622.77	80306.4	79787.8	0.10692	51.4321	39.1784	0	0	N/A
2622.78	80307.1	79788.5	0.10693	57.7068	39.1784	0	0	N/A
2622.79	80307.9	79789.3	0.10695	56.8976	39.1784	0	0	N/A
2622.8	80308.7	79790.1	0.10696	60.2257	39.1784	0	0	N/A
2622.81	80309.5	79790.8	0.10697	41.7531	39.1784	0	0	N/A
2622.82	80310.2	79791.6	0.10698	39.4656	39.2893	0	0	N/A
2622.83	80311	79792.4	0.10699	38.2505	39.2893	0	0	N/A
2622.84	80311.8	79793.1	0.10701	30.3169	39.3812	0	0	N/A
2622.85	80312.5	79793.9	0.10702	37.4349	39.4756	0	0	N/A
2622.86	80313.3	79794.7	0.10703	37.2076	39.5132	0	0	N/A
2622.87	80314.1	79795.5	0.10704	31.5487	39.5132	0	0	N/A
2622.88	80314.8	79796.2	0.10705	32.408	39.5132	0	0	N/A
2622.89	80315.6	79797	0.10706	43.5994	39.5132	0	0	N/A
2622.9	80316.4	79797.8	0.10708	65.4244	39.5132	0	0	N/A
2622.91	80317.2	79798.5	0.10709	75.2946	39.5132	0	0	N/A
2622.92	80317.9	79799.3	0.1071	75.4124	39.5407	0	0	N/A
2622.93	80318.7	79800.1	0.10711	71.3117	39.6213	0	0	N/A
2622.94	80319.5	79800.8	0.10712	48.5175	39.5407	0	0	N/A
2622.95	80320.2	79801.6	0.10713	39.5407	39.6213	0	0	N/A
2622.96	80321	79802.4	0.10715	53.6036	39.6213	0	0	N/A
2622.97	80321.8	79803.2	0.10716	54.3972	39.6213	14.776	1.1184	N/A
2622.98	80322.5	79803.9	0.10717	87.5854	39.6213	47.9642	3.63075	N/A
2622.99	80323.3	79804.7	0.10718	128.472	39.7901	88.6818	6.71359	N/A
2623	80324.1	79805.5	0.10719	120.884	40.1824	80.7016	6.1101	N/A
2623.01	80324.9	79806.2	0.10723	84.1971	40.1824	44.0147	3.33366	20.9065
2623.02	80325.6	79807	0.10727	36.249	40.1824	0	0	N/A
2623.03	80326.4	79807.8	0.10731	28.5289	39.7901	0	0	N/A
2623.04	80327.2	79808.6	0.10735	39.7018	39.6213	0	0	N/A
2623.05	80327.9	79809.3	0.10739	51.9238	39.6213	0	0	N/A
2623.06	80328.7	79810.1	0.10743	63.1161	39.7901	0	0	N/A
2623.07	80329.5	79810.9	0.10747	49.2428	39.7901	0	0	N/A
2623.08	80330.3	79811.6	0.10751	48.7881	39.7901	0	0	N/A
2623.09	80331	79812.4	0.10755	64.0281	40.1824	0	0	N/A
2623.1	80331.8	79813.2	0.10759	69.8553	40.6455	0	0	N/A
2623.11	80332.6	79813.9	0.10763	58.205	40.6455	0	0	N/A
2623.12	80333.3	79814.7	0.10767	59.9074	40.6455	0	0	N/A
2623.13	80334.1	79815.5	0.10771	54.202	41.2759	0	0	N/A
2623.14	80334.9	79816.3	0.10775	56.0215	41.75	0	0	N/A
2623.15	80335.6	79817	0.10779	45.9705	41.75	0	0	N/A
2623.16	80336.4	79817.8	0.10783	84.2946	41.75	0	0	N/A
2623.17	80337.2	79818.6	0.10787	74.2828	41.75	0	0	N/A
2623.18	80338	79819.3	0.10791	57.0607	41.75	0	0	N/A
2623.19	80338.7	79820.1	0.10795	66.8103	41.75	0	0	N/A
2623.2	80339.5	79820.9	0.10799	64.8607	41.75	0	0	N/A
2623.21	80340.3	79821.6	0.10803	49.2344	41.75	0	0	N/A
2623.22	80341	79822.4	0.10807	37.0104	41.75	0	0	N/A
2623.23	80341.8	79823.2	0.10811	45.3413	41.2759	0	0	N/A
2623.24	80342.6	79824	0.10815	49.0618	41.2759	0	0	N/A
2623.25	80343.3	79824.7	0.10818	47.0883	41.1166	0	0	N/A
2623.26	80344.1	79825.5	0.10822	25.1455	41.1166	0	0	N/A
2623.27	80344.9	79826.3	0.10826	31.9162	41.747	0	0	N/A
2623.28	80345.7	79827	0.1083	33.3207	41.75	0	0	N/A
2623.29	80346.4	79827.8	0.10834	43.2277	41.7531	0	0	N/A
2623.3	80347.2	79828.6	0.10838	53.1436	41.7778	11.3658	0.870071	N/A
2623.31	80348	79829.3	0.10842	74.0747	41.7531	32.3216	2.47522	N/A
2623.32	80348.7	79830.1	0.10846	73.9643	41.7531	32.2112	2.46765	N/A
2623.33	80349.5	79830.9	0.1085	150.713	41.7531	108.96	8.35035	N/A
2623.34	80350.3	79831.7	0.10854	164.745	41.7531	122.992	9.42913	N/A
2623.35	80351	79832.4	0.10858	113.755	41.747	72.0083	5.52254	N/A
2623.36	80351.8	79833.2	0.10862	153.587	41.747	111.84	8.58063	N/A
2623.37	80352.6	79834	0.10866	125.944	41.747	84.1971	6.46209	N/A
2623.38	80353.4	79834.7	0.1087	59.7297	41.7531	17.9765	1.3802	45.5379
2623.39	80354.1	79835.5	0.10874	40.4863	41.7531	0	0	N/A
2623.4	80354.9	79836.3	0.10878	39.075	41.7531	0	0	N/A
2623.41	80355.7	79837.1	0.10882	25.7278	41.7531	0	0	N/A
2623.42	80356.4	79837.8	0.10886	39.8785	41.747	0	0	N/A
2623.43	80357.2	79838.6	0.1089	62.421	41.747	0	0	N/A
2623.44	80358	79839.4	0.10894	54.0466	41.747	0	0	N/A
2623.45	80358.8	79840.1	0.10898	60.5574	41.747	0	0	N/A
2623.46	80359.5	79840.9	0.10902	55.871	41.747	0	0	N/A
2623.47	80360.3	79841.7	0.10906	58.8245	41.747	0	0	N/A
2623.48	80361.1	79842.4	0.1091	63.7229	41.747	21.9759	1.69347	N/A
2623.49	80361.8	79843.2	0.10914	74.6401	41.747	32.8932	2.53572	N/A
2623.5	80362.6	79844	0.10918	85.0358	41.7531	43.2827	3.33783	7.56702
2623.51	80363.4	79844.8	0.10922	N/A	41.8025	N/A	N/A	N/A
2623.52	80364.1	79845.5	0.10925	N/A	42.0988	N/A	N/A	N/A
2623.53	80364.9	79846.3	0.10929	57.1439	42.2394	0	0	N/A
2623.54	80365.7	79847.1	0.10933	53.8234	42.2394	0	0	N/A
2623.55	80366.5	79847.8	0.10937	58.5511	42.2394	0	0	N/A
2623.56	80367.2	79848.6	0.10941	71.167	42.2394	0	0	N/A
2623.57	80368	79849.4	0.10945	62.9104	42.2394	0	0	N/A
2623.58	80368.8	79850.1	0.10949	48.2783	42.2394	0	0	N/A
2623.59	80369.5	79850.9	0.10953	50.1045	42.2394	0	0	N/A
2623.6	80370.3	79851.7	0.10957	32.3158	42.2394	0	0	N/A
2623.61	80371.1	79852.5	0.10961	39.2818	42.2394	0	0	N/A
2623.62	80371.8	79853.2	0.10965	39.2968	42.2394	0	0	N/A
2623.63	80372.6	79854	0.10969	43.6615	42.2394	0	0	N/A
2623.64	80373.4	79854.8	0.10973	48.8214	42.2394	0	0	N/A
2623.65	80374.2	79855.5	0.10977	31.7669	42.2394	0	0	N/A
2623.66	80374.9	79856.3	0.10981	29.1867	42.0988	0	0	N/A
2623.67	80375.7	79857.1	0.10985	35.4621	41.8025	0	0	N/A
2623.68	80376.5	79857.8	0.10989	49.877	41.7531	0	0	N/A
2623.69	80377.2	79858.6	0.10993	54.9695	41.747	0	0	N/A
2623.7	80378	79859.4	0.10997	50.6292	40.7416	0	0	N/A
2623.71	80378.8	79860.2	0.11001	41.8025	40.4863	0	0	N/A
2623.72	80379.5	79860.9	0.11005	44.5086	40.457	0	0	N/A
2623.73	80380.3	79861.7	0.11009	37.7033	40.457	0	0	N/A
2623.74	80381.1	79862.5	0.11013	46.1832	40.457	0	0	N/A
2623.75	80381.9	79863.2	0.11017	43.1188	40.457	0	0	N/A
2623.76	80382.6	79864	0.11021	46.315	40.457	0	0	N/A
2623.77	80383.4	79864.8	0.11025	51.6565	40.457	0	0	N/A
2623.78	80384.2	79865.6	0.11029	51.5352	40.4863	0	0	N/A
2623.79	80384.9	79866.3	0.11032	56.8063	40.7416	0	0	N/A
2623.8	80385.7	79867.1	0.11036	69.8873	40.4863	0	0	N/A
2623.81	80386.5	79867.9	0.1104	64.8894	40.457	0	0	N/A
2623.82	80387.3	79868.6	0.11044	56.5821	40.3205	16.2617	1.26852	N/A
2623.83	80388	79869.4	0.11048	111.041	40.3205	70.7201	5.51865	N/A
2623.84	80388.8	79870.2	0.11052	88.1998	40.3205	47.8793	3.73762	N/A
2623.85	80389.6	79870.9	0.11056	49.9384	40.3205	9.61791	0.751089	11.2759
2623.86	80390.3	79871.7	0.1106	26.2943	40.457	0	0	N/A
2623.87	80391.1	79872.5	0.11064	24.2058	40.457	0	0	N/A
2623.88	80391.9	79873.3	0.11068	37.0795	40.4717	0	0	N/A
2623.89	80392.6	79874	0.11072	52.6797	40.457	0	0	N/A
2623.9	80393.4	79874.8	0.11076	48.3898	40.4717	0	0	N/A
2623.91	80394.2	79875.6	0.1108	36.8794	40.4863	0	0	N/A
2623.92	80395	79876.3	0.11084	N/A	40.4717	N/A	N/A	N/A
2623.93	80395.7	79877.1	0.11088	37.7589	40.4717	0	0	N/A
2623.94	80396.5	79877.9	0.11092	20.5446	40.4717	0	0	N/A
2623.95	80397.3	79878.6	0.11096	38.5059	40.4717	0	0	N/A
2623.96	80398	79879.4	0.111	56.4976	40.3888	0	0	N/A
2623.97	80398.8	79880.2	0.11104	35.0572	40.2806	0	0	N/A
2623.98	80399.6	79881	0.11108	38.1628	40.2407	0	0	N/A
2623.99	80400.3	79881.7	0.11112	55.7687	40.2407	0	0	N/A
2624	80401.1	79882.5	0.11116	41.747	40.2407	0	0	N/A
2624.01	80401.9	79883.3	0.11116	28.1607	40.2407	0	0	N/A
2624.02	80402.7	79884	0.11117	22.72	40.2407	0	0	N/A
2624.03	80403.4	79884.8	0.11117	53.2562	40.0596	0	0	N/A
2624.04	80404.2	79885.6	0.11117	51.3452	39.5876	0	0	N/A
2624.05	80405	79886.3	0.11118	34.2549	39.2893	0	0	N/A
2624.06	80405.7	79887.1	0.11118	30.4199	39.1784	0	0	N/A
2624.07	80406.5	79887.9	0.11119	27.7583	39.075	0	0	N/A
2624.08	80407.3	79888.7	0.11119	36.5564	38.7904	0	0	N/A
2624.09	80408	79889.4	0.1112	36.9759	38.5059	0	0	N/A
2624.1	80408.8	79890.2	0.1112	33.457	38.3343	0	0	N/A
2624.11	80409.6	79891	0.1112	43.1082	38.3343	0	0	N/A
2624.12	80410.4	79891.7	0.11121	42.2394	38.3343	0	0	N/A
2624.13	80411.1	79892.5	0.11121	32.9962	38.3343	0	0	N/A
2624.14	80411.9	79893.3	0.11122	44.0741	38.0981	0	0	N/A
2624.15	80412.7	79894.1	0.11122	34.3029	37.9595	0	0	N/A
2624.16	80413.4	79894.8	0.11123	31.9723	37.8222	0	0	N/A
2624.17	80414.2	79895.6	0.11123	54.2756	37.9595	16.3161	1.28189	N/A
2624.18	80415	79896.4	0.11123	74.7182	38.0981	36.6201	2.87706	N/A
2624.19	80415.8	79897.1	0.11124	106.025	38.3343	67.6905	5.31858	N/A
2624.2	80416.5	79897.9	0.11124	125.184	38.3343	86.85	6.82398	N/A
2624.21	80417.3	79898.7	0.11125	75.4621	38.5059	36.9562	2.90402	19.2055
2624.22	80418.1	79899.4	0.11125	34.4245	38.582	0	0	N/A
2624.23	80418.8	79900.2	0.11126	40.3205	38.5059	0	0	N/A
2624.24	80419.6	79901	0.11126	26.564	38.582	0	0	N/A
2624.25	80420.4	79901.8	0.11127	35.6105	38.6582	0	0	N/A
2624.26	80421.1	79902.5	0.11127	53.5589	38.8666	0	0	N/A
2624.27	80421.9	79903.3	0.11127	35.6001	39.075	0	0	N/A
2624.28	80422.7	79904.1	0.11128	44.0875	39.1784	0	0	N/A
2624.29	80423.5	79904.8	0.11128	35.891	39.2818	0	0	N/A
2624.3	80424.2	79905.6	0.11129	34.2201	39.2818	0	0	N/A
2624.31	80425	79906.4	0.11129	25.1427	39.2968	0	0	N/A
2624.32	80425.8	79907.1	0.1113	25.934	39.6303	0	0	N/A
2624.33	80426.5	79907.9	0.1113	43.2989	39.6303	0	0	N/A
2624.34	80427.3	79908.7	0.1113	40.457	39.6303	0	0	N/A
2624.35	80428.1	79909.5	0.11131	28.5514	39.6303	0	0	N/A
2624.36	80428.8	79910.2	0.11131	21.2347	39.6303	0	0	N/A
2624.37	80429.6	79911	0.11132	14.2588	39.6303	0	0	N/A
2624.38	80430.4	79911.8	0.11132	20.1965	39.6303	0	0	N/A
2624.39	80431.2	79912.5	0.11133	30.4513	39.4636	0	0	N/A
2624.4	80431.9	79913.3	0.11133	42.0988	39.2968	0	0	N/A
2624.41	80432.7	79914.1	0.11133	61.0053	39.4636	0	0	N/A
2624.42	80433.5	79914.8	0.11134	61.5924	39.4636	0	0	N/A
2624.43	80434.2	79915.6	0.11134	66.4028	39.4636	0	0	N/A
2624.44	80435	79916.4	0.11135	N/A	39.4636	N/A	N/A	N/A
2624.45	80435.8	79917.2	0.11135	N/A	39.4636	N/A	N/A	N/A
2624.46	80436.5	79917.9	0.11136	N/A	39.4636	N/A	N/A	N/A
2624.47	80437.3	79918.7	0.11136	N/A	39.4636	N/A	N/A	N/A
2624.48	80438.1	79919.5	0.11136	40.7416	39.4636	0	0	N/A
2624.49	80438.9	79920.2	0.11137	27.4253	39.4636	0	0	N/A
2624.5	80439.6	79921	0.11137	27.5817	39.4636	0	0	N/A
2624.51	80440.4	79921.8	0.11138	28.9284	39.9355	0	0	N/A
2624.52	80441.2	79922.5	0.11138	25.1953	40.2407	0	0	N/A
2624.53	80441.9	79923.3	0.11139	18.6965	40.2407	0	0	N/A
2624.54	80442.7	79924.1	0.11139	28.8827	40.2407	0	0	N/A
2624.55	80443.5	79924.9	0.11139	27.6686	40.2407	0	0	N/A
2624.56	80444.3	79925.6	0.1114	27.3034	40.2407	0	0	N/A
2624.57	80445	79926.4	0.1114	27.0547	40.2407	0	0	N/A
2624.58	80445.8	79927.2	0.11141	23.8518	40.2806	0	0	N/A
2624.59	80446.6	79927.9	0.11141	22.7086	40.2806	0	0	N/A
2624.6	80447.3	79928.7	0.11142	22.339	40.2806	0	0	N/A
2624.61	80448.1	79929.5	0.11142	15.2171	40.2806	0	0	N/A
2624.62	80448.9	79930.3	0.11142	21.7134	40.2806	0	0	N/A
2624.63	80449.6	79931	0.11143	22.4575	40.2806	0	0	N/A
2624.64	80450.4	79931.8	0.11143	27.2418	40.3888	0	0	N/A
2624.65	80451.2	79932.6	0.11144	27.2172	40.3888	0	0	N/A
2624.66	80452	79933.3	0.11144	25.8839	40.3888	0	0	N/A
2624.67	80452.7	79934.1	0.11145	23.4027	40.3888	0	0	N/A
2624.68	80453.5	79934.9	0.11145	47.8649	40.3888	0	0	N/A
2624.69	80454.3	79935.6	0.11146	56.3039	40.3888	0	0	N/A
2624.7	80455	79936.4	0.11146	35.6882	40.3888	0	0	N/A
2624.71	80455.8	79937.2	0.11146	34.4688	40.3888	0	0	N/A
2624.72	80456.6	79938	0.11147	36.7669	40.3888	0	0	N/A
2624.73	80457.3	79938.7	0.11147	40.6125	40.457	0	0	N/A
2624.74	80458.1	79939.5	0.11148	75.058	40.5348	0	0	N/A
2624.75	80458.9	79940.3	0.11148	68.1438	40.6125	0	0	N/A
2624.76	80459.7	79941	0.11149	48.0034	40.677	0	0	N/A
2624.77	80460.4	79941.8	0.11149	44.3496	40.9052	0	0	N/A
2624.78	80461.2	79942.6	0.11149	41.2094	40.9052	0	0	N/A
2624.79	80462	79943.3	0.1115	37.8856	41.1078	0	0	N/A
2624.8	80462.7	79944.1	0.1115	53.1132	41.1078	0	0	N/A
2624.81	80463.5	79944.9	0.11151	41.2984	41.1078	0	0	N/A
2624.82	80464.3	79945.7	0.11151	38.0334	41.1662	0	0	N/A
2624.83	80465	79946.4	0.11152	31.4339	41.1662	0	0	N/A
2624.84	80465.8	79947.2	0.11152	33.2338	41.1975	0	0	N/A
2624.85	80466.6	79948	0.11152	33.3625	41.2539	0	0	N/A
2624.86	80467.4	79948.7	0.11153	28.3661	41.4413	0	0	N/A
2624.87	80468.1	79949.5	0.11153	36.9077	41.4413	0	0	N/A
2624.88	80468.9	79950.3	0.11154	25.7913	41.6142	0	0	N/A
2624.89	80469.7	79951	0.11154	23.0816	41.6956	0	0	N/A
2624.9	80470.4	79951.8	0.11155	35.7054	41.6956	0	0	N/A
2624.91	80471.2	79952.6	0.11155	42.6734	41.8715	0	0	N/A
2624.92	80472	79953.4	0.11155	41.1468	42.1691	0	0	N/A
2624.93	80472.8	79954.1	0.11156	29.6872	42.4564	0	0	N/A
2624.94	80473.5	79954.9	0.11156	19.2021	42.4564	0	0	N/A
2624.95	80474.3	79955.7	0.11157	24.2318	42.4564	0	0	N/A
2624.96	80475.1	79956.4	0.11157	23.3359	42.7352	0	0	N/A
2624.97	80475.8	79957.2	0.11158	56.4037	42.9526	13.4511	1.06011	N/A
2624.98	80476.6	79958	0.11158	84.4789	43.1835	41.2953	3.25462	N/A
2624.99	80477.4	79958.8	0.11158	96.8568	43.2789	53.5779	4.22259	N/A
2625	80478.1	79959.5	0.11159	69.0362	43.5816	25.4546	2.00631	10.5436
2625.01	80478.9	79960.3	0.11158	N/A	43.9692	N/A	N/A	N/A
2625.02	80479.7	79961.1	0.11157	47.5377	44.0808	0	0	N/A
2625.03	80480.5	79961.8	0.11156	28.1707	44.2186	0	0	N/A
2625.04	80481.2	79962.6	0.11155	16.2535	44.4682	0	0	N/A
2625.05	80482	79963.4	0.11154	23.339	44.6855	0	0	N/A
2625.06	80482.8	79964.1	0.11153	32.8622	44.8829	0	0	N/A
2625.07	80483.5	79964.9	0.11152	40.2407	45.0887	0	0	N/A

## Sheet: 2 -- NGRIP_IC
NGRIP BottomDepth (m)	NGRIP TopDepth (m)	GICC05 BottomAge (yr BP)	GICC05 TopAge (yr BP)	AICC2012 BottomAge (yr BP)	AICC2012 TopAge (yr BP)	ACC (ie/yr)	NGRIP SO42- (ng/g)	Background SO42- (ng/g)	Volcanic SO42- (ng/g)	Volcanic SO42- Deposition (kg/km2)	Cumulative Volcanic SO42- (kg/km2)
2619.5	2619.28	80054.5	80037.6	79537	79520.1	0.10714	118.5	96	0	0	N/A
2619.28	2619.25	80037.6	80035.2	79520.1	79517.8	0.10714	201.5	96	105.5	23.9515	N/A
2619.25	2619.22	80035.2	80032.9	79517.8	79515.5	0.10714	244.5	96	148.5	33.7138	N/A
2619.22	2619.19	80032.9	80030.6	79515.5	79513.2	0.10714	427	96	331	75.1466	N/A
2619.19	2619.16	80030.6	80028.3	79513.2	79510.8	0.10714	562	96	466	105.795	N/A
2619.16	2619.13	80028.3	80026	79510.8	79508.5	0.10714	587	96	491	112.891	N/A
2619.13	2619.1	80026	80023.6	79508.5	79506.1	0.10714	314	96	218	50.9475	N/A
2619.1	2619.07	80023.6	80021.2	79506.1	79503.7	0.10714	246	96	150	35.0557	437.502
2619.07	2619.04	80021.2	80018.8	79503.7	79501.4	0.10714	96	96	0	0	N/A
2619.04	2619.01	80018.8	80016.5	79501.4	79499	0.10714	84	96	0	0	N/A
2619.01	2618.98	80016.5	80014.1	79499	79496.6	0.10714	100	96	0	0	N/A
2618.98	2618.95	80014.1	80011.7	79496.6	79494.2	0.10714	103	96	0	0	N/A
2618.95	2618.92	80011.7	80009.3	79494.2	79491.9	0.10714	89	96	0	0	N/A
2618.92	2618.89	80009.3	80006.9	79491.9	79489.5	0.10714	80	96	0	0	N/A

## Sheet: 3 -- NEEM_IC
NEEM BottomDepth (m)	NEEM TopDepth (m)	GICC05 BottomAge (yr BP)	GICC05 TopAge (yr BP)	AICC2012 BottomAge (yr BP)	AICC2012 TopAge (yr BP)	ACC (ie/yr)	NEEM SO42- (ng/g)	Background SO42- (ng/g)	Volcanic SO42- (ng/g)	Volcanic SO42- Deposition (kg/km2)	Cumulative Volcanic SO42- (kg/km2)
2049.85	2049.65	80094.7	80066.3	79576.7	79548.3	0.0868061	119	115.5	0	0	N/A
2049.65	2049.62	80066.3	80062	79548.3	79544	0.0868061	148	115.5	32.5	11.0409	N/A
2049.62	2049.59	80062	80057.7	79544	79539.7	0.0868061	323	115.5	207.5	70.4922	81.5331
2049.59	2049.56	80057.7	80053.5	79539.7	79535.5	0.0868061	112	115.5	0	0	N/A
2049.56	2049.53	80053.5	80049.2	79535.5	79531.2	0.0868061	89	115.5	0	0	N/A
2049.53	2049.5	80049.2	80044.9	79531.2	79526.9	0.0868061	163	115.5	0	0	N/A
2049.5	2049.47	80044.9	80040.7	79526.9	79522.7	0.0868061	124	115.5	0	0	N/A
2049.47	2049.44	80040.7	80036.4	79522.7	79518.4	0.0868061	256	115.5	140.5	47.7307	N/A
2049.44	2049.41	80036.4	80032.1	79518.4	79514.1	0.0868061	323	115.5	207.5	70.492	N/A
2049.41	2049.38	80032.1	80027.9	79514.1	79509.9	0.0868061	414	115.5	298.5	101.407	N/A
2049.38	2049.35	80027.9	80023.1	79509.9	79505.1	0.0868061	330	115.5	214.5	81.1279	N/A
2049.35	2049.32	80023.1	80018.2	79505.1	79500.2	0.0868061	196	115.5	80.5	31.2214	331.979
2049.32	2049.3	80018.2	80015	79500.2	79497	0.0868061	100	115.5	0	0	N/A
2049.3	2049.27	80015	80010.1	79497	79492.1	0.0868061	136	115.5	0	0	N/A
2049.27	2049.24	80010.1	80005.2	79492.1	79487.2	0.0868061	158	115.5	0	0	N/A
2049.24	2049.21	80005.2	80000.4	79487.2	79482.4	0.0868061	194	115.5	0	0	N/A
2049.21	2049.02	80000.4	79969.5	79482.4	79451.5	0.0868061	132.5	115.5	0	0	N/A

## Sheet: 4 -- GISP2_ICP-MS
GISP2 Depth (m)	AICC2012 Age (yr BP) synched with EDC	ACC (ie/yr)	Particle 2.6-4.5 mm (mg/g)	Particle 4.5-9.5 mm (mg/g)	S (ng/g)	nssS (ng/g)	Background SO42- [101-pt RRM] (ng/g)	Volcanic SO42- (ng/g)	Volcanic SO42- Deposition (kg/km2)	Cumulative Volcanic SO42- (kg/km2)
2635.01	79340	0.119799	0.0399	0.0213	13.211	12.2509	14.368	0	0	N/A
2635.01	79341.4	0.119799	0.0378	0.023	13.341	12.3437	14.368	0	0	N/A
2635.03	79342.9	0.119799	0.0353	0.0131	14.972	13.9109	14.368	0	0	N/A
2635.03	79344.3	0.119799	0.032	0.0173	15.724	14.6724	14.368	0	0	N/A
2635.05	79345.8	0.119799	0.0433	0.0273	16.811	15.9388	14.368	0	0	N/A
2635.05	79347.2	0.119799	0.0468	0.0328	16.485	15.5675	14.368	0	0	N/A
2635.07	79348.7	0.119799	0.0394	0.0211	15.972	14.9888	14.368	0	0	N/A
2635.07	79350.2	0.119799	0.0289	0.0145	18.55	17.584	14.368	0	0	N/A
2635.09	79351.6	0.119799	0.0311	0.0162	15.255	14.2912	14.368	0	0	N/A
2635.09	79353.1	0.119799	0.0394	0.0201	16.033	14.9834	14.368	0	0	N/A
2635.11	79354.5	0.119799	0.0413	0.0205	17.517	16.4339	14.368	0	0	N/A
2635.11	79356	0.119799	0.0596	0.0365	21.973	20.9821	14.368	0	0	N/A
2635.12	79357.4	0.119799	0.0973	0.053	20.916	20.0044	14.368	0	0	N/A
2635.14	79358.9	0.119799	0.0857	0.0512	18.692	17.6341	14.368	0	0	N/A
2635.14	79360.4	0.119799	0.0419	0.0267	15.02	14.368	14.368	0	0	N/A
2635.16	79361.8	0.119799	0.0686	0.0412	15.086	14.5165	14.368	0	0	N/A
2635.16	79363.3	0.119799	0.0632	0.0397	15.216	14.6276	14.368	0	0	N/A
2635.18	79364.7	0.119799	0.0465	0.0268	15.477	14.6073	14.368	0	0	N/A
2635.18	79366.2	0.119799	0.0371	0.0131	17.342	16.6789	14.368	0	0	N/A
2635.2	79367.6	0.119799	0.0562	0.0302	16.194	15.5126	14.368	0	0	N/A
2635.2	79369.1	0.119799	0.0568	0.0353	17.88	16.078	14.368	0	0	N/A
2635.22	79370.6	0.119799	0.048	0.0244	18.115	17.0959	14.368	0	0	N/A
2635.22	79372	0.119799	0.0554	0.035	19.462	18.2587	14.368	0	0	N/A
2635.24	79373.5	0.119799	0.0425	0.0295	15.153	14.1266	14.368	0	0	N/A
2635.24	79374.9	0.119799	0.0289	0.0263	14.855	13.9299	14.368	0	0	N/A
2635.26	79376.4	0.119799	0.0286	0.016	14.395	13.3837	14.368	0	0	N/A
2635.26	79377.8	0.119799	0.0299	0.016	13.751	12.8827	14.368	0	0	N/A
2635.28	79379.3	0.119799	0.023	0.0138	11.997	11.0266	14.368	0	0	N/A
2635.28	79380.8	0.119799	0.0244	0.0125	11.911	10.959	14.368	0	0	N/A
2635.3	79382.2	0.119799	0.0283	0.0139	14.083	12.9537	14.368	0	0	N/A
2635.3	79383.7	0.119799	0.0323	0.02	13.74	12.4061	14.368	0	0	N/A
2635.32	79385.1	0.119799	0.0328	0.0194	13.859	12.2799	14.368	0	0	N/A
2635.32	79386.6	0.119799	0.0396	0.0244	14.201	12.5551	14.368	0	0	N/A
2635.34	79388	0.119799	0.0473	0.0315	16.189	14.2831	14.368	0	0	N/A
2635.34	79389.5	0.119799	0.0456	0.0286	14.872	13.3376	14.368	0	0	N/A
2635.36	79390.9	0.119799	0.0464	0.0342	15.152	13.8321	14.368	0	0	N/A
2635.36	79392.4	0.119799	0.046	0.0423	19.402	18.1177	14.368	0	0	N/A
2635.38	79393.9	0.119799	0.0711	0.0677	21.03	19.645	14.368	0	0	N/A
2635.39	79395.3	0.119799	0.378	0.838	22.228	20.8953	14.368	0	0	N/A
2635.39	79396.8	0.119799	0.0671	0.0682	19.296	18.277	14.368	0	0	N/A
2635.41	79398.2	0.119799	0.0414	0.0333	14.071	13.3229	14.368	0	0	N/A
2635.41	79399.7	0.119799	0.0377	0.0225	13.224	12.5684	14.368	0	0	N/A
2635.43	79401.1	0.119799	0.0351	0.0192	12.114	11.4356	14.368	0	0	N/A
2635.43	79402.6	0.119799	0.0354	0.0208	13.669	12.9682	14.368	0	0	N/A
2635.45	79404.1	0.119799	0.0386	0.0367	13.279	12.5882	14.368	0	0	N/A
2635.45	79405.5	0.119799	0.0357	0.0307	15.064	14.4016	14.368	0	0	N/A
2635.47	79407	0.119799	0.0294	0.0241	17.107	16.1365	14.368	0	0	N/A
2635.47	79408.4	0.119799	0.0419	0.022	18.849	18.0138	14.368	0	0	N/A
2635.49	79409.9	0.119799	0.0735	0.0556	21.175	20.2861	14.368	0	0	N/A
2635.49	79411.3	0.119799	0.1132	0.0953	17.425	16.6055	14.368	0	0	N/A
2635.51	79412.8	0.119799	0.0653	0.0567	14.894	13.8243	14.368	0	0	N/A
2635.51	79414.3	0.119799	0.0235	0.0198	13.713	12.9729	14.368	0	0	N/A
2635.53	79415.7	0.119799	0.0318	0.0292	13.884	13.1625	14.368	0	0	N/A
2635.53	79417.2	0.119799	0.0386	0.0242	16.388	15.3737	14.368	0	0	N/A
2635.55	79418.6	0.119799	0.0326	0.0168	21.018	19.9628	14.2912	0	0	N/A
2635.55	79420.1	0.119799	0.0588	0.0395	22.825	21.7135	14.2912	0	0	N/A
2635.57	79421.5	0.119799	0.0403	0.0209	24.099	23.0722	14.2912	0	0	N/A
2635.57	79423	0.119799	0.0308	0.0178	22.142	21.2106	14.2912	0	0	N/A
2635.59	79424.5	0.119799	0.0364	0.0224	20.204	19.3162	14.2912	0	0	N/A
2635.59	79425.8	0.132135	0.0431	0.0151	20.585	19.781	14.368	16.239	2.59881	N/A
2635.61	79427	0.141875	0.0416	0.0239	21.097	20.3733	14.368	18.0159	2.88317	N/A
2635.61	79428.2	0.141875	0.0456	0.0297	26.517	25.692	14.2831	34.2267	5.47747	N/A
2635.62	79429.5	0.141875	0.0411	0.0185	26.949	24.4144	14.1266	30.8634	4.93922	N/A
2635.64	79430.7	0.141874	0.0328	0.02	30.026	29.134	13.9299	45.6123	7.29956	N/A
2635.64	79431.9	0.141875	0.054	0.0343	30.439	29.3909	13.8321	46.6764	7.46985	N/A
2635.66	79433.2	0.141875	0.04	0.0333	32.205	31.1062	13.8243	51.8457	8.29712	N/A
2635.66	79434.4	0.141875	0.0388	0.0262	33.323	32.1186	13.6947	55.2717	8.8454	N/A
2635.68	79435.6	0.141875	0.0474	0.0339	27.832	26.7504	13.5694	39.543	6.32826	N/A
2635.68	79436.8	0.141875	0.0482	0.0314	24.333	23.3576	13.4657	29.6757	4.74915	N/A
2635.7	79438.1	0.141875	0.0532	0.03	21.179	20.2252	13.4358	20.3682	3.25962	N/A
2635.7	79439.3	0.141874	0.0722	0.0523	19.535	18.6495	13.4358	15.6411	2.50312	N/A
2635.72	79440.5	0.141875	0.0873	0.0678	18.489	17.6025	13.4358	12.5001	2.00045	N/A
2635.72	79441.8	0.141875	0.0488	0.0304	17.179	16.3712	13.4097	8.88435	1.42181	68.073
2635.74	79443	0.141875	0.0441	0.0283	18.939	18.1144	13.3837	0	0	N/A
2635.74	79444.2	0.141875	0.0394	0.0239	21.794	20.9679	13.3606	0	0	N/A
2635.76	79445.5	0.141875	0.0545	0.0296	20.642	19.5632	13.3376	0	0	N/A
2635.76	79446.7	0.141875	0.0617	0.0302	18.451	17.6503	13.3302	0	0	N/A
2635.78	79447.9	0.141875	0.0898	0.074	15.788	14.9454	13.3376	0	0	N/A
2635.78	79449.1	0.141874	0.0427	0.0251	13.308	12.5729	13.3867	0	0	N/A
2635.8	79450.4	0.141875	0.0297	0.0184	10.737	10.0115	13.4358	0	0	N/A
2635.8	79451.6	0.141875	0.0243	0.0184	11.491	10.8161	13.4507	0	0	N/A
2635.82	79452.8	0.141875	0.0242	0.0141	10.993	10.6673	13.4657	0	0	N/A
2635.82	79454.1	0.141875	0.0346	0.0177	11.093	10.4521	13.5175	0	0	N/A
2635.84	79455.3	0.141875	0.0351	0.0148	10.879	10.2035	13.5694	0	0	N/A
2635.84	79456.5	0.141875	0.0286	0.0226	10.169	9.7426	13.5175	0	0	N/A
2635.86	79457.8	0.141875	0.0278	0.0148	9.874	8.4942	13.5694	0	0	N/A
2635.86	79459	0.141874	0.0262	0.0103	10.513	9.9174	13.5175	0	0	N/A
2635.88	79460.2	0.141875	0.0262	0.0147	11.185	10.5058	13.5175	0	0	N/A
2635.89	79461.4	0.141875	0.0325	0.0169	13.573	12.8239	13.5175	0	0	N/A
2635.89	79462.7	0.141875	0.0344	0.0159	13.823	13.0297	13.5175	0	0	N/A
2635.91	79463.9	0.141875	0.0384	0.0189	15.344	14.5533	13.5175	0	0	N/A
2635.91	79465.1	0.141875	0.0317	0.0201	14.594	13.6947	13.632	0	0	N/A
2635.93	79466.4	0.141875	0.0263	0.0198	15.995	15.1724	13.7548	0	0	N/A
2635.93	79467.6	0.141874	0.0338	0.0119	16.864	16.0431	13.8196	0	0	N/A
2635.95	79468.8	0.141875	0.0635	0.0396	18.504	17.6851	14.1129	0	0	N/A
2635.95	79470.1	0.141875	0.069	0.0465	16.562	15.7374	14.1129	0	0	N/A
2635.97	79471.3	0.141875	0.0381	0.0185	13.281	12.5323	13.8821	0	0	N/A
2635.97	79472.5	0.141875	0.0413	0.0199	14.021	13.2138	13.8821	0	0	N/A
2635.99	79473.7	0.141875	0.0507	0.0241	14.052	13.1935	13.8821	0	0	N/A
2635.99	79475	0.141875	0.0524	0.0313	13.197	12.3824	13.8821	0	0	N/A
2636.01	79476.2	0.141875	0.047	0.0249	12.535	11.7625	13.8821	0	0	N/A
2636.01	79477.4	0.141874	0.0399	0.028	12.177	11.4713	14.2466	0	0	N/A
2636.03	79478.7	0.141875	0.0345	0.02	12.911	12.1539	14.7493	0	0	N/A
2636.03	79479.9	0.141875	0.0284	0.016	14.238	13.4358	15.0002	0	0	N/A
2636.05	79481.1	0.141875	0.0339	0.0204	14.477	13.5694	15.0002	0	0	N/A
2636.05	79482.4	0.141875	0.0424	0.0321	16.565	15.5659	15.0002	0	0	N/A
2636.07	79483.6	0.141875	0.0361	0.0198	18.634	17.8234	15.0002	0	0	N/A
2636.07	79484.8	0.141875	0.0355	0.019	19.442	18.6038	15.0002	0	0	N/A
2636.09	79486.1	0.141875	0.0402	0.0193	18.971	18.1654	15.0002	0	0	N/A
2636.09	79487.3	0.141874	0.0495	0.0449	18.864	17.9004	14.7493	0	0	N/A
2636.11	79488.5	0.141875	0.0579	0.0352	16.463	15.3142	14.5533	0	0	N/A
2636.11	79489.7	0.141875	0.0611	0.0321	14.582	13.4657	14.2466	0	0	N/A
2636.12	79491	0.141875	0.0731	0.0471	13.513	12.5207	14.1215	0	0	N/A
2636.14	79492.2	0.141875	0.0636	0.045	13.503	12.465	14.3374	0	0	N/A
2636.14	79493.4	0.141875	0.0304	0.024	12.142	10.8804	14.5533	0	0	N/A
2636.16	79494.7	0.141875	0.0277	0.0158	10.717	9.9033	14.7493	0	0	N/A
2636.16	79495.9	0.141874	0.0285	0.0185	9.727	8.992	14.9454	0	0	N/A
2636.18	79497.1	0.141875	0.0315	0.0162	10.089	9.3275	15.0002	0	0	N/A
2636.18	79498.4	0.141875	0.0285	0.0112	11.111	10.2578	15.055	0	0	N/A
2636.2	79499.6	0.141875	0.033	0.0158	12.801	11.9435	15.1137	0	0	N/A
2636.2	79500.8	0.141875	0.0676	0.0398	14.522	13.8149	15.1724	0	0	N/A
2636.22	79502	0.141875	0.0421	0.0265	17	16.3966	15.1727	0	0	N/A
2636.22	79503.3	0.141875	0.0343	0.0143	19.951	19.3592	15.173	12.5586	2.00981	N/A
2636.24	79504.5	0.141875	0.0452	0.0256	27.091	26.4658	15.2436	33.6666	5.38783	N/A
2636.24	79505.7	0.141874	0.056	0.0263	37.891	37.1279	15.2436	65.6529	10.5068	N/A
2636.26	79507	0.141875	0.0358	0.0186	63.182	62.2767	15.2436	141.099	22.5808	N/A
2636.26	79508.2	0.141875	0.0398	0.0233	72.187	71.2113	15.2436	167.903	26.8704	N/A
2636.28	79509.4	0.141875	0.0473	0.033	84.093	83.0609	15.2436	203.452	32.5594	N/A
2636.28	79510.7	0.137509	0.0336	0.0124	94.227	92.9627	15.3743	232.765	37.2506	N/A
2636.3	79512	0.133405	0.0281	0.0125	101.19	99.6489	15.5001	252.446	40.4002	N/A
2636.3	79513.3	0.133405	0.0301	0.0164	96.98	95.2805	15.6517	238.887	38.2302	N/A
2636.32	79514.6	0.133406	0.0353	0.0219	87.09	85.655	15.7391	209.748	33.5669	N/A
2636.32	79515.9	0.133405	0.0323	0.0153	72.673	71.5097	15.755	167.264	26.7681	N/A
2636.34	79517.2	0.133405	0.0361	0.0201	53.209	52.2983	15.755	109.63	17.5446	N/A
2636.34	79518.5	0.133405	0.0467	0.0191	38.314	37.5627	15.755	65.4232	10.47	N/A
2636.36	79519.8	0.133405	0.0489	0.0238	25.41	24.5672	15.755	26.4367	4.2308	N/A
2636.36	79521.2	0.133405	0.0538	0.0355	21.055	20.1868	15.755	13.2956	2.12775	310.504
2636.38	79522.5	0.133406	0.046	0.0335	23.286	22.3827	15.755	0	0	N/A
2636.39	79523.8	0.133405	0.0548	0.0317	22.332	21.5679	15.755	0	0	N/A
2636.39	79525.1	0.133405	0.0756	0.0468	20.288	19.593	15.755	0	0	N/A
2636.41	79526.4	0.133405	0.0739	0.0424	18.521	17.6346	15.755	0	0	N/A
2636.41	79527.7	0.133405	0.0827	0.0523	16.982	15.9689	15.755	0	0	N/A
2636.43	79529	0.133405	0.0875	0.0583	16.989	16.1045	15.755	0	0	N/A
2636.43	79530.3	0.133406	0.1025	0.06	16.586	15.769	15.755	0	0	N/A
2636.45	79531.6	0.133405	0.0847	0.044	15.842	15.055	15.7391	0	0	N/A
2636.45	79532.9	0.133405	0.0441	0.0299	14.264	13.3518	15.6517	0	0	N/A
2636.47	79534.2	0.133405	0.0382	0.0199	14.919	13.9399	15.5421	0	0	N/A
2636.47	79535.5	0.133405	0.0322	0.0163	17.366	16.2256	15.5421	0	0	N/A
2636.49	79536.9	0.133405	0.0278	0.0132	19.288	18.3568	15.5421	0	0	N/A
2636.49	79538.2	0.133405	0.0342	0.0155	24.518	23.7454	15.6302	0	0	N/A
2636.51	79539.5	0.133406	0.0321	0.0253	22.616	21.7892	15.6302	0	0	N/A
2636.51	79540.8	0.133405	0.042	0.0204	21.318	20.588	15.6302	0	0	N/A
2636.53	79542.1	0.133405	0.0582	0.033	20.542	19.8655	15.7176	0	0	N/A
2636.53	79543.4	0.133405	0.0555	0.0392	17.196	16.493	15.7176	0	0	N/A
2636.55	79544.7	0.133405	0.0646	0.0431	16.025	15.173	15.7176	0	0	N/A
2636.55	79546	0.133405	0.085	0.0573	17.003	16.0586	15.7176	0	0	N/A
2636.57	79547.3	0.133406	0.0946	0.101	18.6	17.3286	15.7176	0	0	N/A
2636.57	79548.6	0.133405	0.0724	0.0468	17.856	16.773	15.6064	0	0	N/A
2636.59	79549.9	0.133405	0.0435	0.0204	16.604	15.7409	15.4764	0	0	N/A
2636.59	79551.2	0.133405	0.0268	0.0188	13.333	12.7571	15.3743	0	0	N/A
2636.61	79552.6	0.133405	0.0452	0.0178	12.847	12.309	15.2723	0	0	N/A
2636.61	79553.9	0.133405	0.0574	0.0336	14.042	13.4816	15.2018	0	0	N/A
2636.62	79555.2	0.133406	0.0455	0.0312	14.715	14.1215	15.2759	0	0	N/A
2636.64	79556.5	0.133405	0.0606	0.0272	16.543	15.9869	15.3403	0	0	N/A
2636.64	79557.8	0.133405	0.0796	0.0607	18.619	18.0008	15.3403	0	0	N/A
2636.66	79559.1	0.133405	0.063	0.0391	18.585	17.9906	15.3969	0	0	N/A
2636.66	79560.4	0.133405	0.0469	0.0274	18.097	17.4245	15.4764	0	0	N/A
2636.68	79561.7	0.133405	0.0469	0.029	17.767	17.031	15.6064	0	0	N/A
2636.68	79563	0.133406	0.0538	0.0259	16.498	15.8364	15.7007	0	0	N/A
2636.7	79564.3	0.133405	0.0468	0.023	16.037	15.4344	15.724	0	0	N/A
2636.7	79565.6	0.133405	0.055	0.0297	16.627	15.7927	15.755	0	0	N/A
2636.72	79566.9	0.133405	0.0619	0.0364	17.705	16.0352	15.7809	0	0	N/A
2636.72	79568.3	0.133405	0.0602	0.0374	18.322	17.4581	15.7809	0	0	N/A
2636.74	79569.6	0.133405	0.0612	0.0489	19.72	18.8646	15.7927	0	0	N/A
2636.74	79570.9	0.133406	0.0678	0.039	20.648	19.168	15.8146	0	0	N/A
2636.76	79572.2	0.133405	0.0713	0.0443	21.449	20.583	15.8364	0	0	N/A
2636.76	79573.5	0.133405	0.0637	0.0335	20.725	18.2592	15.9026	0	0	N/A
2636.78	79574.8	0.133405	0.0459	0.0303	19.772	18.9146	15.9689	0	0	N/A
2636.78	79576.1	0.133405	0.0584	0.0342	19.658	18.7169	15.9779	0	0	N/A
2636.8	79577.4	0.133405	0.0931	0.0629	20.333	19.079	15.9689	0	0	N/A
2636.8	79578.7	0.133406	0.0747	0.0419	19.844	18.3951	15.9026	0	0	N/A
2636.82	79580	0.133405	0.0625	0.0402	19.762	18.26	15.8364	0	0	N/A
2636.82	79581.3	0.133405	0.0595	0.0387	18.519	17.183	15.8146	0	0	N/A
2636.84	79582.6	0.133405	0.0429	0.0208	15.363	14.4617	15.7927	0	0	N/A
2636.84	79584	0.133405	0.0433	0.0238	13.833	13.1046	15.7809	0	0	N/A
2636.86	79585.3	0.133405	0.0514	0.0331	12.184	11.4862	15.769	0	0	N/A
2636.86	79586.6	0.133405	0.0378	0.0305	12.809	12.0922	15.755	0	0	N/A
2636.88	79587.9	0.133406	0.0353	0.0141	12.088	11.3828	15.7409	0	0	N/A
2636.89	79589.2	0.133405	0.0343	0.0171	11.797	11.7211	15.707	0	0	N/A
2636.89	79590.5	0.133405	0.0354	0.0199	14.355	13.2236	15.6944	0	0	N/A
2636.91	79591.8	0.133405	0.0588	0.0451	16.761	15.5184	15.6944	0	0	N/A
2636.91	79593.1	0.133405	0.0505	0.0325	15.25	14.0135	15.6944	0	0	N/A
2636.93	79594.4	0.133405	0.0431	0.0359	15.588	13.0912	15.6944	0	0	N/A
2636.93	79595.7	0.133406	0.0522	0.0326	14.532	13.4664	15.6944	0	0	N/A
2636.95	79597	0.133405	0.0591	0.036	14.194	13.2757	15.5184	0	0	N/A
2636.95	79598.3	0.133405	0.0578	0.0367	15.042	13.5417	15.5184	0	0	N/A
2636.97	79599.6	0.133405	0.034	0.0256	14.046	13.0566	15.5184	0	0	N/A
2636.97	79601	0.133405	0.0494	0.0305	14.98	14.2501	15.5184	0	0	N/A
2636.99	79602.3	0.133405	0.0578	0.0384	15.067	14.8537	15.5184	0	0	N/A
2636.99	79603.6	0.133406	0.0817	0.0537	16.448	15.6944	15.5184	0	0	N/A
2637.01	79604.9	0.133405	0.0563	0.0457	16.02	15.1415	15.5184	0	0	N/A
2637.01	79606.2	0.133405	0.0702	0.0488	15.901	14.9049	15.5184	0	0	N/A
2637.03	79607.5	0.133405	0.0559	0.0308	17.439	16.3179	15.4344	0	0	N/A
2637.03	79608.8	0.133405	0.0599	0.0273	16.419	15.2305	15.4344	0	0	N/A
2637.05	79610.1	0.133405	0.0618	0.0383	16.093	14.9237	15.3969	0	0	N/A
2637.05	79611.4	0.133406	0.0568	0.0365	15.361	14.2475	15.4344	0	0	N/A
2637.07	79612.7	0.133405	0.0636	0.0537	14.205	13.1371	15.3969	0	0	N/A
2637.07	79614	0.133405	0.049	0.0319	13.475	12.6194	15.3593	0	0	N/A
2637.09	79615.3	0.133405	0.0341	0.0175	13.777	13.0105	15.3403	0	0	N/A
2637.09	79616.7	0.133405	0.0379	0.0173	14.261	13.463	15.3213	0	0	N/A
2637.11	79618	0.133405	0.053	0.0221	15.483	14.6272	15.3403	0	0	N/A
2637.11	79619.3	0.133406	0.0762	0.0569	15.777	14.9548	15.3593	0	0	N/A
2637.12	79620.6	0.133405	0.0755	0.0461	16.061	15.3213	15.3593	0	0	N/A
2637.14	79621.9	0.133405	0.0633	0.0448	16.056	15.3593	15.3593	0	0	N/A
2637.14	79623.2	0.133405	0.061	0.036	15.021	14.2456	15.3213	0	0	N/A
2637.16	79624.5	0.133405	0.0617	0.0412	16.657	15.707	15.3213	0	0	N/A
2637.16	79625.8	0.133405	0.0406	0.0293	17.277	16.215	15.2305	0	0	N/A
2637.18	79627.1	0.133405	0.0347	0.0169	18.622	17.5457	15.2305	0	0	N/A
2637.18	79628.4	0.133406	0.0349	0.0223	19.192	18.1052	15.1638	0	0	N/A
2637.2	79629.7	0.133405	0.0486	0.0265	21.543	20.3948	15.1415	0	0	N/A
2637.2	79631	0.133405	0.0712	0.0412	20.254	19.204	15.0431	0	0	N/A
2637.22	79632.4	0.133405	0.066	0.039	19.16	18.1069	15.0266	0	0	N/A
2637.22	79633.7	0.133405	0.0392	0.0196	18.636	17.7556	14.9548	0	0	N/A
2637.24	79635	0.133405	0.0371	0.023	17.021	16.0964	14.9237	0	0	N/A
2637.24	79636.3	0.133406	0.0446	0.0256	17.535	16.4931	14.9237	0	0	N/A
2637.26	79637.6	0.133405	0.0555	0.0325	19.064	18.013	14.9237	0	0	N/A
2637.26	79638.9	0.133405	0.0645	0.0323	19.542	18.4766	14.9237	0	0	N/A
2637.28	79640.2	0.133405	0.0764	0.0561	18.327	17.2672	14.9237	0	0	N/A
2637.28	79641.5	0.133405	0.0388	0.0144	19.391	18.354	14.9237	0	0	N/A
2637.3	79642.8	0.133405	0.0382	0.022	11.913	10.7524	14.9237	0	0	N/A
2637.3	79644.1	0.133406	0.0366	0.0217	11.871	11.0838	14.9237	0	0	N/A
2637.32	79645.4	0.133405	0.0281	0.0205	11.598	10.8443	14.9237	0	0	N/A
2637.32	79646.7	0.133405	0.0312	0.0166	11.302	10.4072	14.9237	0	0	N/A
2637.34	79648.1	0.133405	0.0417	0.0238	11.249	10.1129	14.9237	0	0	N/A
2637.34	79649.4	0.133405	0.0569	0.0371	13.347	12.1816	14.9273	0	0	N/A
2637.36	79650.7	0.133405	0.0434	0.0303	14.477	13.2275	14.9548	0	0	N/A
2637.36	79652	0.133406	0.0346	0.0255	14.79	13.7476	15.0266	0	0	N/A
2637.38	79653.3	0.133405	0.0491	0.0317	14.684	13.8379	15.0431	0	0	N/A
2637.39	79654.6	0.133405	0.0372	0.0181	15.521	14.7723	15.105	0	0	N/A
2637.39	79655.9	0.133405	0.0395	0.0193	14.901	14.2093	15.1415	0	0	N/A
2637.41	79657.2	0.133405	0.043	0.0339	18.075	17.4017	15.1638	0	0	N/A
2637.41	79658.5	0.133405	0.0662	0.0637	18.026	17.3758	15.1638	0	0	N/A
2637.43	79659.8	0.133406	0.0816	0.0765	18.251	17.5843	15.2305	0	0	N/A
2637.43	79661.1	0.133405	0.0529	0.0316	17.669	16.8934	15.2305	0	0	N/A
2637.45	79662.4	0.133405	0.0548	0.0209	14.995	14.1945	15.2305	0	0	N/A
2637.45	79663.8	0.133405	0.0435	0.0206	15.383	14.0278	15.2305	0	0	N/A
2637.47	79665.1	0.133405	0.0355	0.0215	14.385	13.7997	15.2305	0	0	N/A
2637.47	79666.4	0.133405	0.0377	0.0227	15.797	15.0266	15.2305	0	0	N/A
2637.49	79667.7	0.133406	0.0622	0.0397	17.435	16.4593	15.2305	0	0	N/A
2637.49	79669	0.133405	0.0952	0.0549	19.028	18.0665	15.2305	0	0	N/A
2637.51	79670.3	0.133405	0.1162	0.0693	17.555	16.6575	15.2305	0	0	N/A
2637.51	79671.6	0.133405	0.097	0.0704	16.701	15.8969	15.2305	0	0	N/A
2637.53	79672.9	0.133405	0.0556	0.0422	15.009	14.3229	15.2305	0	0	N/A
2637.53	79674.2	0.133405	0.0476	0.0309	17.321	16.4666	15.2305	0	0	N/A
2637.55	79675.5	0.133405	0.0666	0.0466	18.789	17.8069	15.2305	7.7292	1.23694	N/A
2637.55	79676.8	0.133406	0.0606	0.0382	22.66	23.9218	15.2305	26.0739	4.17273	N/A
2637.57	79678.1	0.133405	0.0679	0.043	23.189	22.2638	15.2305	21.0999	3.37672	N/A
2637.57	79679.4	0.133405	0.098	0.0666	25.01	24.1841	15.2305	26.8608	4.29867	N/A
2637.59	79680.8	0.133405	0.0467	0.0336	26.125	25.3689	15.2305	30.4152	4.86749	N/A
2637.59	79682.1	0.133405	0.0308	0.0161	27.882	27.1019	15.2305	35.6142	5.69952	N/A
2637.61	79683.4	0.133405	0.0374	0.0204	27.689	26.9665	15.2305	35.208	5.63451	N/A
2637.61	79684.7	0.133406	0.0315	0.021	20.293	19.7104	15.2305	13.4397	2.15082	31.4374
2637.62	79686	0.133405	0.0332	0.0147	14.804	14.292	15.2305	0	0	N/A
2637.64	79687.3	0.133405	0.0336	0.0219	13.627	13.0443	15.2305	0	0	N/A
2637.64	79688.6	0.133405	0.0448	0.0228	14.478	13.7855	15.2305	0	0	N/A
2637.66	79689.9	0.133405	0.0651	0.0348	16.221	15.3343	15.2305	0	0	N/A
2637.66	79691.2	0.133405	0.1324	0.0919	16.378	15.1638	15.2305	0	0	N/A
2637.68	79692.5	0.133406	0.1092	0.0834	17.146	15.9126	15.2305	0	0	N/A
2637.68	79693.8	0.133405	0.0844	0.0452	16.296	15.0431	15.2305	0	0	N/A
2637.7	79695.1	0.133405	0.0541	0.0399	15.053	14.0419	15.2305	0	0	N/A
2637.7	79696.5	0.133405	0.0493	0.0288	14.283	13.5467	15.2305	0	0	N/A
2637.72	79697.8	0.133405	0.0396	0.0236	14.472	13.5047	15.2305	0	0	N/A
2637.72	79699.1	0.133405	0.0416	0.0229	15.535	14.6181	15.2305	0	0	N/A
2637.74	79700.4	0.133406	0.0627	0.0383	15.446	14.4971	15.2305	0	0	N/A
2637.74	79701.7	0.133405	0.061	0.0335	16.06	15.105	15.2305	0	0	N/A
2637.76	79703	0.133405	0.051	0.0319	18.859	17.8096	15.2305	0	0	N/A
2637.76	79704.3	0.133405	0.0603	0.0422	18.976	17.9844	15.2305	0	0	N/A
2637.78	79705.6	0.133405	0.0555	0.0359	18.132	17.0968	15.2305	0	0	N/A
2637.78	79706.9	0.133405	0.0532	0.0435	17.696	16.9032	15.2305	0	0	N/A
2637.8	79708.2	0.133406	0.0494	0.0368	16.507	15.6638	15.2305	0	0	N/A
2637.8	79709.5	0.133405	0.026	0.0166	15.722	14.9273	15.2305	0	0	N/A
2637.82	79710.8	0.133405	0.029	0.0154	16.167	15.3483	15.2305	0	0	N/A
2637.82	79712.2	0.133405	0.0351	0.0245	16.913	16.0319	15.2305	0	0	N/A
2637.84	79713.5	0.133405	0.0426	0.0285	20.398	19.5196	15.2305	0	0	N/A
2637.84	79714.8	0.133405	0.0455	0.0309	22.667	21.4977	15.2305	0	0	N/A
2637.86	79716.1	0.133406	0.0534	0.0295	22.469	21.429	15.2305	0	0	N/A
2637.86	79717.4	0.133405	0.0372	0.022	20.155	19.2698	15.2305	0	0	N/A
2637.88	79718.7	0.133405	0.0259	0.0094	17.064	16.276	15.2305	0	0	N/A
2637.89	79720	0.133405	0.0203	0.0108	16.794	16.1276	15.2305	0	0	N/A
2637.89	79721.3	0.133405	0.0289	0.018	18.266	17.668	15.2305	0	0	N/A
2637.91	79722.6	0.133405	0.0491	0.0292	18.514	17.9025	15.2305	0	0	N/A
2637.91	79723.9	0.133405	0.0503	0.036	19.114	18.4688	15.2305	0	0	N/A
2637.93	79725.2	0.133406	0.0377	0.0176	17.409	16.8561	15.2305	0	0	N/A
2637.93	79726.5	0.133405	0.0401	0.0224	14.476	13.9827	15.2305	0	0	N/A
2637.95	79727.9	0.133405	0.0488	0.0244	12.247	11.7728	15.2305	0	0	N/A
2637.95	79729.2	0.133405	0.0289	0.0188	11.53	11.1221	15.2305	0	0	N/A
2637.97	79730.5	0.133405	0.0382	0.0187	12.806	11.9926	15.2305	0	0	N/A
							0	0	0
							0	0	0
							0	0	0
							0	0	0
							0	0	0
							0	0	0
							0	0	0
							0	0	0
							0	0	0
							0	0	0
							0	0	0
							0	0	0
							0	0	0
							0	0	0
							0	0	0
							0	0	0
							0	0	0
							0	0	0
							0	0	0
							0	0	0
							0	0	0
							0	0	0
							0	0	0
							0	0	0
							0	0	0
							0	0	0
							0	0	0
							0	0	0
							0	0	0
							0	0	0
							0	0	0
							0	0	0
							0	0	0
							0	0	0
							0	0	0
							0	0	0
							0	0	0
							0	0	0
							0	0	0
							0	0	0
							0	0	0
							0	0	0
							0	0	0
							0	0	0
							0	0	0
							0	0	0
							0	0	0
							0	0	0
							0	0	0
							0	0	0
							0	0	0
							0	0	0
							0	0	0
							0	0	0
							0	0	0
							0	0	0
							0	0	0
							0	0	0
							0	0	0
							0	0	0
							0	0	0
							0	0	0
							0	0	0
							0	0	0
							0	0	0
							0	0	0
							0	0	0
							0	0	0	0
							0	0	0
							0	0	0
							0	0	0
							0	0	0
							0	0	0
							0	0	0
							0	0	0
							0	0	0
							0	0	0
							0	0	0
							0	0	0
							0	0	0
							0	0	0
							0	0	0
							0	0	0
							0	0	0
							0	0	0
							0	0	0
							0	0	0
							0	0	0
							0	0	0
							0	0	0
							0	0	0
							0	0	0
							0	0	0
							0	0	0
							0	0	0
							0	0	0
							0	0	0
							0	0	0
							0	0	0
							0	0	0
							0	0	0
							0	0	0
							0	0	0
							0	0	0
							0	0	0
							0	0	0
							0	0	0
							0	0	0
							0	0	0
							0	0	0
							0	0	0
							0	0	0
							0	0	0
							0	0	0
							0	0	0
							0	0	0
							0	0	0
							0	0	0
							0	0	0
							0	0	0
							0	0	0
							0	0	0
							0	0	0
							0	0	0
							0	0	0
							0	0	0
							0	0	0
							0	0	0
							0	0	0
							0	0	0
							0	0	0
							0	0	0
							0	0	0
							0	0	0
							0	0	0
							0	0	0
							0	0	0
							0	0	0
							0	0	0
							0	0	0
							0	0	0
							0	0	0
							0	0	0
							0	0	0
							0	0	0
							0	0	0
							0	0	0
							0	0	0
							0	0	0
							0	0	0
							0	0	0
							0	0	0
							0	0	0
							0	0	0
							0	0	0
							0	0	0
							0	0	0
							0	0	0
							0	0	0
							0	0	0
							0	0	0
							0	0	0
							0	0	0
							0	0	0	0
							0	0	0
							0	0	0
							0	0	0
							0	0	0
							0	0	0
							0	0	0
							0	0	0
							0	0	0
							0	0	0
							0	0	0
							0	0	0
							0	0	0
							0	0	0
							0	0	0
							0	0	0
							0	0	0
							0	0	0
							0	0	0
							0	0	0
							0	0	0
							0	0	0
							0	0	0	0
							0	0	0
							0	0	0
							0	0	0
							0	0	0
							0	0	0
							0	0	0
							0	0	0
							0	0	0
							0	0	0
							0	0	0
							0	0	0
							0	0	0	0
							0	0	0
							0	0	0
							0	0	0
							0	0	0
							0	0	0
							0	0	0
							0	0	0
							0	0	0
							0	0	0
							0	0	0
							0	0	0
							0	0	0
							0	0	0
							0	0	0
							0	0	0
							0	0	0
							0	0	0
							0	0	0
							0	0	0
							0	0	0
							0	0	0
							0	0	0
							0	0	0
							0	0	0
							0	0	0
							0	0	0
							0	0	0
							0	0	0
							0	0	0
							0	0	0
							0	0	0
							0	0	0
							0	0	0
							0	0	0
							0	0	0
							0	0	0
							0	0	0
							0	0	0
							0	0	0
							0	0	0
							0	0	0
							0	0	0
							0	0	0
							0	0	0
							0	0	0
							0	0	0
							0	0	0
							0	0	0
							0	0	0
							0	0	0
							0	0	0
							0	0	0
							0	0	0
							0	0	0
							0	0	0
							0	0	0
							0	0	0
							0	0	0
							0	0	0
							0	0	0
							0	0	0
							0	0	0
							0	0	0
							0	0	0
							0	0	0
							0	0	0
							0	0	0
							0	0	0
							0	0	0	0
							0	0	0
							0	0	0
							0	0	0
							0	0	0
							0	0	0
							0	0	0
							0	0	0
							0	0	0
							0	0	0
							0	0	0
							0	0	0
							0	0	0
							0	0	0
							0	0	0
							0	0	0
							0	0	0
							0	0	0
							0	0	0
							0	0	0
							0	0	0
							0	0	0
							0	0	0
							0	0	0
							0	0	0
							0	0	0
							0	0	0
							0	0	0
							0	0	0
							0	0	0
							0	0	0
							0	0	0
							0	0	0
							0	0	0
							0	0	0
							0	0	0
							0	0	0
							0	0	0
							0	0	0
							0	0	0
							0	0	0
							0	0	0
							0	0	0
							0	0	0	0
							0	0	0
							0	0	0
							0	0	0
							0	0	0
							0	0	0
							0	0	0
							0	0	0
							0	0	0
							0	0	0
							0	0	0
							0	0	0
							0	0	0
							0	0	0
							0	0	0
							0	0	0
							0	0	0
							0	0	0
							0	0	0
							0	0	0
							0	0	0
							0	0	0
							0	0	0
							0	0	0
							0	0	0
							0	0	0
							0	0	0
							0	0	0
							0	0	0	0
							0	0	0
							0	0	0
							0	0	0
							0	0	0
							0	0	0
							0	0	0
							0	0	0
							0	0	0
							0	0	0
							0	0	0
							0	0	0
							0	0	0
							0	0	0
							0	0	0
							0	0	0
							0	0	0	0
							0	0	0
							0	0	0
							0	0	0
							0	0	0
							0	0	0
							0	0	0
							0	0	0
							0	0	0
							0	0	0
							0	0	0
							0	0	0
							0	0	0	0
							0	0	0
							0	0	0
							0	0	0
							0	0	0
							0	0	0
							0	0	0
							0	0	0
							0	0	0
							0	0	0
							0	0	0
							0	0	0
							0	0	0
							0	0	0
							0	0	0
							0	0	0
							0	0	0	0
							0	0	0
							0	0	0
							0	0	0
							0	0	0
							0	0	0
							0	0	0
							0	0	0
							0	0	0	0
							0	0	0
							0	0	0
							0	0	0
							0	0	0
							0	0	0
							0	0	0
							0	0	0
							0	0	0
							0	0	0
							0	0	0
							0	0	0
							0	0	0
							0	0	0
							0	0	0
							0	0	0
							0	0	0
							0	0	0
							0	0	0
							0	0	0
							0	0	0
							0	0	0
							0	0	0
							0	0	0
							0	0	0
							0	0	0
							0	0	0
							0	0	0
							0	0	0
							0	0	0
							0	0	0
							0	0	0
							0	0	0
							0	0	0
							0	0	0
							0	0	0
							0	0	0
							0	0	0
							0	0	0
							0	0	0
							0	0	0
							0	0	0
							0	0	0
							0	0	0
							0	0	0
							0	0	0
							0	0	0
							0	0	0
							0	0	0
							0	0	0
							0	0	0
							0	0	0
							0	0	0
							0	0	0
							0	0	0	0
							0	0	0
							0	0	0
							0	0	0
							0	0	0
							0	0	0
							0	0	0
							0	0	0
							0	0	0
							0	0	0
							0	0	0
							0	0	0
							0	0	0
							0	0	0
							0	0	0
							0	0	0
							0	0	0
							0	0	0
							0	0	0
							0	0	0
							0	0	0
							0	0	0
							0	0	0
							0	0	0
							0	0	0
							0	0	0
							0	0	0
							0	0	0
							0	0	0
							0	0	0
							0	0	0
							0	0	0
							0	0	0
							0	0	0
							0	0	0
							0	0	0
							0	0	0
							0	0	0
							0	0	0
							0	0	0
							0	0	0
							0	0	0
							0	0	0
							0	0	0
							0	0	0
							0	0	0
							0	0	0
							0	0	0
							0	0	0
							0	0	0
							0	0	0
							0	0	0
							0	0	0
							0	0	0
							0	0	0
							0	0	0
							0	0	0
							0	0	0
							0	0	0
							0	0	0
							0	0	0
							0	0	0
							0	0	0
							0	0	0
							0	0	0
							0	0	0
							0	0	0
							0	0	0
							0	0	0
							0	0	0
							0	0	0
							0	0	0
							0	0	0
							0	0	0
							0	0	0
							0	0	0	0
							0	0	0
							0	0	0
							0	0	0
							0	0	0
							0	0	0
							0	0	0
							0	0	0
							0	0	0
							0	0	0
							0	0	0
							0	0	0
							0	0	0
							0	0	0
							0	0	0
							0	0	0
							0	0	0
							0	0	0
							0	0	0
							0	0	0
							0	0	0
							0	0	0
							0	0	0
							0	0	0
							0	0	0
							0	0	0
							0	0	0
							0	0	0
							0	0	0
							0	0	0
							0	0	0	0
							0	0	0
							0	0	0
							0	0	0
							0	0	0
							0	0	0
							0	0	0
							0	0	0
							0	0	0
							0	0	0
							0	0	0
							0	0	0
							0	0	0
							0	0	0
							0	0	0
							0	0	0
							0	0	0
							0	0	0
							0	0	0
							0	0	0
							0	0	0
							0	0	0
							0	0	0
							0	0	0
							0	0	0
							0	0	0
							0	0	0
							0	0	0
							0	0	0
							0	0	0
							0	0	0
							0	0	0
							0	0	0
							0	0	0
							0	0	0
							0	0	0
							0	0	0
							0	0	0
							0	0	0
							0	0	0
							0	0	0
							0	0	0
							0	0	0
							0	0	0
							0	0	0
							0	0	0
							0	0	0
							0	0	0
							0	0	0
							0	0	0
							0	0	0	0
							0	0	0
							0	0	0
							0	0	0
							0	0	0

## Sheet: 5 -- EDML_FIC
EDML Depth (m)	AICC2012 Age (yr BP) synched with EDC	AICC2012 Age (yr BP)	ACC (ie/yr)	EDML SO42- (ng/g)	Background SO42- [101-pt RRM] (ng/g)	Volcanic SO42- (ng/g)	Volcanic SO42- Deposition (kg/km2)	Cumulative Volcanic SO42- (kg/km2)
1942.39	78966.4	79199.3	0.05153	65.0664	82.0751	0	0	N/A
1942.41	78967.7	79200.6	0.05153	63.4601	82.0751	0	0	N/A
1942.43	78969.1	79202	0.05154	70.1515	82.0751	0	0	N/A
1942.44	78970.4	79203.3	0.05154	72.0156	82.0751	0	0	N/A
1942.46	78971.7	79204.6	0.05155	78.1041	82.0751	0	0	N/A
1942.48	78973.1	79206	0.05155	88.7993	82.0751	0	0	N/A
1942.5	78974.4	79207.3	0.05156	106.54	82.0751	0	0	N/A
1942.52	78975.8	79208.7	0.05156	108.685	82.0751	0	0	N/A
1942.54	78977.1	79210	0.05157	100.089	82.0751	0	0	N/A
1942.56	78978.5	79211.4	0.05157	90.1489	82.0751	0	0	N/A
1942.57	78979.8	79212.7	0.05158	90.7838	82.0751	0	0	N/A
1942.59	78981.1	79214	0.05158	92.2781	82.0751	0	0	N/A
1942.61	78982.5	79215.4	0.05159	94.4436	82.0751	0	0	N/A
1942.63	78983.8	79216.7	0.05159	91.0548	82.0751	0	0	N/A
1942.65	78985.2	79218.1	0.0516	83.5631	82.0751	0	0	N/A
1942.67	78986.5	79219.4	0.0516	82.8375	82.0751	0	0	N/A
1942.68	78987.8	79220.8	0.05161	103.899	82.0751	21.8238	1.38634	N/A
1942.7	78989.2	79222.1	0.05162	143.97	82.0751	61.8947	3.93258	N/A
1942.72	78990.5	79223.4	0.05162	232.394	82.0751	150.319	9.55074	N/A
1942.74	78991.9	79224.8	0.05163	310.647	82.0751	228.572	14.5256	N/A
1942.76	78993.2	79226.1	0.05163	360.457	82.0751	278.382	17.6909	N/A
1942.78	78994.6	79227.5	0.05164	324.855	82.0751	242.78	15.4314	N/A
1942.79	78995.9	79228.8	0.05164	289.962	82.0751	207.887	13.2136	N/A
1942.81	78997.2	79230.2	0.05165	224.776	82.0751	142.701	9.07199	N/A
1942.83	78998.6	79231.5	0.05165	180.564	82.0751	98.4893	6.26132	N/A
1942.85	78999.9	79232.8	0.05166	147.325	82.0751	65.2503	4.14903	N/A
1942.87	79001.6	79234.5	0.05166	131.52	82.0751	49.4452	3.82859	N/A
1942.89	79002.9	79235.8	0.05167	121.212	82.0751	39.1365	2.48903	N/A
1942.91	79004.2	79237.2	0.05167	114.58	82.0751	32.5049	2.06725	N/A
1942.93	79005.6	79238.5	0.05168	110.711	82.0751	28.636	1.82155	N/A
1942.94	79006.9	79239.8	0.05168	102.923	82.0751	20.8478	1.32614	N/A
1942.96	79008.3	79241.2	0.05169	97.3307	82.0751	15.2557	0.970608	107.717
1942.98	79009.6	79242.5	0.0517	86.2754	82.0751	0	0	N/A
1943.07	79015.8	79248.7	0.05172	82.2137	82.0751	0	0	N/A
1943.08	79017.1	79250	0.05172	96.1875	82.0751	0	0	N/A
1943.1	79018.4	79251.3	0.05173	101.045	82.0751	0	0	N/A
1943.12	79019.7	79252.6	0.05173	98.7764	82.0751	0	0	N/A
1943.14	79021	79253.9	0.05174	87.3276	82.0751	0	0	N/A
1943.15	79022.3	79255.2	0.05174	82.4357	82.0751	0	0	N/A
1943.17	79023.6	79256.5	0.05175	82.7018	82.0751	0	0	N/A
1943.19	79024.9	79257.8	0.05175	86.1262	82.0751	0	0	N/A
1943.21	79026.1	79259.1	0.05176	79.2946	82.0751	0	0	N/A
1943.23	79027.4	79260.4	0.05177	81.3079	82.0751	0	0	N/A
1943.24	79028.7	79261.7	0.05177	80.8554	82.0751	0	0	N/A
1943.26	79030	79263	0.05178	74.1224	82.0751	0	0	N/A
1943.28	79031.4	79264.3	0.05178	68.9724	82.0751	0	0	N/A
1943.3	79032.7	79265.6	0.05179	68.9496	82.0751	0	0	N/A
1943.32	79034	79266.9	0.05179	70.1753	82.0751	0	0	N/A
1943.33	79035.3	79268.2	0.0518	70.1664	82.0751	0	0	N/A
1943.35	79036.6	79269.5	0.0518	67.7491	82.0751	0	0	N/A
1943.37	79037.9	79270.8	0.05181	65.2241	82.0751	0	0	N/A
1943.39	79039.2	79272.1	0.05181	69.8963	82.3008	0	0	N/A
1943.4	79040.5	79273.4	0.05182	76.2576	82.5809	0	0	N/A
1943.42	79041.8	79274.7	0.05182	84.0142	82.8184	0	0	N/A
1943.44	79043.1	79276	0.05183	80.991	83.0681	0	0	N/A
1943.46	79044.4	79277.3	0.05183	78.8151	83.2146	0	0	N/A
1943.48	79045.7	79278.6	0.05184	77.3928	83.1519	0	0	N/A
1943.49	79047	79279.9	0.05184	76.4416	82.8637	0	0	N/A
1943.51	79048.3	79281.2	0.05185	78.9342	82.4894	0	0	N/A
1943.53	79049.6	79282.5	0.05186	79.7491	82.1712	0	0	N/A
1943.55	79050.9	79283.8	0.05186	83.6569	82.0437	0	0	N/A
1943.56	79052.2	79285.1	0.05187	101.063	81.9256	19.1378	1.17638	N/A
1943.58	79053.5	79286.4	0.05188	146.185	81.7838	64.4014	3.95942	N/A
1943.6	79054.8	79287.7	0.05188	225.18	81.608	143.572	8.82692	N/A
1943.62	79056	79288.9	0.05189	289.996	81.4749	208.521	12.8224	N/A
1943.64	79057.6	79290.5	0.0519	261.524	81.4451	180.079	13.569	N/A
1943.66	79058.9	79291.8	0.05191	221.875	81.4249	140.45	8.63996	N/A
1943.67	79060.2	79293.1	0.05191	173.788	81.4249	92.363	5.68179	N/A
1943.69	79061.5	79294.4	0.05192	133.882	81.4249	52.4567	3.22757	N/A
1943.71	79062.8	79295.7	0.05193	112.384	81.4249	30.9587	1.90519	N/A
1943.73	79064.1	79297	0.05194	93.9372	81.4249	12.5122	0.770152	60.5788
1943.75	79065.4	79298.3	0.05194	89.2072	81.4249	0	0	N/A
1943.76	79066.7	79299.6	0.05195	89.6033	81.4079	0	0	N/A
1943.78	79068	79300.9	0.05196	89.6267	81.4405	0	0	N/A
1943.8	79069.3	79302.2	0.05196	74.8858	81.5212	0	0	N/A
1943.82	79070.5	79303.5	0.05197	69.0231	81.592	0	0	N/A
1943.83	79071.8	79304.7	0.05198	66.7625	81.5973	0	0	N/A
1943.85	79073.1	79306	0.05198	77.6887	81.4852	0	0	N/A
1943.87	79074.4	79307.3	0.05199	80.0884	81.3623	0	0	N/A
1943.89	79075.7	79308.6	0.052	77.1562	81.2466	0	0	N/A
1943.91	79077	79309.9	0.05201	72.3507	81.174	0	0	N/A
1943.92	79078.3	79311.2	0.05201	71.7049	81.1035	0	0	N/A
1943.94	79079.6	79312.5	0.05202	72.0939	81.104	0	0	N/A
1943.96	79080.9	79313.8	0.05203	80.8228	81.2368	0	0	N/A
1943.98	79082.2	79315.1	0.05203	85.9592	81.5416	0	0	N/A
1944.05	79087.6	79320.5	0.05206	67.8497	81.108	0	0	N/A
1944.07	79089	79321.9	0.05207	74.7113	80.6774	0	0	N/A
1944.09	79090.3	79323.2	0.05208	73.46	80.2062	0	0	N/A
1944.11	79091.7	79324.6	0.05209	72.5475	79.9464	0	0	N/A
1944.13	79093	79325.9	0.05209	72.9321	79.6927	0	0	N/A
1944.14	79094.4	79327.3	0.0521	72.9789	79.4348	0	0	N/A
1944.16	79095.7	79328.6	0.05211	78.0594	79.1468	0	0	N/A
1944.18	79097.1	79330	0.05212	90.492	79.079	0	0	N/A
1944.2	79098.4	79331.3	0.05212	96.2653	79.0832	0	0	N/A
1944.22	79099.8	79332.7	0.05213	100.199	79.0695	0	0	N/A
1944.25	79101.7	79334.6	0.05214	98.116	79.0622	0	0	N/A
1944.26	79103.1	79336	0.05215	94.5426	79.0857	0	0	N/A
1944.28	79104.4	79337.3	0.05216	98.4094	79.0578	0	0	N/A
1944.3	79105.8	79338.7	0.05216	97.847	78.9654	0	0	N/A
1944.32	79107.1	79340	0.05217	91.2356	78.8616	0	0	N/A
1944.34	79108.5	79341.4	0.05218	84.9354	78.775	0	0	N/A
1944.36	79109.8	79342.7	0.05219	81.9997	78.7165	0	0	N/A
1944.38	79111.2	79344.1	0.05219	84.4614	78.6775	0	0	N/A
1944.39	79112.5	79345.4	0.0522	87.9652	78.596	0	0	N/A
1944.41	79113.9	79346.8	0.05221	90.7448	78.351	0	0	N/A
1944.43	79115.2	79348.1	0.05222	89.0903	78.1078	0	0	N/A
1944.45	79116.5	79349.5	0.05222	84.0976	77.9423	0	0	N/A
1944.47	79117.9	79350.8	0.05223	84.925	77.837	0	0	N/A
1944.49	79119.2	79352.2	0.05224	80.6116	77.6941	0	0	N/A
1944.51	79120.6	79353.5	0.05225	76.2268	77.5174	0	0	N/A
1944.52	79121.9	79354.9	0.05225	80.587	77.3499	0	0	N/A
1944.54	79123.3	79356.2	0.05226	86.9418	77.1499	9.79188	0.633019	N/A
1944.56	79124.6	79357.5	0.05227	112.439	76.9967	35.4419	2.29166	N/A
1944.58	79126	79358.9	0.05228	118.187	76.8501	41.3371	2.67336	N/A
1944.6	79127.3	79360.2	0.05228	112.948	76.697	36.2509	2.3444	N/A
1944.62	79129	79361.9	0.05229	101.251	76.6028	24.6483	1.93821	N/A
1944.64	79130.3	79363.2	0.0523	97.1692	76.5562	20.613	1.3336	N/A
1944.66	79131.7	79364.6	0.05231	100.521	76.5177	24.0028	1.5532	N/A
1944.68	79133	79365.9	0.05231	100.975	76.467	24.5078	1.58588	N/A
1944.69	79134.4	79367.3	0.05232	99.4229	76.369	23.0538	1.49207	N/A
1944.71	79135.7	79368.6	0.05233	92.7832	76.2777	16.5055	1.06846	N/A
1944.73	79137.1	79370	0.05234	82.6216	76.1891	6.4325	0.41648	17.3303
1944.75	79138.4	79371.3	0.05234	80.2309	75.974	0	0	N/A
1944.77	79139.8	79372.7	0.05235	83.7244	75.8008	0	0	N/A
1944.79	79141.1	79374	0.05236	87.2499	75.7028	0	0	N/A
1944.81	79142.5	79375.4	0.05237	86.6919	75.7448	0	0	N/A
1944.82	79143.8	79376.7	0.05237	81.9807	75.8406	0	0	N/A
1944.84	79145.2	79378.1	0.05238	73.1933	75.963	0	0	N/A
1944.86	79146.5	79379.4	0.05239	72.1437	76.0089	0	0	N/A
1944.88	79147.9	79380.8	0.0524	72.4568	76.1083	0	0	N/A
1944.9	79149.2	79382.1	0.0524	75.5805	76.3167	0	0	N/A
1944.92	79150.9	79383.8	0.05241	75.6013	76.5074	0	0	N/A
1944.94	79152.2	79385.1	0.05242	81.148	76.5699	0	0	N/A
1944.96	79153.6	79386.5	0.05243	96.9	76.5442	0	0	N/A
1944.98	79154.9	79387.8	0.05244	106.596	76.2938	0	0	N/A
1945.04	79159.5	79392.4	0.05241	61.499	76.2123	0	0	N/A
1945.06	79160.9	79393.8	0.0524	66.5994	76.3953	0	0	N/A
1945.07	79162.3	79395.2	0.05238	61.0795	76.569	0	0	N/A
1945.09	79163.8	79396.7	0.05237	66.5387	76.7468	0	0	N/A
1945.11	79165.2	79398.1	0.05235	62.1422	76.8443	0	0	N/A
1945.13	79166.6	79399.6	0.05233	62.0698	76.827	0	0	N/A
1945.15	79168.1	79401	0.05232	63.0891	76.7774	0	0	N/A
1945.17	79169.5	79402.4	0.0523	73.8703	76.6605	0	0	N/A
1945.19	79171	79403.9	0.05229	81.6442	76.3719	0	0	N/A
1945.21	79172.4	79405.3	0.05227	79.7549	75.9655	0	0	N/A
1945.22	79173.8	79406.7	0.05225	73.5374	75.5318	0	0	N/A
1945.24	79175.3	79408.2	0.05224	70.853	75.1684	0	0	N/A
1945.26	79176.7	79409.6	0.05222	66.7215	74.8837	0	0	N/A
1945.28	79178.1	79411	0.05221	62.7807	74.5587	0	0	N/A
1945.3	79179.6	79412.5	0.05219	61.861	74.2334	0	0	N/A
1945.32	79181	79413.9	0.05217	60.8238	73.882	0	0	N/A
1945.35	79183.7	79416.6	0.05214	60.5474	73.5963	0	0	N/A
1945.37	79185.1	79418	0.05213	66.7756	73.4557	0	0	N/A
1945.39	79186.5	79419.4	0.05211	69.7394	73.3262	0	0	N/A
1945.41	79188	79420.9	0.0521	64.4121	73.1883	0	0	N/A
1945.43	79189.4	79422.3	0.05208	61.5316	73.2037	0	0	N/A
1945.45	79190.8	79423.8	0.05207	65.58	73.3456	0	0	N/A
1945.47	79192.3	79425.2	0.05205	68.9651	73.4852	0	0	N/A
1945.48	79193.7	79426.6	0.05203	65.0079	73.4875	0	0	N/A
1945.5	79195.2	79428.1	0.05202	64.802	73.4771	0	0	N/A
1945.52	79196.6	79429.5	0.052	66.3491	73.5393	0	0	N/A
1945.54	79198	79430.9	0.05199	67.655	73.5259	0	0	N/A
1945.56	79199.5	79432.4	0.05197	64.7441	73.4979	0	0	N/A
1945.58	79200.9	79433.8	0.05195	64.9763	73.4587	0	0	N/A
1945.6	79202.3	79435.2	0.05194	64.1361	73.4091	0	0	N/A
1945.62	79203.8	79436.7	0.05192	68.7863	73.3515	0	0	N/A
1945.63	79205.2	79438.1	0.05191	72.6452	73.2457	0	0	N/A
1945.65	79206.6	79439.5	0.05189	73.2432	73.1617	0	0	N/A
1945.67	79208.1	79441	0.05187	72.1056	73.072	0	0	N/A
1945.69	79209.5	79442.4	0.05186	67.8474	73.0249	0	0	N/A
1945.71	79210.9	79443.9	0.05184	68.2391	73.0447	0	0	N/A
1945.73	79212.4	79445.3	0.05183	68.3074	73.1342	0	0	N/A
1945.75	79214	79447	0.05181	69.845	73.1799	0	0	N/A
1945.77	79215.5	79448.4	0.05179	74.0121	73.1217	0	0	N/A
1945.79	79216.9	79449.8	0.05178	80.8104	73.0121	0	0	N/A
1945.81	79218.4	79451.3	0.05176	78.6618	72.8726	0	0	N/A
1945.83	79219.8	79452.7	0.05174	77.6526	72.7215	0	0	N/A
1945.84	79221.2	79454.1	0.05173	77.7777	72.6897	0	0	N/A
1945.86	79222.7	79455.6	0.05171	81.8173	72.7664	0	0	N/A
1945.88	79224.1	79457	0.0517	89.0319	72.9388	0	0	N/A
1945.9	79225.5	79458.4	0.05168	95.9164	73.0878	0	0	N/A
1945.92	79227	79459.9	0.05166	89.5123	73.1726	0	0	N/A
1945.94	79228.4	79461.3	0.05165	77.3304	73.1483	0	0	N/A
1945.96	79229.8	79462.7	0.05163	69.7825	73.0675	0	0	N/A
1946.03	79235.8	79468.7	0.05157	58.2875	72.8243	0	0	N/A
1946.05	79237.3	79470.2	0.05155	78.6243	72.4762	0	0	N/A
1946.07	79238.7	79471.6	0.05153	84.315	72.5905	0	0	N/A
1946.09	79240.2	79473.1	0.05152	90.3491	72.6536	0	0	N/A
1946.11	79241.6	79474.5	0.0515	89.4539	72.7767	0	0	N/A
1946.13	79243.1	79476	0.05149	81.3287	72.8438	0	0	N/A
1946.15	79244.6	79477.5	0.05147	71.376	72.9601	0	0	N/A
1946.17	79246	79478.9	0.05145	68.5158	73.0949	0	0	N/A
1946.19	79247.5	79480.4	0.05144	67.5315	73.2298	0	0	N/A
1946.21	79248.9	79481.8	0.05142	64.5206	73.3333	0	0	N/A
1946.22	79250.4	79483.3	0.05141	59.6913	73.3027	0	0	N/A
1946.24	79251.9	79484.8	0.05139	61.1663	73.2543	0	0	N/A
1946.26	79253.3	79486.2	0.05137	65.4103	73.2512	0	0	N/A
1946.28	79254.8	79487.7	0.05136	68.9192	73.2778	0	0	N/A
1946.3	79256.2	79489.1	0.05134	69.1622	73.3515	0	0	N/A
1946.32	79257.7	79490.6	0.05132	68.5617	73.4716	0	0	N/A
1946.34	79259.2	79492.1	0.05131	59.6118	73.6051	0	0	N/A
1946.36	79260.6	79493.5	0.05129	59.2211	73.7537	0	0	N/A
1946.38	79262.1	79495	0.05128	69.3504	73.9091	0	0	N/A
1946.4	79263.5	79496.4	0.05126	72.8079	73.9314	0	0	N/A
1946.42	79265	79497.9	0.05124	75.5495	73.8744	0	0	N/A
1946.43	79266.5	79499.4	0.05123	92.13	73.8917	0	0	N/A
1946.45	79267.9	79500.8	0.05121	101.86	73.9623	0	0	N/A
1946.47	79269.4	79502.3	0.0512	96.669	73.9768	0	0	N/A
1946.49	79270.8	79503.7	0.05118	85.1307	73.9362	0	0	N/A
1946.51	79272.2	79505.1	0.05118	79.6698	74.0991	0	0	N/A
1946.53	79273.6	79506.5	0.05121	81.8296	74.3457	0	0	N/A
1946.55	79274.9	79507.8	0.05123	79.3843	74.4387	0	0	N/A
1946.57	79276.2	79509.1	0.05125	70.977	74.428	0	0	N/A
1946.59	79277.6	79510.5	0.05127	69.8865	74.4666	0	0	N/A
1946.61	79278.9	79511.8	0.0513	68.8446	74.5312	0	0	N/A
1946.62	79280.2	79513.1	0.05132	67.9982	74.6393	0	0	N/A
1946.64	79281.6	79514.5	0.05134	63.3004	74.7271	0	0	N/A
1946.66	79282.9	79515.8	0.05136	65.1838	74.812	0	0	N/A
1946.68	79284.2	79517.1	0.05139	64.4631	74.9315	0	0	N/A
1946.7	79285.6	79518.5	0.05141	68.451	75.1098	0	0	N/A
1946.72	79286.9	79519.8	0.05143	74.9846	75.5207	0	0	N/A
1946.74	79288.2	79521.1	0.05145	81.9993	75.9224	0	0	N/A
1946.76	79289.6	79522.5	0.05148	77.7461	76.1977	0	0	N/A
1946.78	79290.9	79523.8	0.0515	74.3523	76.3694	0	0	N/A
1946.8	79292.2	79525.1	0.05152	72.6506	76.5336	0	0	N/A
1946.82	79293.6	79526.5	0.05154	73.1617	76.7457	0	0	N/A
1946.83	79294.9	79527.8	0.05157	71.4353	76.985	0	0	N/A
1946.85	79296.2	79529.1	0.05159	78.7693	77.1143	0	0	N/A
1946.87	79297.5	79530.5	0.05161	80.9387	77.1513	0	0	N/A
1946.9	79299.2	79532.1	0.05164	89.5539	77.0849	0	0	N/A
1946.92	79300.6	79533.5	0.05166	87.5083	76.9108	0	0	N/A
1946.93	79301.9	79534.8	0.05168	84.1448	76.669	0	0	N/A
1946.95	79303.2	79536.1	0.05171	82.5656	76.4712	6.09432	0.385122	N/A
1946.97	79304.6	79537.5	0.05173	82.7845	76.3854	6.39912	0.40454	N/A
1947.01	79307.2	79540.1	0.05177	161.46	76.3894	85.0704	10.4559	N/A
1947.03	79308.4	79541.3	0.05179	175.546	76.5474	98.999	5.83295	N/A
1947.05	79309.6	79542.5	0.05181	160.604	76.4449	84.1595	4.96053	N/A
1947.06	79310.9	79543.8	0.05183	124.671	76.2775	48.3938	2.85353	N/A
1947.08	79312.1	79545	0.05186	100.03	76.1197	23.91	1.41068	N/A
1947.1	79313.4	79546.3	0.05188	91.9652	75.9793	15.9858	0.943511	N/A
1947.12	79314.6	79547.5	0.0519	81.291	75.6425	5.64851	0.333513	27.5802
1947.13	79315.8	79548.7	0.05192	74.4765	75.4849	0	0	N/A
1947.15	79317.1	79550	0.05194	75.4948	75.3275	0	0	N/A
1947.17	79318.3	79551.2	0.05196	83.3969	75.1966	0	0	N/A
1947.19	79319.6	79552.5	0.05198	78.8236	75.2456	0	0	N/A
1947.21	79320.8	79553.7	0.052	75.3026	75.4569	0	0	N/A
1947.22	79322	79554.9	0.05202	87.6375	75.6938	11.9437	0.706841	N/A
1947.24	79323.3	79556.2	0.05204	99.204	75.8222	23.3818	1.3843	N/A
1947.26	79324.5	79557.4	0.05206	108.441	75.8858	32.5553	1.92813	N/A
1947.28	79325.8	79558.7	0.05208	98.6937	75.9128	22.7809	1.34975	N/A
1947.29	79327	79559.9	0.05211	91.6987	75.8827	15.8159	0.93762	N/A
1947.31	79328.2	79561.1	0.05213	88.6305	75.9003	12.7301	0.754975	N/A
1947.33	79329.5	79562.4	0.05215	82.2779	75.9391	6.33883	0.376078	7.4377
1947.35	79330.7	79563.6	0.05217	68.674	75.9349	0	0	N/A
1947.36	79332	79564.9	0.05219	64.892	75.9534	0	0	N/A
1947.38	79333.2	79566.1	0.05221	65.8859	75.9967	0	0	N/A
1947.4	79334.4	79567.4	0.05223	67.5305	75.827	0	0	N/A
1947.42	79335.7	79568.6	0.05225	66.8159	75.5426	0	0	N/A
1947.44	79336.9	79569.8	0.05227	65.5131	75.2607	0	0	N/A
1947.46	79338.3	79571.2	0.0523	78.8501	75.0754	0	0	N/A
1947.47	79339.5	79572.5	0.05232	85.7703	75.0471	0	0	N/A
1947.49	79340.8	79573.7	0.05234	74.2498	75.0327	0	0	N/A
1947.51	79342	79574.9	0.05236	66.7476	75.086	0	0	N/A
1947.53	79343.3	79576.2	0.05238	68.0211	75.2621	0	0	N/A
1947.54	79344.5	79577.4	0.0524	70.4726	75.5344	0	0	N/A
1947.56	79345.8	79578.7	0.05242	73.3185	75.8501	0	0	N/A
1947.58	79347	79579.9	0.05244	76.2559	76.2573	0	0	N/A
1947.6	79348.2	79581.1	0.05246	79.8606	76.6028	0	0	N/A
1947.62	79349.5	79582.4	0.05248	83.4004	76.7964	0	0	N/A
1947.63	79350.7	79583.6	0.0525	87.2569	76.9431	0	0	N/A
1947.65	79352	79584.9	0.05253	102.775	76.9764	0	0	N/A
1947.67	79353.2	79586.1	0.05255	102.382	76.9391	0	0	N/A
1947.69	79354.4	79587.3	0.05257	91.7093	76.8142	0	0	N/A
1947.7	79355.7	79588.6	0.05259	84.4384	76.7624	0	0	N/A
1947.72	79356.9	79589.8	0.05261	87.9705	76.8398	0	0	N/A
1947.74	79358.2	79591.1	0.05263	98.8424	76.9234	0	0	N/A
1947.76	79359.4	79592.3	0.05265	99.0027	76.8815	0	0	N/A
1947.77	79360.6	79593.5	0.05267	88.6441	76.8298	0	0	N/A
1947.79	79361.9	79594.8	0.05269	80.917	76.6593	0	0	N/A
1947.81	79363.1	79596	0.05271	76.1787	76.4646	0	0	N/A
1947.83	79364.4	79597.3	0.05273	74.2333	76.2674	0	0	N/A
1947.85	79365.6	79598.5	0.05276	75.3645	76.1995	0	0	N/A
1947.86	79366.8	79599.7	0.05278	72.7001	76.1341	0	0	N/A
1947.88	79368.1	79601	0.0528	70.0324	76.1364	0	0	N/A
1947.9	79369.3	79602.2	0.05282	70.1203	76.0957	0	0	N/A
1947.92	79370.6	79603.5	0.05284	71.7247	76.0566	0	0	N/A
1947.93	79371.8	79604.7	0.05286	69.9107	75.9784	0	0	N/A
1947.95	79373	79606	0.05288	70.0838	75.8621	0	0	N/A
1947.97	79374.3	79607.2	0.0529	76.9335	75.7351	0	0	N/A
1947.99	79375.5	79608.4	0.05292	77.5253	75.61	0	0	N/A
1948.03	79378.6	79611.6	0.05292	52.6985	75.5197	0	0	N/A
1948.05	79380	79612.9	0.05291	57.9759	75.3832	0	0	N/A
1948.07	79381.3	79614.2	0.0529	55.139	75.2974	0	0	N/A
1948.09	79382.6	79615.5	0.05289	56.4065	75.3022	0	0	N/A
1948.1	79383.9	79616.8	0.05288	68.6866	75.2151	0	0	N/A
1948.12	79385.3	79618.2	0.05287	77.6487	75.1759	0	0	N/A
1948.14	79386.6	79619.5	0.05286	81.3061	75.1745	0	0	N/A
1948.16	79387.9	79620.8	0.05285	76.3218	75.1745	0	0	N/A
1948.18	79389.2	79622.1	0.05284	74.3256	75.1745	0	0	N/A
1948.2	79390.6	79623.5	0.05283	71.4561	75.1745	0	0	N/A
1948.22	79391.9	79624.8	0.05282	66.0075	75.3589	0	0	N/A
1948.23	79393.2	79626.1	0.05281	61.1074	75.7385	0	0	N/A
1948.25	79394.5	79627.4	0.0528	62.5137	75.9861	0	0	N/A
1948.27	79395.9	79628.8	0.05279	68.9972	76.114	0	0	N/A
1948.29	79397.2	79630.1	0.05278	74.3814	76.2072	0	0	N/A
1948.31	79398.5	79631.4	0.05277	79.2303	76.2908	0	0	N/A
1948.33	79399.8	79632.7	0.05276	77.705	76.3161	0	0	N/A
1948.34	79401.2	79634.1	0.05275	77.6803	76.4879	0	0	N/A
1948.36	79402.5	79635.4	0.05274	72.7126	76.7917	0	0	N/A
1948.38	79403.8	79636.7	0.05273	69.377	77.1543	0	0	N/A
1948.4	79405.1	79638	0.05272	77.2615	77.3067	0	0	N/A
1948.42	79406.5	79639.4	0.05271	80.6124	77.3052	0	0	N/A
1948.44	79407.8	79640.7	0.0527	83.9139	77.3705	0	0	N/A
1948.45	79409.1	79642	0.05269	85.9479	77.4417	0	0	N/A
1948.47	79410.4	79643.3	0.05268	93.0239	77.5479	0	0	N/A
1948.5	79412.1	79645	0.05267	95.6848	77.7031	0	0	N/A
1948.51	79413.4	79646.3	0.05266	102.611	77.8461	0	0	N/A
1948.53	79414.8	79647.7	0.05265	92.6639	77.9366	0	0	N/A
1948.55	79416.1	79649	0.05264	81.6437	77.986	0	0	N/A
1948.57	79417.4	79650.3	0.05263	76.9328	77.9337	0	0	N/A
1948.59	79418.7	79651.6	0.05262	71.2825	77.8401	0	0	N/A
1948.61	79420.1	79653	0.05261	71.8136	77.5968	0	0	N/A
1948.62	79421.4	79654.3	0.0526	71.3824	77.4627	0	0	N/A
1948.64	79422.7	79655.6	0.05259	73.3381	77.4532	0	0	N/A
1948.66	79424	79656.9	0.05258	80.9293	77.5039	0	0	N/A
1948.68	79425.4	79658.3	0.05257	79.7588	77.518	0	0	N/A
1948.7	79426.7	79659.6	0.05256	69.6049	77.2911	0	0	N/A
1948.72	79428	79660.9	0.05255	67.0414	77.0576	0	0	N/A
1948.74	79429.3	79662.2	0.05254	64.2748	76.9317	0	0	N/A
1948.75	79430.7	79663.6	0.05253	64.3909	76.8879	0	0	N/A
1948.78	79432.7	79665.6	0.05251	72.7871	76.8958	0	0	N/A
1948.8	79434	79666.9	0.0525	81.7363	76.9257	0	0	N/A
1948.82	79435.4	79668.3	0.05249	78.5883	76.9434	0	0	N/A
1948.85	79437.4	79670.3	0.05247	76.329	76.9922	0	0	N/A
1948.87	79438.7	79671.6	0.05246	72.5968	77.0731	0	0	N/A
1948.88	79440	79673	0.05245	72.6545	77.1549	0	0	N/A
1948.9	79441.4	79674.3	0.05244	69.0988	77.2196	0	0	N/A
1948.92	79442.7	79675.6	0.05243	65.5146	77.3077	0	0	N/A
1948.94	79444	79676.9	0.05242	64.2997	77.3957	0	0	N/A
1948.96	79445.3	79678.3	0.05241	64.2239	77.4015	0	0	N/A
1948.98	79446.7	79679.6	0.0524	67.2132	77.3999	0	0	N/A
1949.07	79453.8	79686.7	0.05235	62.6873	77.7126	0	0	N/A
1949.09	79455.1	79688	0.05234	66.4127	77.8116	0	0	N/A
1949.11	79456.4	79689.3	0.05233	75.9455	78.0389	0	0	N/A
1949.13	79457.7	79690.6	0.05232	99.9917	78.3033	21.6883	1.36501	N/A
1949.15	79459	79691.9	0.05231	117.903	78.3961	39.5071	2.48601	N/A
1949.17	79460.3	79693.2	0.0523	104.651	78.4542	26.1964	1.64812	N/A
1949.18	79461.6	79694.5	0.05229	103.758	78.5839	25.1744	1.58351	N/A
1949.2	79462.9	79695.8	0.05228	95.6051	78.6129	16.9922	1.06863	N/A
1949.22	79464.2	79697.2	0.05227	87.4206	78.6685	8.75207	0.55031	8.70159
1949.24	79465.6	79698.5	0.05226	92.1421	78.7634	0	0	N/A
1949.26	79466.9	79699.8	0.05225	110.656	78.9335	0	0	N/A
1949.27	79468.2	79701.1	0.05224	99.0189	79.1744	0	0	N/A
1949.29	79469.5	79702.4	0.05223	88.1282	79.4026	0	0	N/A
1949.31	79470.8	79703.7	0.05222	77.5336	79.5472	0	0	N/A
1949.33	79472.1	79705	0.05221	72.8297	79.6199	0	0	N/A
1949.35	79473.4	79706.3	0.0522	68.2902	79.6255	0	0	N/A
1949.37	79474.7	79707.6	0.05219	83.8523	79.6838	0	0	N/A
1949.38	79476.1	79709	0.05218	95.6783	79.6996	0	0	N/A
1949.4	79477.4	79710.3	0.05217	99.9572	80.0093	0	0	N/A
1949.42	79478.7	79711.6	0.05216	93.3288	80.3955	0	0	N/A
1949.44	79480	79712.9	0.05215	85.6296	80.576	0	0	N/A
1949.46	79481.3	79714.2	0.05214	80.4538	80.6319	0	0	N/A
1949.48	79482.6	79715.5	0.05213	73.512	80.7715	0	0	N/A
1949.49	79483.9	79716.8	0.05212	78.1131	80.9597	0	0	N/A
1949.51	79485.3	79718.2	0.05213	85.2164	80.9799	0	0	N/A
1949.53	79486.6	79719.5	0.05216	86.9013	80.9217	0	0	N/A
1949.55	79487.9	79720.8	0.05219	84.8485	80.7631	0	0	N/A
1949.57	79489.3	79722.2	0.05221	84.554	80.7235	0	0	N/A
1949.58	79490.6	79723.5	0.05224	78.4307	80.7105	0	0	N/A
1949.6	79491.9	79724.8	0.05227	78.3673	80.6662	0	0	N/A
1949.62	79493.3	79726.2	0.05229	79.6676	80.6175	0	0	N/A
1949.64	79494.6	79727.5	0.05232	89.6421	80.5815	0	0	N/A
1949.66	79496	79728.9	0.05234	90.8032	80.5488	0	0	N/A
1949.68	79497.3	79730.2	0.05237	89.2535	80.5263	0	0	N/A
1949.69	79498.6	79731.5	0.0524	89.3064	80.5252	0	0	N/A
1949.71	79500	79732.9	0.05242	115.639	80.6561	34.983	2.24884	N/A
1949.73	79501.3	79734.2	0.05245	182.53	80.8897	101.64	6.53759	N/A
1949.75	79502.6	79735.5	0.05248	196.547	81.1238	115.423	7.42835	N/A
1949.77	79504	79736.9	0.0525	198.576	81.368	117.209	7.54617	N/A
1949.79	79505.3	79738.2	0.05253	203.484	81.6176	121.866	7.8505	N/A
1949.8	79506.7	79739.6	0.05256	274.175	81.7494	192.426	12.4029	N/A
1949.82	79508	79740.9	0.05258	349.837	81.7496	268.087	17.2864	N/A
1949.84	79509.3	79742.2	0.05261	479.671	81.7798	397.891	25.6707	N/A
1949.86	79510.7	79743.6	0.05263	513.154	81.8015	431.352	27.8403	N/A
1949.88	79512	79744.9	0.05266	555.842	81.872	473.97	30.6081	N/A
1949.89	79513.3	79746.2	0.05269	434.35	82.0202	352.33	22.7659	N/A
1949.91	79514.7	79747.6	0.05271	332.747	82.2415	250.506	16.1927	N/A
1949.93	79516	79748.9	0.05274	227.594	82.5146	145.08	9.38321	N/A
1949.95	79517.3	79750.3	0.05277	176.213	82.7708	93.4421	6.04697	N/A
1949.97	79518.7	79751.6	0.05279	142.005	83.1095	58.8959	3.81278	N/A
1949.99	79520	79752.9	0.05282	119.019	83.3611	35.6583	2.30976	205.931
1950.03	79523.3	79756.2	0.05288	65.8024	83.6768	0	0	N/A
1950.05	79524.6	79757.5	0.05291	73.094	83.8684	0	0	N/A
1950.07	79525.9	79758.8	0.05294	77.2952	83.9158	0	0	N/A
1950.08	79527.3	79760.2	0.05296	76.0129	83.8676	0	0	N/A
1950.1	79528.6	79761.5	0.05299	82.2371	83.6733	0	0	N/A
1950.12	79529.9	79762.8	0.05301	91.5524	83.7216	0	0	N/A
1950.14	79531.2	79764.1	0.05304	97.4097	83.6768	13.7329	0.875474	N/A
1950.16	79532.5	79765.4	0.05306	97.7137	83.6192	14.0945	0.89886	N/A
1950.17	79533.8	79766.7	0.05309	112.699	83.5053	29.194	1.86288	N/A
1950.19	79535.1	79768	0.05312	133.805	83.3287	50.4762	3.22271	N/A
1950.21	79536.4	79769.3	0.05314	133.94	83.0436	50.8961	3.25077	N/A
1950.23	79537.7	79770.6	0.05317	132.272	82.9257	49.3463	3.15353	N/A
1950.24	79539.1	79772	0.05319	128.764	82.9704	45.7934	2.9276	N/A
1950.26	79540.4	79773.3	0.05322	107.237	83.0899	24.1475	1.54462	N/A
1950.28	79541.7	79774.6	0.05325	95	83.2356	11.7644	0.752946	18.4894
1950.3	79543	79775.9	0.05327	81.7874	83.4469	0	0	N/A
1950.32	79544.3	79777.2	0.0533	78.789	83.4012	0	0	N/A
1950.33	79545.6	79778.5	0.05332	94.3864	83.0379	0	0	N/A
1950.35	79546.9	79779.8	0.05335	96.4128	82.5958	0	0	N/A
1950.37	79548.2	79781.1	0.05337	89.8983	82.2713	0	0	N/A
1950.39	79549.5	79782.4	0.0534	84.5253	82.0773	0	0	N/A
1950.41	79550.8	79783.8	0.05343	93.6859	81.9841	0	0	N/A
1950.42	79552.2	79785.1	0.05345	99.1212	81.9999	0	0	N/A
1950.44	79553.5	79786.4	0.05348	94.4344	81.9949	0	0	N/A
1950.46	79554.8	79787.7	0.0535	91.6107	81.8931	0	0	N/A
1950.48	79556.1	79789	0.05353	91.5116	81.8757	0	0	N/A
1950.49	79557.4	79790.3	0.05355	89.8941	81.8699	0	0	N/A
1950.51	79558.7	79791.6	0.05358	80.732	81.7851	0	0	N/A
1950.53	79560	79792.9	0.05361	73.8344	81.8613	0	0	N/A
1950.55	79561.3	79794.2	0.05363	67.8703	81.9419	0	0	N/A
1950.57	79562.6	79795.5	0.05366	69.294	81.9609	0	0	N/A
1950.58	79564	79796.9	0.05368	69.0959	81.869	0	0	N/A
1950.6	79565.3	79798.2	0.05371	71.7613	81.8418	0	0	N/A
1950.62	79566.6	79799.5	0.05374	80.852	81.8298	0	0	N/A
1950.64	79567.9	79800.8	0.05376	88.9202	81.8388	0	0	N/A
1950.66	79569.2	79802.1	0.05379	85.9584	81.9311	0	0	N/A
1950.67	79570.5	79803.4	0.05381	83.4267	82.0138	0	0	N/A
1950.69	79571.8	79804.7	0.05384	99.686	81.9992	17.6868	1.14454	N/A
1950.71	79573.1	79806	0.05386	118.307	82.0854	36.2218	2.34485	N/A
1950.73	79574.4	79807.3	0.05389	98.8283	82.2854	16.5429	1.07151	N/A
1950.74	79575.8	79808.7	0.05392	89.8474	82.4648	7.38257	0.47845	5.03935
1950.76	79577.1	79810	0.05394	80.5765	82.558	0	0	N/A
1950.78	79578.4	79811.3	0.05397	77.7671	82.558	0	0	N/A
1950.8	79579.7	79812.6	0.05399	77.2482	82.558	0	0	N/A
1950.82	79581	79813.9	0.05402	82.4357	82.558	0	0	N/A
1950.83	79582.3	79815.2	0.05405	83.7009	82.558	0	0	N/A
1950.85	79583.6	79816.5	0.05407	83.5444	82.558	0	0	N/A
1950.87	79584.9	79817.8	0.0541	81.2058	82.558	0	0	N/A
1950.89	79586.2	79819.1	0.05412	86.5788	82.558	0	0	N/A
1950.91	79587.5	79820.5	0.05415	83.8204	82.558	0	0	N/A
1950.92	79588.9	79821.8	0.05417	83.5191	82.558	0	0	N/A
1950.94	79590.2	79823.1	0.0542	79.0597	82.7728	0	0	N/A
1950.96	79591.5	79824.4	0.05423	79.078	82.8985	0	0	N/A
1950.98	79592.8	79825.7	0.05425	80.681	82.9722	0	0	N/A
1951.02	79595.8	79828.7	0.05424	70.6545	83.112	0	0	N/A
1951.04	79597.1	79830	0.0542	87.0112	83.1103	0	0	N/A
1951.05	79598.4	79831.3	0.05416	80.5815	82.8922	0	0	N/A
1951.07	79599.6	79832.5	0.05412	79.5895	82.7564	0	0	N/A
1951.09	79600.9	79833.8	0.05408	75.4206	82.5043	0	0	N/A
1951.11	79602.1	79835	0.05404	79.4247	82.2719	0	0	N/A
1951.13	79603.4	79836.3	0.054	90.1254	82.0757	0	0	N/A
1951.14	79604.7	79837.6	0.05396	90.5342	81.9682	0	0	N/A
1951.16	79605.9	79838.8	0.05392	91.3476	81.9453	0	0	N/A
1951.18	79607.2	79840.1	0.05388	86.1335	82.0401	0	0	N/A
1951.2	79608.5	79841.4	0.05384	83.3243	82.1028	0	0	N/A
1951.22	79609.7	79842.6	0.0538	83.5011	82.1512	0	0	N/A
1951.23	79611	79843.9	0.05375	80.5662	82.0944	0	0	N/A
1951.25	79612.2	79845.2	0.05371	69.5169	81.9937	0	0	N/A
1951.27	79613.5	79846.4	0.05367	68.1284	81.7599	0	0	N/A
1951.29	79614.8	79847.7	0.05363	69.9653	81.5515	0	0	N/A
1951.31	79616	79848.9	0.05359	71.6594	81.4306	0	0	N/A
1951.32	79617.3	79850.2	0.05355	73.7421	81.4142	0	0	N/A
1951.34	79618.6	79851.5	0.05351	74.653	81.3052	0	0	N/A
1951.36	79619.8	79852.7	0.05347	77.7477	81.2164	0	0	N/A
1951.38	79621.1	79854	0.05343	77.8901	81.1696	0	0	N/A
1951.39	79622.4	79855.3	0.05339	85.6469	81.078	0	0	N/A
1951.41	79623.6	79856.5	0.05335	84.4308	80.8895	0	0	N/A
1951.43	79624.9	79857.8	0.05331	78.4468	80.7727	0	0	N/A
1951.45	79626.1	79859	0.05327	83.9227	80.7823	0	0	N/A
1951.47	79627.4	79860.3	0.05323	84.1657	80.873	0	0	N/A
1951.48	79628.7	79861.6	0.05319	81.0365	81.0929	0	0	N/A
1951.5	79629.9	79862.8	0.05315	83.026	81.3491	0	0	N/A
1951.52	79631.2	79864.1	0.0531	88.8433	81.5782	0	0	N/A
1951.55	79633.5	79866.4	0.05303	88.3916	81.7702	0	0	N/A
1951.57	79634.8	79867.7	0.05299	89.9542	81.783	0	0	N/A
1951.59	79636	79868.9	0.05295	88.574	81.734	0	0	N/A
1951.61	79637.3	79870.2	0.05291	88.0561	81.74	0	0	N/A
1951.62	79638.6	79871.5	0.05287	80.9196	81.7505	0	0	N/A
1951.64	79639.8	79872.7	0.05283	88.5507	81.6632	0	0	N/A
1951.66	79641.1	79874	0.05279	97.4821	81.5723	0	0	N/A
1951.68	79642.4	79875.3	0.05275	96.2795	81.4481	0	0	N/A
1951.7	79643.6	79876.5	0.0527	89.8268	81.3717	0	0	N/A
1951.71	79644.9	79877.8	0.05266	87.5677	81.4535	6.11427	0.372935	N/A
1951.73	79646.1	79879.1	0.05262	94.9169	81.5639	13.353	0.813836	N/A
1951.75	79647.4	79880.3	0.05258	98.9447	81.6216	17.3231	1.055	N/A
1951.77	79648.7	79881.6	0.05254	97.3923	81.6097	15.7826	0.960447	N/A
1951.79	79649.9	79882.8	0.0525	122.349	81.5215	40.8271	2.48265	N/A
1951.8	79651.2	79884.1	0.05246	154.304	81.4734	72.8307	4.42538	N/A
1951.82	79652.5	79885.4	0.05242	142.27	81.4175	60.8524	3.69472	N/A
1951.84	79653.7	79886.6	0.05238	134.987	81.2621	53.7249	3.25948	N/A
1951.86	79655	79887.9	0.05234	135.246	81.1331	54.1129	3.28049	N/A
1951.87	79656.3	79889.2	0.0523	124.378	81.045	43.3331	2.625	N/A
1951.89	79657.5	79890.4	0.05226	105.827	81.0546	24.7725	1.4995	N/A
1951.91	79658.8	79891.7	0.05222	99.311	81.0968	18.2142	1.10168	25.5711
1951.93	79660	79892.9	0.05218	86.6345	81.1347	0	0	N/A
1951.95	79661.3	79894.2	0.05214	82.1041	81.2325	0	0	N/A
1951.96	79662.6	79895.5	0.0521	74.977	81.1668	0	0	N/A
1951.98	79663.8	79896.7	0.05205	72.4365	81.1736	0	0	N/A
1952.03	79667.1	79900	0.05195	63.0923	81.192	0	0	N/A
1952.05	79668.5	79901.4	0.05191	64.1507	81.063	0	0	N/A
1952.07	79669.8	79902.7	0.05186	66.5707	81.0316	0	0	N/A
1952.09	79671.1	79904.1	0.05182	73.3697	80.9288	0	0	N/A
1952.1	79672.5	79905.4	0.05178	80.0877	80.7591	0	0	N/A
1952.12	79673.8	79906.7	0.05173	89.8181	80.6698	0	0	N/A
1952.14	79675.2	79908.1	0.05169	87.3025	80.6918	0	0	N/A
1952.16	79676.5	79909.4	0.05165	86.2219	80.7868	0	0	N/A
1952.18	79677.9	79910.8	0.0516	76.9587	80.8876	0	0	N/A
1952.2	79679.2	79912.1	0.05156	70.2258	81.1643	0	0	N/A
1952.22	79680.6	79913.5	0.05152	74.5156	81.448	0	0	N/A
1952.24	79681.9	79914.8	0.05147	78.7013	81.6906	0	0	N/A
1952.26	79683.2	79916.2	0.05143	79.6205	81.8634	0	0	N/A
1952.28	79684.6	79917.5	0.05139	83.1283	82.0867	0	0	N/A
1952.3	79685.9	79918.8	0.05134	84.4255	82.3033	0	0	N/A
1952.31	79687.3	79920.2	0.0513	91.5689	82.4914	0	0	N/A
1952.33	79688.6	79921.5	0.05126	90.4613	82.6016	0	0	N/A
1952.35	79690	79922.9	0.05121	83.822	82.6901	0	0	N/A
1952.37	79691.3	79924.2	0.05117	75.4909	82.638	0	0	N/A
1952.39	79692.7	79925.6	0.05113	79.9622	82.5994	0	0	N/A
1952.41	79694	79926.9	0.05108	81.5505	82.5616	0	0	N/A
1952.43	79695.4	79928.3	0.05104	81.5441	82.5317	0	0	N/A
1952.45	79696.7	79929.6	0.051	86.557	82.515	0	0	N/A
1952.47	79698	79930.9	0.05095	91.0719	82.5079	0	0	N/A
1952.49	79699.4	79932.3	0.05091	88.5706	82.4867	0	0	N/A
1952.5	79700.8	79933.7	0.05089	88.0822	82.4376	0	0	N/A
1952.52	79702.2	79935.1	0.05092	81.9427	82.4766	0	0	N/A
1952.54	79703.6	79936.5	0.05095	84.7496	82.4812	0	0	N/A
1952.56	79705.1	79938	0.05099	86.4763	82.371	0	0	N/A
1952.58	79706.5	79939.4	0.05102	84.3129	82.2304	0	0	N/A
1952.6	79708	79940.9	0.05105	74.2475	82.1785	0	0	N/A
1952.62	79709.4	79942.3	0.05108	73.7488	82.1593	0	0	N/A
1952.64	79710.8	79943.7	0.05112	70.6494	82.0112	0	0	N/A
1952.66	79712.3	79945.2	0.05115	74.6476	81.8701	0	0	N/A
1952.68	79713.7	79946.6	0.05118	87.8512	81.7436	0	0	N/A
1952.7	79715.2	79948.1	0.05121	87.5927	81.7428	0	0	N/A
1952.71	79716.6	79949.5	0.05125	82.3902	81.6603	0	0	N/A
1952.73	79718	79950.9	0.05128	81.3743	81.7048	0	0	N/A
1952.75	79719.5	79952.4	0.05131	75.8503	81.7403	0	0	N/A
1952.77	79720.9	79953.8	0.05134	79.2596	81.7766	0	0	N/A
1952.79	79722.4	79955.3	0.05138	76.2348	81.7543	0	0	N/A
1952.81	79723.8	79956.7	0.05141	72.7505	81.7734	0	0	N/A
1952.83	79725.2	79958.1	0.05144	72.3383	81.7078	0	0	N/A
1952.85	79726.7	79959.6	0.05148	75.6809	81.685	0	0	N/A
1952.87	79728.1	79961	0.05151	79.9057	81.7497	0	0	N/A
1952.89	79729.6	79962.5	0.05154	82.8377	81.972	0	0	N/A
1952.9	79731	79963.9	0.05157	84.0561	82.2287	0	0	N/A
1952.92	79732.4	79965.3	0.05161	79.3567	82.3846	0	0	N/A
1952.94	79733.9	79966.8	0.05164	97.0627	82.5554	14.5072	0.989243	N/A
1952.96	79735.3	79968.2	0.05167	120.19	82.7993	37.3908	2.55115	N/A
1952.98	79736.8	79969.7	0.0517	113.218	82.9532	30.2646	2.06613	5.60652
1953.03	79740.2	79973.1	0.05178	64.3305	83.1622	0	0	N/A
1953.04	79741.5	79974.4	0.05181	76.7249	83.2447	0	0	N/A
1953.06	79742.9	79975.8	0.05184	81.28	83.401	0	0	N/A
1953.08	79744.2	79977.1	0.05187	75.9449	83.5044	0	0	N/A
1953.1	79745.5	79978.4	0.0519	83.6639	83.54	0	0	N/A
1953.11	79746.9	79979.8	0.05193	88.0301	83.4739	0	0	N/A
1953.13	79748.2	79981.1	0.05196	91.4924	83.4332	0	0	N/A
1953.15	79749.5	79982.5	0.05199	92.166	83.4032	0	0	N/A
1953.17	79750.9	79983.8	0.05203	104.362	83.4733	0	0	N/A
1953.19	79752.2	79985.1	0.05206	93.9172	83.6188	0	0	N/A
1953.2	79753.6	79986.5	0.05209	88.992	83.72	0	0	N/A
1953.22	79754.9	79987.8	0.05212	84.8261	83.7764	0	0	N/A
1953.24	79756.2	79989.1	0.05215	90.8668	83.8996	0	0	N/A
1953.26	79757.6	79990.5	0.05218	92.3669	83.9505	0	0	N/A
1953.27	79758.9	79991.8	0.05221	90.8296	84.0229	0	0	N/A
1953.29	79760.2	79993.1	0.05224	87.226	83.9606	0	0	N/A
1953.31	79761.6	79994.5	0.05227	85.4972	83.8871	0	0	N/A
1953.33	79762.9	79995.8	0.0523	81.1666	83.9485	0	0	N/A
1953.34	79764.2	79997.1	0.05233	81.1118	84.2368	0	0	N/A
1953.36	79765.6	79998.5	0.05236	75.1962	84.4337	0	0	N/A
1953.38	79766.9	79999.8	0.05239	81.3552	84.5405	0	0	N/A
1953.4	79768.2	80001.1	0.05242	82.725	84.5227	0	0	N/A
1953.42	79769.6	80002.5	0.05245	80.4269	84.5178	0	0	N/A
1953.43	79770.9	80003.8	0.05248	81.206	84.4391	0	0	N/A
1953.45	79772.2	80005.2	0.05251	84.6218	84.3416	0	0	N/A
1953.47	79773.6	80006.5	0.05254	91.7448	84.2452	0	0	N/A
1953.49	79774.9	80007.8	0.05257	90.3487	84.2605	0	0	N/A
1953.5	79776.3	80009.2	0.0526	79.0935	84.2437	0	0	N/A
1953.52	79777.6	80010.5	0.05263	75.9634	84.2183	0	0	N/A
1953.54	79778.9	80011.8	0.05266	76.4556	84.2172	0	0	N/A
1953.56	79780.3	80013.2	0.05269	86.9056	84.3331	0	0	N/A
1953.57	79781.6	80014.5	0.05272	84.7446	84.4576	0	0	N/A
1953.59	79782.9	80015.8	0.05275	84.1425	84.622	0	0	N/A
1953.61	79784.3	80017.2	0.05278	78.9489	84.7235	0	0	N/A
1953.63	79785.6	80018.5	0.05281	81.6771	84.4887	0	0	N/A
1953.64	79786.9	80019.8	0.05284	74.48	84.2622	0	0	N/A
1953.66	79788.3	80021.2	0.05287	85.6181	84.1152	0	0	N/A
1953.68	79789.6	80022.5	0.0529	84.8979	84.0268	0	0	N/A
1953.7	79790.9	80023.8	0.05293	85.045	84.1537	0	0	N/A
1953.72	79792.3	80025.2	0.05296	79.723	84.2496	0	0	N/A
1953.73	79793.6	80026.5	0.053	83.5334	84.3959	0	0	N/A
1953.75	79794.9	80027.9	0.05303	75.6092	84.4898	0	0	N/A
1953.77	79796.3	80029.2	0.05306	79.5379	84.5713	0	0	N/A
1953.79	79797.6	80030.5	0.05309	87.9026	84.5715	0	0	N/A
1953.8	79799	80031.9	0.05312	103.308	84.5457	0	0	N/A
1953.82	79800.3	80033.2	0.05315	107.129	84.4392	0	0	N/A
1953.84	79801.6	80034.5	0.05318	101.915	84.3553	0	0	N/A
1953.86	79803	80035.9	0.05321	98.8435	84.3423	0	0	N/A
1953.87	79804.3	80037.2	0.05324	98.8753	84.3423	0	0	N/A
1953.89	79805.6	80038.5	0.05327	87.5155	84.3423	0	0	N/A
1953.91	79807	80039.9	0.0533	83.5791	84.3423	0	0	N/A
1953.93	79808.3	80041.2	0.05333	72.2334	84.5834	0	0	N/A
1953.95	79809.6	80042.5	0.05336	81.8906	84.6792	0	0	N/A
1953.96	79811	80043.9	0.05339	99.6206	84.7955	14.8251	0.969244	N/A
1953.98	79812.3	80045.2	0.05342	94.7272	84.9512	9.77595	0.63949	N/A
1954.02	79815.5	80048.4	0.05348	99.1531	84.9671	14.186	2.22754	N/A
1954.04	79816.8	80049.7	0.0535	125.983	84.9288	41.0545	2.65754	N/A
1954.06	79818.1	80051.1	0.05353	131.687	84.8457	46.8415	3.03382	N/A
1954.08	79819.5	80052.4	0.05355	119.819	84.783	35.0364	2.2701	N/A
1954.1	79821.1	80054.1	0.05358	109.149	84.8761	24.2729	2.00331	N/A
1954.12	79822.5	80055.4	0.0536	104.454	85.0917	19.3626	1.25572	N/A
1954.14	79823.8	80056.7	0.05362	97.8332	85.2896	12.5436	0.81379	15.8706
1954.16	79825.1	80058	0.05364	90.5905	85.4156	0	0	N/A
1954.18	79826.4	80059.3	0.05367	87.652	85.3371	0	0	N/A
1954.19	79827.7	80060.7	0.05369	90.8758	85.1368	0	0	N/A
1954.21	79829.1	80062	0.05371	86.0191	84.9691	0	0	N/A
1954.23	79830.4	80063.3	0.05373	83.919	84.9242	0	0	N/A
1954.25	79831.7	80064.6	0.05375	89.2863	84.8706	0	0	N/A
1954.27	79833	80065.9	0.05378	101.153	84.8995	0	0	N/A
1954.29	79834.3	80067.2	0.0538	97.4849	84.9912	0	0	N/A
1954.3	79835.7	80068.6	0.05382	91.0594	85.111	0	0	N/A
1954.32	79837	80069.9	0.05384	79.9525	85.002	0	0	N/A
1954.34	79838.3	80071.2	0.05386	86.1287	84.9689	0	0	N/A
1954.36	79839.6	80072.5	0.05389	84.0657	85.1264	0	0	N/A
1954.38	79840.9	80073.8	0.05391	79.8949	85.2589	0	0	N/A
1954.39	79842.3	80075.2	0.05393	79.5012	85.2303	0	0	N/A
1954.41	79843.6	80076.5	0.05395	83.3031	85.0781	0	0	N/A
1954.43	79844.9	80077.8	0.05397	83.2501	84.9781	0	0	N/A
1954.45	79846.2	80079.1	0.054	92.5994	85.0467	7.55275	0.49347	N/A
1954.47	79847.5	80080.4	0.05402	102.005	85.1348	16.87	1.10265	N/A
1954.49	79848.9	80081.8	0.05404	119.502	85.2125	34.289	2.24198	N/A
1954.5	79850.2	80083.1	0.05406	112.769	85.066	27.703	1.81205	N/A
1954.52	79851.5	80084.4	0.05409	105.182	84.9719	20.2103	1.32267	6.97282
1954.54	79852.8	80085.7	0.05411	83.1669	84.8928	0	0	N/A
1954.56	79854.1	80087	0.05413	68.1308	84.888	0	0	N/A
1954.58	79855.5	80088.4	0.05415	68.5679	84.8905	0	0	N/A
1954.6	79856.8	80089.7	0.05417	70.0426	84.9395	0	0	N/A
1954.61	79858.1	80091	0.0542	73.9483	85.0427	0	0	N/A
1954.63	79859.4	80092.3	0.05422	86.5083	85.3381	0	0	N/A
1954.65	79860.7	80093.6	0.05424	87.3186	85.5397	0	0	N/A
1954.67	79862.1	80095	0.05426	88.5197	85.7642	0	0	N/A
1954.69	79863.4	80096.3	0.05428	80.6377	85.9424	0	0	N/A
1954.71	79864.7	80097.6	0.05431	79.1872	86.282	0	0	N/A
1954.72	79866	80098.9	0.05433	75.6979	86.6015	0	0	N/A
1954.74	79867.3	80100.2	0.05435	77.7372	86.8102	0	0	N/A
1954.76	79868.6	80101.6	0.05437	73.894	86.8752	0	0	N/A
1954.78	79870	80102.9	0.05439	77.0078	86.8528	0	0	N/A
1954.8	79871.3	80104.2	0.05442	78.2618	86.7986	0	0	N/A
1954.82	79872.6	80105.5	0.05444	96.3313	86.7198	9.61147	0.633102	N/A
1954.83	79873.9	80106.8	0.05446	99.6499	86.6274	13.0225	0.858091	N/A
1954.85	79875.2	80108.2	0.05448	118.392	86.71	31.6822	2.08842	N/A
1954.87	79876.6	80109.5	0.05451	126.195	86.6977	39.4969	2.60498	N/A
1954.89	79877.9	80110.8	0.05453	111.04	86.8302	24.2098	1.59731	7.78191
1954.91	79879.2	80112.1	0.05455	90.8124	86.8152	0	0	N/A
1954.93	79880.5	80113.4	0.05457	88.716	86.7467	0	0	N/A
1954.94	79881.8	80114.7	0.05459	94.7875	86.6157	8.17175	0.539751	N/A
1954.96	79883.2	80116.1	0.05462	112.668	86.4838	26.1847	1.73047	N/A
1954.98	79884.5	80117.4	0.05464	127.556	86.298	41.2578	2.72759	4.99781
1955.01	79886.5	80119.4	0.05467	87.2077	86.1495	0	0	N/A
1955.03	79887.8	80120.7	0.05469	111.717	86.0304	0	0	N/A
1955.05	79889.2	80122.1	0.05472	110.955	85.9479	0	0	N/A
1955.06	79890.5	80123.4	0.05474	104.624	85.6819	0	0	N/A
1955.08	79891.8	80124.7	0.05476	94.7831	85.421	0	0	N/A
1955.1	79893.1	80126	0.05478	84.6599	85.0663	0	0	N/A
1955.12	79894.4	80127.3	0.0548	76.5452	84.7412	0	0	N/A
1955.14	79895.8	80128.7	0.05483	77.5818	84.4203	0	0	N/A
1955.16	79897.1	80130	0.05485	83.6755	84.1344	0	0	N/A
1955.17	79898.4	80131.3	0.05487	81.2636	83.8686	0	0	N/A
1955.19	79899.7	80132.6	0.05489	83.4537	83.5681	0	0	N/A
1955.21	79901	80133.9	0.05491	88.358	83.366	0	0	N/A
1955.23	79902.7	80135.6	0.05494	84.6549	83.2018	0	0	N/A
1955.25	79904	80136.9	0.05497	72.744	83.1094	0	0	N/A
1955.27	79905.3	80138.3	0.05499	80.1101	83.147	0	0	N/A
1955.29	79906.7	80139.6	0.05501	92.8751	83.111	0	0	N/A
1955.31	79908	80140.9	0.05503	91.6716	83.0994	0	0	N/A
1955.33	79909.3	80142.2	0.05505	82.3591	83.139	0	0	N/A
1955.34	79910.6	80143.5	0.05508	79.7204	83.1844	0	0	N/A
1955.36	79911.9	80144.8	0.0551	82.4538	83.1829	0	0	N/A
1955.38	79913.3	80146.2	0.05512	84.5086	83.1821	0	0	N/A
1955.4	79914.6	80147.5	0.05514	82.9249	83.1821	0	0	N/A
1955.42	79915.9	80148.8	0.05516	82.5945	83.1821	0	0	N/A
1955.44	79917.2	80150.1	0.05519	75.3319	83.1821	0	0	N/A
1955.45	79918.5	80151.4	0.05521	77.3099	83.1821	0	0	N/A
1955.47	79919.9	80152.8	0.05523	77.8967	83.1821	0	0	N/A
1955.51	79922.9	80155.8	0.05527	78.5695	83.1823	0	0	N/A
1955.53	79924.2	80157.1	0.05527	81.8707	83.3803	0	0	N/A
1955.55	79925.5	80158.4	0.05527	78.3514	83.5778	0	0	N/A
1955.57	79926.8	80159.7	0.05528	93.7693	83.7607	0	0	N/A
1955.59	79928.1	80161	0.05528	108.239	83.8951	0	0	N/A
1955.61	79929.3	80162.2	0.05528	100.971	83.8588	0	0	N/A
1955.62	79930.6	80163.5	0.05529	97.4553	83.8101	0	0	N/A
1955.64	79931.9	80164.8	0.05529	97.6145	83.7428	0	0	N/A
1955.66	79933.2	80166.1	0.05529	102.439	83.7878	0	0	N/A
1955.68	79934.5	80167.4	0.05529	104.777	83.8555	0	0	N/A
1955.7	79935.7	80168.6	0.0553	104.385	83.9772	0	0	N/A
1955.72	79937	80169.9	0.0553	108.443	84.0718	0	0	N/A
1955.73	79938.3	80171.2	0.0553	105.365	84.2284	0	0	N/A
1955.75	79939.6	80172.5	0.05531	97.6297	84.3412	0	0	N/A
1955.77	79940.9	80173.8	0.05531	92.6216	84.4377	0	0	N/A
1955.79	79942.1	80175	0.05531	91.5721	84.4377	0	0	N/A
1955.81	79943.4	80176.3	0.05532	94.042	84.4377	0	0	N/A
1955.83	79944.7	80177.6	0.05532	82.6085	84.4377	0	0	N/A
1955.84	79946	80178.9	0.05532	82.7008	84.4377	0	0	N/A
1955.86	79947.3	80180.2	0.05533	80.7064	84.4377	0	0	N/A
1955.88	79948.5	80181.4	0.05533	81.3297	84.3349	0	0	N/A
1955.9	79949.8	80182.7	0.05533	76.143	84.2631	0	0	N/A
1955.92	79951.1	80184	0.05533	75.7979	84.2631	0	0	N/A
1955.94	79952.4	80185.3	0.05534	71.0609	84.2631	0	0	N/A
1955.95	79953.7	80186.6	0.05534	73.8235	84.2631	0	0	N/A
1955.97	79954.9	80187.8	0.05534	76.0264	84.214	0	0	N/A
1955.99	79956.2	80189.1	0.05535	78.9379	83.7478	0	0	N/A
1956.03	79959	80191.9	0.05535	62.8002	83.2787	0	0	N/A
1956.05	79960.3	80193.2	0.05536	62.7299	82.9043	0	0	N/A
1956.07	79961.8	80194.7	0.05536	59.3771	82.6921	0	0	N/A
1956.09	79963	80195.9	0.05536	59.0356	82.6564	0	0	N/A
1956.11	79964.3	80197.2	0.05537	62.6358	82.7695	0	0	N/A
1956.12	79965.6	80198.5	0.05537	60.8668	82.8674	0	0	N/A
1956.14	79966.8	80199.7	0.05537	60.5256	82.8519	0	0	N/A
1956.16	79968.1	80201	0.05538	62.8441	82.883	0	0	N/A

## Sheet: 6 -- EDC_FIC
EDC Depth (m)	AICC2012 Age (yr BP)	ACC (ie/yr)	EDC SO42- (ng/g)	Background SO42- [85-pt RRM] (ng/g)	Volcanic SO42- (ng/g)	Volcanic SO42- Deposition (kg/km2)	Cumulative Volcanic SO42- (kg/km2)
1137.02	79199.6	0.01802	130.85	130.85	0	0	N/A
1137.04	79201.4	0.01803	133.66	131.1	0	0	N/A
1137.06	79203.2	0.01803	127.12	131.35	0	0	N/A
1137.08	79205	0.01804	121.47	131.1	0	0	N/A
1137.1	79206.8	0.01804	117.65	130.85	0	0	N/A
1137.12	79208.6	0.01805	106.3	130.475	0	0	N/A
1137.14	79210.4	0.01805	111.45	130.1	0	0	N/A
1137.16	79211.3	0.01806	134.58	129.98	0	0	N/A
1137.18	79213	0.01806	143.01	129.86	0	0	N/A
1137.2	79214.8	0.01807	122.71	129.36	0	0	N/A
1137.22	79216.6	0.01807	149.62	128.86	0	0	N/A
1137.24	79218.4	0.01808	140.09	129.36	0	0	N/A
1137.26	79220.2	0.01808	136.04	129.86	0	0	N/A
1137.28	79222	0.01809	130.1	129.36	0	0	N/A
1137.3	79223.8	0.01809	128.75	128.86	0	0	N/A
1137.31	79225.5	0.0181	131.35	128.805	0	0	N/A
1137.33	79227.3	0.0181	121.92	128.75	0	0	N/A
1137.37	79230	0.01811	128.74	128.745	0	0	N/A
1137.39	79231.8	0.01811	132.18	128.74	0	0	N/A
1137.41	79233.6	0.01812	143.28	128.745	0	0	N/A
1137.43	79235.4	0.01812	155.55	128.745	0	0	N/A
1137.45	79237.1	0.01813	151.36	128.745	0	0	N/A
1137.47	79238.9	0.01813	121.98	128.745	0	0	N/A
1137.49	79240.7	0.01814	114.22	128.745	0	0	N/A
1137.5	79242.5	0.01814	129.86	128.745	0	0	N/A
1137.52	79244.3	0.01815	122.6	128.745	0	0	N/A
1137.54	79246.1	0.01815	114.43	128.75	0	0	N/A
1137.56	79247.8	0.01816	128.86	128.805	0	0	N/A
1137.58	79249.6	0.01816	136.59	128.86	0	0	N/A
1137.6	79251.4	0.01817	136.7	129.36	0	0	N/A
1137.62	79253.2	0.01817	157.47	129.86	0	0	N/A
1137.64	79255	0.01818	134.37	129.98	0	0	N/A
1137.66	79256.8	0.01818	110.41	130.1	0	0	N/A
1137.68	79257.7	0.01818	122.58	130.4	0	0	N/A
1137.7	79259.4	0.01819	122.2	130.7	0	0	N/A
1137.72	79261.2	0.01819	111.16	130.4	0	0	N/A
1137.74	79263	0.0182	132.22	130.1	0	0	N/A
1137.76	79264.8	0.0182	131.83	129.98	0	0	N/A
1137.78	79266.6	0.01821	117.31	129.86	0	0	N/A
1137.8	79268.4	0.01821	143.17	129.36	0	0	N/A
1137.82	79270.1	0.01822	159.94	128.86	0	0	N/A
1137.83	79271.9	0.01822	177.8	129.36	0	0	N/A
1137.85	79273.7	0.01823	185.02	129.86	0	0	N/A
1137.87	79275.5	0.01823	200.52	129.86	0	0	N/A
1137.89	79277.3	0.01824	149.91	129.86	0	0	N/A
1137.91	79279.1	0.01824	121.24	130.1	0	0	N/A
1137.93	79280.8	0.01825	109.49	130.1	0	0	N/A
1137.97	79284.4	0.01826	116.01	130.1	0	0	N/A
1137.99	79286.2	0.01826	112.57	130.7	0	0	N/A
1138.01	79288	0.01827	89.55	131.35	0	0	N/A
1138.03	79288.9	0.01827	107.47	131.35	0	0	N/A
1138.05	79290.7	0.01827	116.79	131.35	0	0	N/A
1138.07	79292.4	0.01828	123.36	131.83	0	0	N/A
1138.09	79294.2	0.01828	130.7	131.83	0	0	N/A
1138.11	79296	0.01829	149.59	131.35	0	0	N/A
1138.12	79297.8	0.01829	111.53	131.35	0	0	N/A
1138.14	79299.6	0.0183	96.83	131.83	0	0	N/A
1138.16	79301.4	0.0183	94.95	131.83	0	0	N/A
1138.18	79303.1	0.01831	88.59	131.83	0	0	N/A
1138.2	79304	0.01831	97.08	131.83	0	0	N/A
1138.22	79305.8	0.01832	92.91	132.18	0	0	N/A
1138.24	79307.6	0.01832	134.55	131.83	0	0	N/A
1138.26	79309.4	0.01832	160.04	130.7	29.34	0.887212	N/A
1138.28	79311.2	0.01833	184.7	130.15	54.55	1.65044	N/A
1138.29	79312.9	0.01833	230.52	129.86	100.66	2.87632	N/A
1138.31	79314.7	0.01834	230.73	130.15	100.58	3.04476	N/A
1138.33	79316.5	0.01834	213.62	130.68	82.94	2.51076	N/A
1138.35	79318.3	0.01835	152.73	130.68	22.05	0.667862	11.6374
1138.37	79319.2	0.01835	134.35	130.68	0	0	N/A
1138.39	79321	0.01836	172.28	130.68	0	0	N/A
1138.41	79322.7	0.01836	162.93	130.7	0	0	N/A
1138.43	79324.5	0.01837	150.08	130.7	0	0	N/A
1138.44	79326.3	0.01837	197.33	130.68	0	0	N/A
1138.46	79328.1	0.01838	208.16	130.15	0	0	N/A
1138.48	79329.9	0.01838	217.72	127.66	0	0	N/A
1138.5	79331.6	0.01838	166.16	127.66	0	0	N/A
1138.52	79333.4	0.01838	132.69	127.66	0	0	N/A
1138.54	79334.3	0.01838	120.93	127.66	0	0	N/A
1138.56	79336	0.01837	117.36	128.78	0	0	N/A
1138.58	79337.8	0.01837	124.62	127.66	0	0	N/A
1138.6	79339.5	0.01837	124.08	124.62	0	0	N/A
1138.61	79341.2	0.01836	94.07	124.62	0	0	N/A
1138.63	79343	0.01836	98.26	124.08	0	0	N/A
1138.65	79344.7	0.01835	158.79	123.36	0	0	N/A
1138.67	79346.5	0.01835	182.4	123.36	0	0	N/A
1138.69	79348.2	0.01835	166.08	123.36	0	0	N/A
1138.71	79349.1	0.01834	151.49	123.36	0	0	N/A
1138.73	79350.8	0.01834	164.24	123.36	0	0	N/A
1138.75	79352.6	0.01834	117.57	124.08	0	0	N/A
1138.77	79354.3	0.01833	127.66	124.62	0	0	N/A
1138.78	79356.1	0.01833	182.47	127.66	0	0	N/A
1138.8	79357.8	0.01833	191.35	128.78	0	0	N/A
1138.82	79359.6	0.01832	179.93	128.78	0	0	N/A
1138.84	79361.3	0.01832	149.91	128.78	0	0	N/A
1138.86	79362.2	0.01831	132.79	128.78	0	0	N/A
1138.88	79363.9	0.01831	133.44	128.78	0	0	N/A
1138.9	79365.7	0.01831	121.08	128.41	0	0	N/A
1138.92	79367.4	0.0183	135.08	127.66	0	0	N/A
1138.94	79369.1	0.0183	140.76	127.66	0	0	N/A
1138.95	79370.9	0.0183	130.15	128.41	0	0	N/A
1138.97	79372.6	0.01829	76.6	128.78	0	0	N/A
1138.99	79374.4	0.01829	101.02	129.62	0	0	N/A
1139.01	79376.1	0.01829	136.79	130.15	0	0	N/A
1139.03	79377	0.01828	117.26	130.15	0	0	N/A
1139.07	79381.4	0.01827	95.68	129.62	0	0	N/A
1139.09	79383.1	0.01827	96.35	129.2	0	0	N/A
1139.11	79384.8	0.01827	110.23	129.62	0	0	N/A
1139.13	79386.6	0.01826	130.68	129.885	0	0	N/A
1139.15	79387.5	0.01826	131.17	129.62	0	0	N/A
1139.17	79389.2	0.01825	103.84	129.2	0	0	N/A
1139.19	79390.9	0.01825	92.27	128.78	0	0	N/A
1139.21	79392.7	0.01825	119.98	128.41	0	0	N/A
1139.23	79394.4	0.01824	141.15	128.41	0	0	N/A
1139.25	79396.2	0.01824	142.6	128.41	0	0	N/A
1139.27	79397.9	0.01824	119	128.41	0	0	N/A
1139.28	79399.7	0.01823	108.25	128.41	0	0	N/A
1139.3	79401.4	0.01823	121.63	128.41	0	0	N/A
1139.32	79403.1	0.01822	121.28	127.66	0	0	N/A
1139.34	79404.9	0.01822	114.07	127.66	0	0	N/A
1139.36	79406.6	0.01822	118	127.45	0	0	N/A
1139.38	79408.4	0.01821	128.78	127.66	0	0	N/A
1139.4	79410.1	0.01821	104.64	128.035	0	0	N/A
1139.42	79411.9	0.01821	110.87	128.595	0	0	N/A
1139.44	79412.7	0.0182	116.23	128.865	0	0	N/A
1139.46	79414.5	0.0182	123.16	129.285	0	0	N/A
1139.48	79416.2	0.01819	123.08	129.885	0	0	N/A
1139.5	79418	0.01819	176.98	129.655	0	0	N/A
1139.52	79419.7	0.01819	190.33	129.655	0	0	N/A
1139.54	79421.5	0.01818	152.71	129.655	0	0	N/A
1139.56	79423.2	0.01818	140.42	129.655	0	0	N/A
1139.58	79424.9	0.01818	130.45	129.285	0	0	N/A
1139.59	79426.7	0.01817	148.19	129.62	0	0	N/A
1139.61	79428.4	0.01817	171.84	129.655	0	0	N/A
1139.63	79430.2	0.01816	139.29	129.62	0	0	N/A
1139.65	79431.9	0.01816	128.41	129.285	0	0	N/A
1139.67	79433.7	0.01816	111.87	128.95	0	0	N/A
1139.69	79435.4	0.01815	116.43	128.865	0	0	N/A
1139.71	79437.1	0.01815	123.45	128.78	0	0	N/A
1139.73	79438.9	0.01815	124.67	128.595	0	0	N/A
1139.75	79439.8	0.01814	114.83	128.78	0	0	N/A
1139.77	79441.5	0.01814	127.24	128.595	0	0	N/A
1139.79	79443.3	0.01813	139.31	128.41	0	0	N/A
1139.81	79445	0.01813	133.37	128.1	0	0	N/A
1139.83	79446.8	0.01813	129.62	128.41	0	0	N/A
1139.85	79448.5	0.01812	134.45	128.78	0	0	N/A
1139.87	79450.2	0.01812	120.05	128.78	0	0	N/A
1139.88	79452	0.01812	101.7	128.95	0	0	N/A
1139.9	79453.7	0.01811	102.95	129.62	0	0	N/A
1139.92	79455.5	0.01811	164	129.69	0	0	N/A
1139.94	79457.2	0.0181	142.34	130.45	0	0	N/A
1139.96	79459	0.0181	126.88	130.45	0	0	N/A
1139.98	79460.7	0.0181	113.12	130.07	0	0	N/A
1140	79462.5	0.01809	96.3	130.45	0	0	N/A
1140.02	79464.2	0.01809	92.03	131.91	0	0	N/A
1140.04	79465.1	0.01809	133.45	133.37	0	0	N/A
1140.06	79466.8	0.01808	159.65	131.91	0	0	N/A
1140.08	79468.6	0.01808	166.91	131.91	0	0	N/A
1140.1	79470.3	0.01807	144.19	133.41	0	0	N/A
1140.12	79472	0.01807	128.95	133.95	0	0	N/A
1140.14	79473.8	0.01807	107.04	135.185	0	0	N/A
1140.17	79476.4	0.01807	148.5	135.185	0	0	N/A
1140.19	79478.2	0.01809	268.36	137.605	130.755	3.90426	N/A
1140.21	79480	0.0181	174.77	139.3	35.47	1.0597	N/A
1140.23	79481.8	0.01811	217.36	139.37	77.99	2.33131	7.29526
1140.25	79483.5	0.01812	139.43	139.925	0	0	N/A
1140.3	79488	0.01815	171.5	140.825	0	0	N/A
1140.32	79489.8	0.01817	135.92	140.825	0	0	N/A
1140.34	79491.5	0.01818	186.93	141.785	0	0	N/A
1140.36	79493.3	0.01819	129.69	141.785	0	0	N/A
1140.38	79495.1	0.0182	188.37	141.785	0	0	N/A
1140.4	79496.9	0.01821	143.01	141.785	0	0	N/A
1140.42	79498.6	0.01823	169.28	141.535	0	0	N/A
1140.44	79500.4	0.01824	127.79	142.09	0	0	N/A
1140.46	79502.2	0.01825	250.25	142.09	108.16	3.25815	N/A
1140.48	79504	0.01826	291.28	142.09	149.19	4.49658	N/A
1140.5	79505.8	0.01828	608.4	141.535	466.865	14.0867	N/A
1140.52	79507.5	0.01829	950.83	142.09	808.74	23.059	N/A
1140.54	79509.3	0.0183	2550.69	142.09	2408.6	72.7541	N/A
1140.56	79511.1	0.01831	2475.35	142.675	2332.67	70.4992	N/A
1140.58	79512.9	0.01832	2550.38	142.675	2407.7	72.8066	N/A
1140.6	79514.6	0.01834	1058.51	143.6	914.91	26.1575	N/A
1140.62	79516.4	0.01835	754.47	143.6	610.87	18.5023	N/A
1140.64	79518.2	0.01836	331.94	144.895	187.045	5.6684	N/A
1140.66	79520	0.01837	311.29	144.895	166.395	5.04535	N/A
1140.68	79521.8	0.01839	190.83	146.63	44.2	1.34167	N/A
1140.7	79523.5	0.0184	239.4	146.63	92.77	2.66099	320.337
1140.72	79525.3	0.01841	151.64	148.08	0	0	N/A
1140.74	79527.1	0.01842	238.25	150.07	0	0	N/A
1140.76	79528.9	0.01844	205.72	151.86	0	0	N/A
1140.78	79530.6	0.01845	210.05	151.86	0	0	N/A
1140.8	79532.4	0.01846	141.23	153	0	0	N/A
1140.82	79534.2	0.01847	211.03	151.86	0	0	N/A
1140.84	79536	0.01848	161.79	153	0	0	N/A
1140.86	79537.8	0.0185	214.23	153	61.23	1.86973	N/A
1140.88	79540.4	0.01851	184.5	154.355	30.145	1.33035	N/A
1140.9	79542.2	0.01852	269.3	154.355	114.945	3.51377	N/A
1140.92	79544	0.01853	229.57	154.355	75.215	2.3005	N/A
1140.94	79545.8	0.01855	280.75	154.355	126.395	3.87004	12.8844
1140.96	79547.5	0.01856	173.32	153	0	0	N/A
1140.98	79549.3	0.01857	265.64	151.86	0	0	N/A
1141	79551.1	0.01858	163.99	153	0	0	N/A
1141.02	79552.9	0.01859	158.19	154.355	0	0	N/A
1141.04	79554.6	0.01861	116.62	155.355	0	0	N/A
1141.06	79556.4	0.01862	211.82	155.355	0	0	N/A
1141.08	79558.2	0.01863	155.92	155.92	0	0	N/A
1141.1	79560	0.01864	217.89	155.355	0	0	N/A
1141.12	79561.8	0.01866	147.66	155.92	0	0	N/A
1141.14	79563.5	0.01867	168.68	155.92	0	0	N/A
1141.16	79565.3	0.01868	104.2	155.92	0	0	N/A
1141.18	79567.1	0.01869	145.6	155.92	0	0	N/A
1141.2	79568.9	0.0187	115.19	155.92	0	0	N/A
1141.22	79570.6	0.01872	152.08	156.56	0	0	N/A
1141.27	79574.2	0.01874	157	156.56	0	0	N/A
1141.29	79576	0.01876	141.84	156.56	0	0	N/A
1141.3	79577.8	0.01877	179.75	156.56	0	0	N/A
1141.32	79579.5	0.01878	124.49	156.56	0	0	N/A
1141.34	79581.3	0.01879	154.79	156.56	0	0	N/A
1141.36	79583.1	0.0188	122.85	156.56	0	0	N/A
1141.38	79584.9	0.01881	192.58	156.56	0	0	N/A
1141.4	79585.8	0.01883	126.15	156.56	0	0	N/A
1141.42	79587.5	0.01884	162.77	156.56	0	0	N/A
1141.44	79589.3	0.01885	121.02	156.56	0	0	N/A
1141.46	79591.1	0.01886	190.08	156.56	0	0	N/A
1141.48	79592.9	0.01887	114.86	156.56	0	0	N/A
1141.49	79594.6	0.01888	178.05	156.56	0	0	N/A
1141.51	79596.4	0.01889	119.83	156.24	0	0	N/A
1141.53	79598.2	0.01891	153.92	156.56	0	0	N/A
1141.55	79600	0.01892	134.7	156.24	0	0	N/A
1141.57	79601.7	0.01893	228.4	155.92	0	0	N/A
1141.59	79602.6	0.01894	180.38	156.56	0	0	N/A
1141.61	79604.4	0.01895	213.72	155.92	0	0	N/A
1141.63	79606.2	0.01896	142.21	155.92	0	0	N/A
1141.65	79607.9	0.01898	194.77	154.79	0	0	N/A
1141.67	79609.7	0.01899	138.44	155.92	0	0	N/A
1141.68	79611.5	0.019	193.25	154.79	0	0	N/A
1141.7	79613.3	0.01901	129.43	154.79	0	0	N/A
1141.72	79615	0.01902	177.39	154.355	0	0	N/A
1141.74	79616.8	0.01903	126.01	154.79	0	0	N/A
1141.76	79618.6	0.01905	145.63	154.355	0	0	N/A
1141.78	79619.5	0.01906	112.39	154.79	0	0	N/A
1141.8	79621.3	0.01907	150.03	154.355	0	0	N/A
1141.82	79623	0.01908	92.46	154.355	0	0	N/A
1141.84	79624.7	0.01909	163.15	153.74	0	0	N/A
1141.86	79626.4	0.01909	158.78	153.74	0	0	N/A
1141.87	79628.1	0.0191	191.62	152.82	0	0	N/A
1141.89	79629.8	0.01911	92.23	152.82	0	0	N/A
1141.91	79631.5	0.01912	193.27	151.99	0	0	N/A
1141.93	79633.1	0.01913	144.91	151.99	0	0	N/A
1141.95	79634.8	0.01914	196.64	150.965	0	0	N/A
1141.97	79635.7	0.01915	143.73	151.99	0	0	N/A
1141.99	79637.4	0.01916	192.19	150.965	0	0	N/A
1142.01	79639.1	0.01916	137.29	150.965	0	0	N/A
1142.03	79640.8	0.01917	179.82	150.965	0	0	N/A
1142.05	79642.4	0.01918	156.56	151.395	0	0	N/A
1142.06	79644.1	0.01919	215.77	150.46	0	0	N/A
1142.08	79645.8	0.0192	148.09	149.835	0	0	N/A
1142.1	79647.5	0.01921	204.03	149.835	0	0	N/A
1142.12	79649.2	0.01922	149.64	148.865	0	0	N/A
1142.14	79650.9	0.01922	185.71	148.865	36.845	1.10395	N/A
1142.16	79651.7	0.01923	168.93	147.745	21.185	0.29886	N/A
1142.18	79653.4	0.01924	294.32	147.745	146.575	4.39626	N/A
1142.2	79655.1	0.01925	242.99	147.745	95.245	2.85819	N/A
1142.22	79656.8	0.01926	327.08	147.745	179.335	5.38443	N/A
1142.24	79658.5	0.01927	228.05	147.745	80.305	2.41236	N/A
1142.25	79660.2	0.01928	304.48	148.865	155.615	4.6771	N/A
1142.27	79661.9	0.01928	195.08	148.09	46.99	1.41231	N/A
1142.29	79663.6	0.01929	215.63	148.865	66.765	2.0077	24.5512
1142.31	79665.2	0.0193	121.06	148.09	0	0	N/A
1142.33	79666.9	0.01931	165.55	148.09	0	0	N/A
1142.36	79669.5	0.01933	153.56	148.09	0	0	N/A
1142.38	79671.1	0.01933	139.75	148.09	0	0	N/A
1142.4	79672.8	0.01934	231.18	148.09	0	0	N/A
1142.42	79674.5	0.01935	126.4	147.4	0	0	N/A
1142.44	79676.2	0.01936	185.29	147.4	0	0	N/A
1142.46	79677.1	0.01937	138.22	148.09	0	0	N/A
1142.48	79678.7	0.01938	193.71	148.09	0	0	N/A
1142.5	79680.4	0.01939	147.4	148.09	0	0	N/A
1142.52	79682.1	0.0194	184.75	148.09	0	0	N/A
1142.53	79683.8	0.0194	110.89	148.09	0	0	N/A
1142.55	79685.5	0.01941	160.52	148.09	0	0	N/A
1142.57	79687.2	0.01942	145.86	148.09	0	0	N/A
1142.59	79688.9	0.01943	167.67	149.64	0	0	N/A
1142.61	79690.5	0.01944	134.72	149.64	0	0	N/A
1142.63	79691.4	0.01945	201.3	149.64	0	0	N/A
1142.65	79693.1	0.01946	124.69	149.64	0	0	N/A
1142.67	79694.8	0.01946	162.51	148.09	0	0	N/A
1142.69	79696.4	0.01947	111.59	147.4	0	0	N/A
1142.71	79698.1	0.01948	151.9	147.4	0	0	N/A
1142.72	79699.8	0.01949	108.51	147.4	0	0	N/A
1142.74	79701.5	0.0195	157.73	147.4	0	0	N/A
1142.76	79703.2	0.01951	131.39	147.4	0	0	N/A
1142.78	79704.9	0.01952	158.05	146.82	0	0	N/A
1142.8	79706.6	0.01953	99.66	147.4	0	0	N/A
1142.82	79707.4	0.01953	146.24	146.82	0	0	N/A
1142.84	79709.1	0.01954	111.67	147.4	0	0	N/A
1142.86	79710.8	0.01955	150.89	146.82	0	0	N/A
1142.88	79712.5	0.01956	78.58	146.82	0	0	N/A
1142.9	79714.1	0.01957	111.6	146.82	0	0	N/A
1142.91	79715.8	0.01958	82.87	146.05	0	0	N/A
1142.93	79717.5	0.01959	110.29	146.05	0	0	N/A
1142.95	79719.2	0.01959	92.65	146.05	0	0	N/A
1142.97	79720.9	0.0196	133.34	146.24	0	0	N/A
1142.99	79722.6	0.01961	103.75	146.05	0	0	N/A
1143.01	79723.4	0.01962	182.61	146.24	0	0	N/A
1143.03	79725.1	0.01963	137.47	146.05	0	0	N/A
1143.05	79726.8	0.01964	202.66	145.86	0	0	N/A
1143.07	79728.5	0.01965	155.31	145.535	0	0	N/A
1143.09	79730.1	0.01966	283.93	145.535	138.395	3.99202	N/A
1143.1	79731.8	0.01966	233.61	145.535	88.075	2.69932	N/A
1143.12	79733.5	0.01967	249.44	145.535	103.905	3.1861	9.87744
1143.14	79735.2	0.01968	137.37	145.86	0	0	N/A
1143.16	79736.9	0.01969	178.23	145.535	0	0	N/A
1143.18	79738.5	0.0197	132.98	145.535	0	0	N/A
1143.2	79739.4	0.01971	192.68	146.05	0	0	N/A
1143.22	79741.1	0.01972	145.21	145.535	0	0	N/A
1143.24	79742.8	0.01973	186.94	145.535	0	0	N/A
1143.26	79744.4	0.01973	159.59	145.535	0	0	N/A
1143.28	79746.1	0.01974	227.64	146.05	0	0	N/A
1143.3	79747.8	0.01975	128.04	145.535	0	0	N/A
1143.32	79749.5	0.01976	163.39	145.21	0	0	N/A
1143.33	79751.2	0.01977	137.93	144.085	0	0	N/A
1143.35	79752.9	0.01978	207.03	145.21	0	0	N/A
1143.37	79754.5	0.01979	130.48	144.085	0	0	N/A
1143.39	79756.2	0.01979	152.99	142.96	0	0	N/A
1143.41	79757.9	0.0198	122.63	142.96	0	0	N/A
1143.43	79758.7	0.01981	168.06	145.21	0	0	N/A
1143.48	79762.9	0.01982	127.91	142.96	0	0	N/A
1143.49	79764.5	0.01983	101.21	145.21	0	0	N/A
1143.51	79766.1	0.01983	93.69	142.96	0	0	N/A
1143.53	79767.8	0.01983	166.09	145.21	0	0	N/A
1143.55	79769.4	0.01984	136.24	142.96	0	0	N/A
1143.57	79771	0.01984	184.8	145.21	0	0	N/A
1143.59	79772.6	0.01984	142.96	145.21	0	0	N/A
1143.61	79774.3	0.01984	213.56	146.24	67.32	2.08211	N/A
1143.63	79775.9	0.01985	194.74	145.21	49.53	1.44251	N/A
1143.65	79777.5	0.01985	259.46	146.24	113.22	3.29741	N/A
1143.67	79779.1	0.01985	199.29	147.26	52.03	1.51532	N/A
1143.69	79779.9	0.01986	272.11	149.075	123.035	1.79253	10.1299
1143.71	79781.6	0.01986	169.78	147.26	0	0	N/A
1143.73	79783.2	0.01986	171.77	149.345	0	0	N/A
1143.75	79784.8	0.01986	128.66	151.79	0	0	N/A
1143.77	79786.4	0.01987	205.68	152.57	0	0	N/A
1143.79	79788.1	0.01987	165.18	152.57	0	0	N/A
1143.81	79789.7	0.01987	206.73	152.99	0	0	N/A
1143.83	79791.3	0.01988	134.25	154.15	0	0	N/A
1143.85	79792.9	0.01988	158.45	155.31	0	0	N/A
1143.87	79794.6	0.01988	97.35	154.15	0	0	N/A
1143.88	79796.2	0.01988	134.89	155.31	0	0	N/A
1143.9	79797.8	0.01989	91.31	155.31	0	0	N/A
1143.92	79799.4	0.01989	223.3	158.45	64.85	1.89249	N/A
1143.94	79801	0.01989	244.73	155.72	89.01	2.59754	N/A
1143.96	79802.7	0.0199	301.03	158.45	142.58	4.42313	N/A
1143.98	79804.3	0.0199	220.44	155.72	64.72	1.88965	N/A
1144	79805.9	0.0199	251.84	157.655	94.185	2.74995	13.5528
1144.02	79807.5	0.0199	163.44	154.925	0	0	N/A
1144.04	79809.2	0.01991	162.18	157.655	0	0	N/A
1144.06	79810.8	0.01991	109.28	154.925	0	0	N/A
1144.08	79811.6	0.01991	142.03	157.655	0	0	N/A
1144.1	79813.2	0.01992	165.14	154.925	0	0	N/A
1144.12	79814.8	0.01992	224.94	154.925	0	0	N/A
1144.14	79816.5	0.01992	132.89	154.925	0	0	N/A
1144.16	79818.1	0.01993	223.81	157.655	66.155	1.93446	N/A
1144.18	79819.7	0.01993	186.23	157.655	28.575	0.83557	N/A
1144.2	79821.3	0.01993	243.35	159.625	83.725	2.44823	N/A
1144.22	79822.9	0.01993	210.76	157.655	53.105	1.55286	N/A
1144.24	79824.6	0.01994	282.6	159.625	122.975	3.82261	10.5937
1144.26	79826.2	0.01994	170.86	159.625	0	0	N/A
1144.28	79827.8	0.01994	179.86	161.205	0	0	N/A
1144.29	79829.4	0.01995	138.4	159.625	0	0	N/A
1144.31	79831	0.01995	190.41	161.205	0	0	N/A
1144.33	79832.7	0.01995	141.1	161.205	0	0	N/A
1144.35	79834.3	0.01995	174.81	161.895	0	0	N/A
1144.37	79835.9	0.01996	120.63	161.205	0	0	N/A
1144.39	79837.5	0.01996	167.09	161.895	0	0	N/A
1144.41	79839.2	0.01996	152.15	161.895	0	0	N/A
1144.43	79840.8	0.01997	179.09	162.74	0	0	N/A
1144.45	79842.4	0.01997	110.29	162.18	0	0	N/A
1144.47	79844	0.01997	151.43	161.895	0	0	N/A
1144.49	79844.8	0.01997	147.26	161.61	0	0	N/A
1144.51	79846.5	0.01998	256.07	161.895	94.175	2.93325	N/A
1144.53	79848.1	0.01998	230.99	161.61	69.38	2.03385	N/A
1144.58	79852.1	0.01999	297.96	161.61	136.35	9.99763	14.9647
1144.59	79853.8	0.01999	160.8	160.8	0	0	N/A
1144.61	79855.4	0.01999	181.31	161.61	0	0	N/A
1144.63	79857	0.01999	118.88	160.8	0	0	N/A
1144.65	79858.6	0.02	191.18	160.8	30.38	0.891471	N/A
1144.67	79859.4	0.02	184.74	160.8	23.94	0.351248	N/A
1144.69	79861	0.02	281.16	161.61	119.55	3.50808	N/A
1144.71	79862.7	0.02001	260.47	161.61	98.86	3.0838	N/A
1144.73	79864.3	0.02001	288.72	161.61	127.11	3.73178	11.5664
1144.75	79865.9	0.02001	171.02	161.61	0	0	N/A
1144.76	79867.5	0.02001	192.73	161.61	0	0	N/A
1144.78	79869.1	0.02002	132.05	161.205	0	0	N/A
1144.8	79870.8	0.02002	174.53	160.8	0	0	N/A
1144.82	79872.4	0.02002	124.6	158.83	0	0	N/A
1144.84	79873.2	0.02002	156.86	156.86	0	0	N/A
1144.86	79874.8	0.02003	115.83	155.675	0	0	N/A
1144.88	79876.4	0.02003	181.92	154.49	0	0	N/A
1144.9	79878.1	0.02003	149.75	154.24	0	0	N/A
1144.91	79879.7	0.02004	208.17	154.49	0	0	N/A
1144.93	79881.3	0.02004	146.87	155.675	0	0	N/A
1144.95	79882.9	0.02004	199.82	154.49	0	0	N/A
1144.97	79884.5	0.02004	163.3	153.99	0	0	N/A
1144.99	79886.2	0.02005	233.7	153.99	0	0	N/A
1145.01	79887	0.02005	168.43	153.625	0	0	N/A
1145.03	79888.6	0.02005	236.69	153.99	0	0	N/A
1145.05	79890.2	0.02006	154.49	153.625	0	0	N/A
1145.07	79891.8	0.02006	185.33	153.99	0	0	N/A
1145.08	79893.5	0.02006	115.58	154.24	0	0	N/A
1145.1	79895.1	0.02006	161.61	154.24	0	0	N/A
1145.12	79896.7	0.02006	119.66	153.625	0	0	N/A
1145.14	79898.3	0.02005	228.94	153.625	0	0	N/A
1145.16	79899.1	0.02004	153.99	152.715	0	0	N/A
1145.18	79900.7	0.02004	165.27	153.625	0	0	N/A
1145.2	79902.3	0.02003	142.17	152.715	0	0	N/A
1145.22	79903.9	0.02002	242.33	153.625	0	0	N/A
1145.24	79905.5	0.02002	193.9	152.715	0	0	N/A
1145.25	79907.1	0.02001	224.42	152.715	0	0	N/A
1145.27	79908.7	0.02	143.65	151.8	0	0	N/A
1145.29	79910.3	0.02	146.52	152.715	0	0	N/A
1145.31	79911.9	0.01999	106.87	152.715	0	0	N/A
1145.33	79912.7	0.01999	182.94	153.625	0	0	N/A
1145.35	79914.3	0.01998	152.17	153.26	0	0	N/A
1145.37	79915.9	0.01997	163.66	153.625	0	0	N/A
1145.39	79917.5	0.01997	126.68	153.26	0	0	N/A
1145.4	79919.1	0.01996	177.8	153.26	0	0	N/A
1145.42	79920.7	0.01995	121.31	153.26	0	0	N/A
1145.44	79922.3	0.01995	164.23	153.99	0	0	N/A
1145.46	79923.9	0.01994	161.83	153.625	0	0	N/A
1145.48	79925.5	0.01993	224.85	153.99	0	0	N/A
1145.5	79926.3	0.01993	125.19	154.155	0	0	N/A
1145.52	79927.9	0.01992	137.97	154.32	0	0	N/A
1145.54	79929.6	0.01991	104.91	154.405	0	0	N/A
1145.56	79931.1	0.01991	147.02	154.405	0	0	N/A
1145.57	79932.8	0.0199	92.41	154.405	0	0	N/A
1145.59	79934.4	0.0199	133.27	155.675	0	0	N/A
1145.61	79936	0.01989	95.39	155.675	0	0	N/A
1145.63	79937.6	0.01988	112.74	157.955	0	0	N/A
1145.66	79940	0.01987	89.76	157.82	0	0	N/A
1145.68	79941.6	0.01987	187.42	160.33	27.09	0.789762	N/A
1145.7	79943.2	0.01986	203.9	160.33	43.57	1.26957	N/A
1145.72	79944	0.01985	292.91	161.72	131.19	1.91038	N/A
1145.74	79945.6	0.01985	193.72	160.33	33.39	0.972448	N/A
1145.76	79947.2	0.01984	211.23	161.72	49.51	1.4412	6.38336
1145.77	79948.8	0.01983	122.75	161.315	0	0	N/A
1145.79	79950.4	0.01983	153.26	161.315	0	0	N/A
1145.81	79952	0.01982	137.08	160.035	0	0	N/A
1145.83	79953.6	0.01982	183.89	159.615	0	0	N/A
1145.85	79954.4	0.01981	145.25	157.82	0	0	N/A
1145.87	79956	0.0198	230.89	157.82	0	0	N/A
1145.89	79957.6	0.0198	169.59	156.035	0	0	N/A
1145.9	79959.2	0.01979	169.47	156.035	0	0	N/A
1145.92	79960.8	0.01978	106.08	154.9	0	0	N/A
1145.94	79962.4	0.01978	142.47	156.035	0	0	N/A
1145.96	79963.2	0.01977	110.99	154.9	0	0	N/A
1145.98	79964.8	0.01977	159.05	154.9	0	0	N/A
1146	79966.4	0.01976	138.15	153.79	0	0	N/A
1146.01	79968	0.01975	173.62	154.9	0	0	N/A
1146.03	79969.6	0.01975	101.55	154.9	0	0	N/A
1146.05	79971.2	0.01974	106.99	154.9	0	0	N/A
1146.07	79972	0.01973	104.97	154.9	0	0	N/A
1146.09	79973.6	0.01973	169.28	156.035	0	0	N/A
1146.11	79975.2	0.01972	133.29	157.82	0	0	N/A
1146.12	79976.8	0.01972	170.44	159.615	0	0	N/A
1146.14	79978.4	0.01971	141.98	159.615	0	0	N/A
1146.16	79980	0.0197	191.45	160.6	0	0	N/A
1146.18	79980.9	0.0197	125.67	160.18	0	0	N/A
1146.2	79982.4	0.01969	195.99	160.6	0	0	N/A
1146.22	79984.9	0.01968	176.92	160.18	0	0	N/A
1146.24	79986.5	0.01968	210.87	160.6	0	0	N/A
1146.26	79987.3	0.01967	115.85	160.18	0	0	N/A
1146.28	79988.9	0.01966	198.58	159.615	0	0	N/A
1146.3	79990.5	0.01966	154.32	159.05	0	0	N/A
1146.31	79992.1	0.01965	193.25	159.615	0	0	N/A
1146.33	79993.7	0.01964	187.07	160.18	0	0	N/A
1146.35	79995.3	0.01964	269.47	160.6	0	0	N/A
1146.37	79996.1	0.01963	198.48	161.02	0	0	N/A
1146.39	79997.7	0.01963	229.15	161.02	0	0	N/A
1146.41	79999.3	0.01962	204.15	164.26	0	0	N/A
1146.42	80000.9	0.01961	232.17	164.66	0	0	N/A
1146.44	80002.5	0.01961	156.59	164.72	0	0	N/A
1146.46	80004.1	0.0196	210.17	164.72	0	0	N/A
1146.48	80004.9	0.01959	205.21	164.69	0	0	N/A
1146.5	80006.5	0.01959	214.11	164.66	0	0	N/A
1146.52	80008.1	0.01958	155.48	164.46	0	0	N/A
1146.53	80009.7	0.01958	178.54	164.26	0	0	N/A
1146.55	80011.3	0.01957	161.02	162.98	0	0	N/A
1146.57	80012.9	0.01956	211.19	162.98	0	0	N/A
1146.59	80013.7	0.01956	120.78	162.98	0	0	N/A
1146.61	80015.3	0.01955	160.18	162.98	0	0	N/A
1146.63	80016.9	0.01954	113.29	162.98	0	0	N/A
1146.65	80018.5	0.01954	146.01	162.98	0	0	N/A
1146.66	80020.2	0.01953	110.49	161.36	0	0	N/A
1146.68	80021.8	0.01953	117.3	160.6	0	0	N/A
1146.7	80023.4	0.01952	120.96	159.77	0	0	N/A
1146.72	80024.2	0.01951	216.69	159.77	0	0	N/A
1146.74	80025.8	0.01951	151.24	160.6	0	0	N/A
1146.77	80028.2	0.0195	108.73	161.36	0	0	N/A
1146.79	80029.8	0.0195	151.99	161.36	0	0	N/A
1146.81	80031.5	0.01949	182.28	161.36	0	0	N/A
1146.83	80033.1	0.01949	253.94	160.6	0	0	N/A
1146.85	80034.8	0.01949	199.29	160.6	0	0	N/A
1146.87	80036.4	0.01949	215.72	161.02	0	0	N/A
1146.88	80038.1	0.01948	164.72	161.36	0	0	N/A
1146.9	80039.7	0.01948	209.02	161.02	0	0	N/A
1146.92	80041.4	0.01948	179.03	161.36	0	0	N/A
1146.94	80043	0.01947	213.03	161.02	0	0	N/A
1146.96	80044.7	0.01947	164.26	161.02	0	0	N/A
1146.98	80046.3	0.01947	203.27	160.18	43.09	1.23093	N/A
1147	80048	0.01947	177.78	160.18	17.6	0.534191	N/A
1147.02	80049.6	0.01946	241.49	159.36	82.13	2.34495	N/A
1147.04	80051.3	0.01946	178.49	156.59	21.9	0.664363	N/A
1147.06	80052.9	0.01946	264.7	155.48	109.22	3.11842	N/A
1147.08	80054.5	0.01945	265.9	155.48	110.42	3.15106	N/A
1147.1	80055.4	0.01945	346.89	154.32	192.57	3.09115	N/A
1147.12	80057	0.01945	285.8	152.71	133.09	3.79799	N/A
1147.14	80058.7	0.01944	321.37	151.99	169.38	5.13306	N/A
1147.16	80060.3	0.01944	205.73	151.51	54.22	1.54648	N/A
1147.18	80062	0.01944	210.73	151.24	59.49	1.80285	26.4154
1147.2	80063.6	0.01944	159.36	150.48	0	0	N/A
1147.22	80065.3	0.01943	188.46	148.39	0	0	N/A
1147.24	80066.9	0.01943	164.66	146.01	0	0	N/A
1147.26	80068.6	0.01943	165.31	143.5	0	0	N/A
1147.28	80070.2	0.01942	114.26	141.07	0	0	N/A
1147.3	80071.9	0.01942	150.48	135.4	0	0	N/A
1147.32	80073.5	0.01942	115.56	132.36	0	0	N/A
1147.33	80075.1	0.01942	161.7	131.28	0	0	N/A
1147.35	80076.8	0.01941	118.93	131.28	0	0	N/A
1147.37	80078.5	0.01941	132.36	131.28	0	0	N/A
1147.39	80080.1	0.01941	114.31	131.28	0	0	N/A
1147.41	80081.8	0.0194	127.05	131.28	0	0	N/A
1147.43	80083.4	0.0194	124.45	132.36	0	0	N/A
1147.45	80085	0.0194	171.69	132.36	0	0	N/A
1147.47	80086.7	0.01939	120.04	135.4	0	0	N/A
1147.49	80088.3	0.01939	135.4	135.4	0	0	N/A
1147.51	80090	0.01939	113.9	135.4	0	0	N/A
1147.53	80091.6	0.01939	151.51	135.4	0	0	N/A
1147.55	80092.5	0.01938	148.39	135.4	0	0	N/A
1147.57	80094.1	0.01938	241.44	135.4	0	0	N/A
1147.59	80095.8	0.01938	164.41	132.36	0	0	N/A
1147.61	80097.4	0.01937	152.71	135.4	0	0	N/A
1147.63	80099.1	0.01937	110.35	132.36	0	0	N/A
1147.65	80100.7	0.01937	131.28	132.36	0	0	N/A
1147.67	80102.4	0.01937	107.36	131.28	0	0	N/A
1147.69	80104	0.01936	164.85	131.28	33.57	0.953556	N/A
1147.71	80105.7	0.01936	176.52	130.01	46.51	1.40369	N/A
1147.73	80107.3	0.01936	284.24	130.01	154.23	4.3809	N/A
1147.75	80109	0.01935	223.15	130.01	93.14	2.80954	N/A
1147.76	80110.6	0.01935	205.56	130.01	75.55	2.14489	11.6926
1147.78	80112.3	0.01935	125.94	130.01	0	0	N/A
1147.8	80113.9	0.01934	111.56	130.01	0	0	N/A
1147.82	80115.6	0.01934	90.66	130.01	0	0	N/A
1147.86	80118.9	0.01934	117.66	130.01	0	0	N/A
1147.88	80120.5	0.01933	112.94	130.01	0	0	N/A
1147.9	80122.2	0.01933	143.5	130.01	0	0	N/A
1147.92	80123.8	0.01933	111.85	130.01	0	0	N/A
1147.94	80125.5	0.01932	110.6	130.01	0	0	N/A
1147.96	80127.1	0.01932	99.58	130.645	0	0	N/A
1147.98	80128.8	0.01932	141.07	131.28	0	0	N/A
1148	80130.4	0.01932	100.81	130.645	0	0	N/A
1148.02	80132.1	0.01931	117.92	131.28	0	0	N/A
1148.04	80133.7	0.01931	116.22	131.28	0	0	N/A
1148.06	80135.4	0.01931	130.01	130.645	0	0	N/A
1148.08	80137	0.0193	101.58	130.01	0	0	N/A
1148.1	80138.7	0.0193	118.36	128.53	0	0	N/A
1148.12	80140.3	0.0193	93	127.05	0	0	N/A
1148.14	80142	0.01929	112.47	128.53	0	0	N/A
1148.16	80143.6	0.01929	104.83	127.05	0	0	N/A
1148.18	80145.3	0.01929	115.75	128.53	0	0	N/A
1148.2	80146.9	0.01929	137.54	127.05	0	0	N/A
1148.22	80148.6	0.01928	188.97	128.53	0	0	N/A
1148.24	80150.2	0.01928	146.65	127.05	0	0	N/A
1148.26	80151.9	0.01928	183.69	128.53	0	0	N/A
1148.28	80153.6	0.01927	150	130.01	0	0	N/A
1148.3	80155.2	0.01927	183.89	130.645	0	0	N/A
1148.32	80156	0.01927	139.31	130.01	0	0	N/A
1148.34	80157.7	0.01926	150.03	130.645	0	0	N/A
1148.36	80159.3	0.01926	105.07	130.01	0	0	N/A
1148.38	80161	0.01926	113.51	130.645	0	0	N/A
1148.4	80162.6	0.01926	114.93	130.01	0	0	N/A
1148.42	80164.3	0.01927	154.59	127.975	0	0	N/A
1148.44	80166	0.01928	124.17	125.94	0	0	N/A
1148.46	80167.7	0.01929	160.32	125.055	0	0	N/A
1148.48	80169.3	0.01931	120.75	124.17	0	0	N/A
1148.5	80171	0.01932	145.76	125.055	0	0	N/A
1148.52	80172.7	0.01933	119.7	124.17	0	0	N/A
1148.54	80174.4	0.01934	140.69	125.055	0	0	N/A
1148.56	80176	0.01936	123.09	125.055	0	0	N/A
1148.58	80177.7	0.01937	141.4	125.055	0	0	N/A
1148.6	80179.4	0.01938	146.63	125.055	0	0	N/A
1148.62	80181	0.0194	179.23	125.055	0	0	N/A
1148.64	80182.7	0.01941	145.68	125.055	0	0	N/A
1148.66	80184.4	0.01942	172.01	124.17	0	0	N/A
1148.68	80186.1	0.01943	148.79	127.09	21.7	0.657281	N/A
1148.7	80187.8	0.01945	219.69	130.01	89.68	2.71915	N/A
1148.72	80189.4	0.01946	200.72	133.775	66.945	1.91139	N/A
1148.74	80191.1	0.01947	251.23	137.54	113.69	3.45069	N/A
1148.76	80192.8	0.01948	183.58	133.775	49.805	1.51245	N/A
1148.78	80194.4	0.0195	179.27	137.54	41.73	1.19391	11.4449
1148.79	80196.1	0.01951	140.87	138.425	0	0	N/A
1148.81	80197.8	0.01952	144.26	139.31	0	0	N/A
1148.83	80199.5	0.01954	106.06	138.425	0	0	N/A
1148.85	80201.1	0.01955	140.76	139.31	0	0	N/A

## Sheet: 7a -- Atitlan_LCY
	Atitlan Los Chocoyos 80ka	Samalas 1257	Tambora 1815
	Cumulative Volcanic SO42- (kg/km2)	Cumulative Volcanic SO42- (kg/km2)	Cumulative Volcanic SO42- (kg/km2)
NGRIP (N=2)	402.818	87.5	40.3
NEEM	331.979	82.1	39
GISP2	310.504	145	36
Greenland (N=4)	348.434	104.857	38.4433
EDML	205.931	63.3109	48.4426
EDC	320.337	57.1557	39.5733
Antarctica (N=2)	263.134	60.2333	44.008
Antarctica (N=2), scaled to AVS2k	328.233	75.135	54.8955
Antarctica AVS2k (N=14)	N/A	73.4	45.8
	Atitlan Los Chocoyos 80ka	Samalas 1257	Tambora 1815
	VSSI (TgS)	VSSI (TgS)	VSSI (TgS)
	225.6 (±47.8, 1s)	59.4 (±10.9, 1s)	28.1 (±4.5, 1s)
LCY/SAM (x-fold)	3.79798
LCY/TAM (x-fold)	8.02847

## Sheet: 7b -- Atitlan_LCY
	Atitlan Los Chocoyos 80ka	Samalas 1257	Tambora 1815
	Cumulative Volcanic SO42- (kg/km2)	Cumulative Volcanic SO42- (kg/km2)	Cumulative Volcanic SO42- (kg/km2)
NGRIP	368.134	87.5	40.3
NEEM	331.979	82.1	39
GISP2	310.504	145	36
Greenland (N=3)	336.872	104.857	38.4433
EDML	205.931	63.3109	48.4426
EDC	320.337	57.1557	39.5733
Antarctica (N=2)	263.134	60.2333	44.008
Antarctica (N=2), scaled to AVS2k	328.233	75.135	54.8955
Antarctica AVS2k (N=14)	N/A	73.4	45.8
	Atitlan Los Chocoyos 80ka	Samalas 1257	Tambora 1815
	VSSI (TgS)	VSSI (TgS)	VSSI (TgS)
	221.7 (±47.2, 1s)	59.4 (±10.9, 1s)	28.1 (±4.5, 1s)
LCY/SAM (x-fold)	3.73232
LCY/TAM (x-fold)	7.88968
