# Supplementary material for: Los Chocoyos supereruption did not trigger millennial scale cooling
Source: Research Square preprint supplement (doi:10.21203/rs.3.rs-3310024/v1), 2024-01-25
Supplement: Supplementary file 2 [file cc870048e0491aef87c23f5b.xlsx]

## Sheet: Contents
Supplementary Data spreadsheet 2
Tab	Content
1)	Secondary standard measurements for each analytical session
2)	Tephra analysed from V19-30 Eastern Equatorial Pacific sediment core
3)	Tephra analysed from ice cores NEEM and EDC
4)	Proximal Los Chocoyos Ash samples measured for this study
5)	Beam Overlap Analysis using a 3 um beam on Old Crow and Sheep Track Tephra INTAV standards

## Sheet: 1.Secondary Glass Standards
DATA TABLE NAME	EPMA Secondary Standards
TECHNIQUE	EPMA
INSTRUMENT	Jeol JXA-iSP100 Electron Probe
LABORATORY	University of St Andrews Electron Microprobe Facility
			Recommended Values	Reference		SiO2	TiO2	Al2O3	FeO	MnO	MgO	CaO	Na2O	K2O	P2O5	Total
			ML3B-G	Jochum et al. (2006)	Value	51.4	2.13	13.6	10.9	0.17	6.59	10.5	2.4	0.385	0.23	98.305
					95% uncertainty	0.6	0.09	0.2	0.1	0.009	0.08	0.1	0.06	0.004	0.025	1.268
			StHS6/80-G	Jochum et al. (2006)	Value	63.7	0.703	17.8	4.37	0.076	1.97	5.28	4.44	1.29	0.164	99.793
					95% uncertainty	0.5	0.021	0.2	0.07	0.004	0.04	0.09	0.14	0.02	0.018	1.103
			Lipari Obsidian	Kuehn et al. (2011)	Value	74.1	0.074	13.1	1.55	0.065	0.041	0.73	4.07	5.11	0.01	98.85
					95% uncertainty	1.4	0.02	0.5	0.05	0.031	0.022	0.06	0.22	0.27	0.02	2.593
			Old Crow Tephra	Kuehn et al. (2011)	Value	72.1	0.297	12.5	1.62	0.052	0.275	1.43	3.66	3.56	0.036	95.53
					95% uncertainty	1.7	0.054	0.3	0.12	0.015	0.022	0.05	0.38	0.28	0.018
Standard ID	Analysis Date (DD/MM/YYYY)	Analytical Session (1-6)	Beam Conditions	Number of Analyses	Data Type	SiO2	TiO2	Al2O3	FeO	MnO	MgO	CaO	Na2O	K2O	P2O5	Total
ML3B-G	2021-12-02	2	5 um 5 nA	28	Mean	51.1539	2.09571	13.6843	10.8407	0.175796	6.48286	10.4071	2.41179	0.375325	0.233925	97.8615
					1 σ	0.214603	0.0382418	0.111403	0.125016	0.0312397	0.100106	0.0852385	0.118948	0.0172359	0.0400106	0.285474
ML3B-G	2021-12-20	3	5 um 5 nA	24	Mean	51.7892	2.08792	13.7117	10.8146	0.168183	6.49	10.3733	2.42917	0.369146	0.238992	98.4722
					1 σ	0.191673	0.0352604	0.106513	0.123569	0.0346464	0.107218	0.10692	0.120142	0.0179993	0.0365591	0.341463
ML3B-G	2022-02-28	4	3 um 1 nA	30	Mean	51.7773	2.089	13.641	10.8817	0.174903	6.636	10.4637	2.425	0.37622	0.20681	98.6717
					1 σ	0.311248	0.0822255	0.353654	0.277154	0.0746045	0.231794	0.148382	0.309535	0.0355263	0.108212	0.909563
ML3B-G	2022-03-01	5	3 um 1 nA	27	Mean	51.8648	2.11	13.6485	10.9811	0.16503	6.60852	10.4467	2.47852	0.377448	0.21633	98.897
					1 σ	0.303206	0.0923205	0.190762	0.282657	0.0951208	0.202289	0.153046	0.272237	0.0330242	0.112263	0.58925
ML3B-G	2022-11-08	6	3 um 1 nA	18	Mean	51.9044	2.16111	13.7483	11.0283	0.157683	6.45778	10.3383	2.37667	0.393022	0.233289	98.7991
					1 σ	0.318955	0.0606716	0.247321	0.246129	0.0909435	0.152607	0.120012	0.300431	0.0262741	0.145738	0.587797
StHs6/80-G	2021-11-04	1	10 um 5 nA	12	Mean	63.1292	0.697117	17.5458	4.26333	0.084575	1.9375	5.1575	4.7975	1.2725	0.163408	99.0484
					1 σ	0.192659	0.0292081	0.0987613	0.0967032	0.0228287	0.0513677	0.047506	0.115138	0.0319446	0.0458665	0.314075
StHs6/80-G	2021-12-02	2	5 um 5nA	27	Mean	62.6863	0.686826	17.7148	4.26111	0.0743481	1.94963	5.27519	4.61926	1.28037	0.1744	98.7223
					1 σ	0.276059	0.0187024	0.130247	0.0744381	0.0233462	0.056055	0.0687454	0.16079	0.0271012	0.0346761	0.39347
StHs6/80-G	2021-12-20	3	5 um 5 nA	24	Mean	63.3817	0.686875	17.7379	4.25875	0.0709208	1.96458	5.2775	4.66167	1.26397	0.160492	99.4644
					1 σ	0.174073	0.0160199	0.179492	0.084715	0.021544	0.045586	0.0618729	0.119006	0.0317652	0.0388485	0.286309
StHs6/80-G	2022-02-28	4	3 um 1 nA	27	Mean	63.4119	0.686404	17.7685	4.28	0.0821296	1.98852	5.31407	4.59741	1.2916	0.168693	99.5892
					1 σ	0.281207	0.0494175	0.278495	0.23902	0.0585655	0.120948	0.131098	0.501226	0.0757852	0.112925	0.762014
StHs6/80-G	2022-03-01	5	3 um 1 nA	27	Mean	63.3578	0.696536	17.7336	4.35879	0.0797697	1.95273	5.30394	4.68515	1.31996	0.194806	99.5344
					1 σ	0.291102	0.0445092	0.325469	0.179579	0.0662426	0.115604	0.0925317	0.378493	0.0676503	0.118956	1.23227
StHs6/80-G	2022-11-08	6	3 um 1 nA	22	Mean	63.4659	0.724691	17.9686	4.37455	0.111655	1.95409	5.26773	4.69091	1.32318	0.227495	100.109
					1 σ	0.327787	0.0570591	0.263119	0.151429	0.0734558	0.0730726	0.124439	0.361214	0.0674986	0.116404	0.665446
Lipari Obsidian	2021-11-04	1	10 um 5 nA	8	Mean	74.5738	0.072825	13.025	1.45875	0.06955	0.043325	0.709675	4.1675	5.045	0.0188375	99.1842
					1 σ	0.203255	0.0124546	0.16362	0.0697828	0.0255132	0.0153481	0.0325348	0.216844	0.0609449	0.0129828	0.395003
Lipari Obsidian	2021-12-02	2	5 um 5nA	27	Mean	73.6808	0.071137	13.1007	1.51185	0.0683407	0.0383926	0.730719	4.00407	5.07704	0.00965185	98.1324
					1 σ	0.271654	0.019838	0.117471	0.0669119	0.0244465	0.019745	0.0303479	0.108495	0.0646181	0.0137418	0.317681
Lipari Obsidian	2021-12-20	3	5 um 5 nA	10	Mean	74.635	0.06975	13.184	1.531	0.06646	0.03072	0.73385	3.996	5.008	0.0129	99.2677
					1 σ	0.275489	0.0182639	0.130826	0.0782375	0.0246955	0.0161124	0.0145005	0.093832	0.0539135	0.0147991	0.303328
Lipari Obsidian	2022-02-28	4	3 um 1 nA	30	Mean	74.2587	0.06985	13.0533	1.47965	0.0804767	0.0276767	0.73597	4.01867	5.10333	0.0410267	98.8687
					1 σ	0.387216	0.0346651	0.281992	0.169231	0.0729996	0.0298157	0.046117	0.358202	0.124411	0.0606402	0.627831
Lipari Obsidian	2022-03-01	5	3 um 1 nA	27	Mean	74.4674	0.0541815	13.0307	1.54889	0.0648667	0.0305407	0.739541	4.07444	5.1637	0.0300889	99.2045
					1 σ	0.339089	0.044082	0.235861	0.0876327	0.0605817	0.0288465	0.0427669	0.350245	0.116624	0.0590999	0.524378
Lipari Obsidian	2022-11-08	6	3 um 1 nA	22	Mean	74.4432	0.0821045	13.2118	1.56136	0.0931318	0.0401182	0.751759	3.95091	5.24409	0.0612045	99.4397
					1 σ	0.402946	0.0423513	0.207218	0.128593	0.0537593	0.0373614	0.0452925	0.295408	0.118187	0.0784946	0.656708
Old Crow Tephra	2022-02-28	4	3 um 1 nA	11	Mean	72.9127	0.297555	12.67	1.53727	0.0326909	0.2673	1.42291	3.50818	3.64364	0.0787818	96.3618
					1 σ	0.729193	0.0454162	0.223696	0.148667	0.0438949	0.0539032	0.0950779	0.337782	0.0853549	0.0608869	1.00365
Old Crow Tephra	2022-03-01	5	3 um 1 nA	10	Mean	72.906	0.29819	12.519	1.624	0.07008	0.28555	1.37886	3.588	3.663	0.06644	96.404
					1 σ	0.772229	0.0265024	0.208244	0.0852708	0.0626765	0.0535257	0.114328	0.328288	0.127284	0.105337	0.749165

## Sheet: 2.V19-30 Tephra
DATA TABLE NAME	EPMA V19-30 Sediment Core Tephra Analyses
TECHNIQUE	EPMA
INSTRUMENT	Jeol JXA-iSP100 Electron Probe
LABORATORY	University of St Andrews Electron Microprobe Facility
Sample ID	Analysed material	Sample Mount Name	Sample Top depth (cm)	Sample Bottom depth (cm)	Grain Number	Population Number	Suggested Source Volcano or Vent	Tephra Name	Analysis Date (DD-MM-YY)	Analytical Session (1-6)	Beam Diameter (um)	Beam Current (nA)	Number of Analyses	Data Type	Data Point Notes	SiO2	TiO2	Al2O3	FeO	MnO	MgO	CaO	Na2O	K2O	P2O5	total	Original Total
StA_V19-30_1	Glass shards from sediment core	V19-30	610	613	1	1	Atitlán Caldera	Los Chocoyos	2022-11-08	6	3	1	1	Single analysis		78.1283	0.154414	12.4401	0.618175	0.14096	0.0954223	0.619107	3.85001	3.95351		100	96.6231
StA_V19-30_2	Glass shards from sediment core	V19-30	610	613	2	1	Atitlán Caldera	Los Chocoyos	2022-11-08	6	3	1	1	Single analysis		77.8852	0.179482	12.6172	0.500264	0.0947836	0.0708047	0.614395	3.9416	3.99306	0.10312	99.9999	97.1687
StA_V19-30_3	Glass shards from sediment core	V19-30	610	613	3	1	Atitlán Caldera	Los Chocoyos	2022-11-08	6	3	1	1	Single analysis		77.9126	0.0334218	12.6328	0.673853		0.0851387	0.722401	3.29107	4.62999	0.0186017	99.9999	97.8404
StA_V19-30_4	Glass shards from sediment core	V19-30	610	613	4	1	Atitlán Caldera	Los Chocoyos	2022-11-08	6	3	1	1	Single analysis		77.6761	0.0883759	12.9513	0.606217	0.00768029	0.0133616	0.567184	3.22993	4.85016	0.00957406	99.9999	95.0485
StA_V19-30_5	Glass shards from sediment core	V19-30	610	613	5	1	Atitlán Caldera	Los Chocoyos	2022-11-08	6	3	1	1	Single analysis		77.6481	0.106353	12.9792	0.581122		0.0341775	0.656911	3.41775	4.38836	0.188028	100	96.8472
StA_V19-30_6	Glass shards from sediment core	V19-30	610	613	6	1	Atitlán Caldera	Los Chocoyos	2022-11-08	6	3	1	1	Single analysis		77.2764	0.0222883	13.3834	0.450369	0.0386121	0.0581797	0.681937	3.37986	4.70879		99.9999	95.566
StA_V19-30_7	Glass shards from sediment core	V19-30	610	613	7	1	Atitlán Caldera	Los Chocoyos	2022-11-08	6	3	1	1	Single analysis		78.1351	0.0620594	13.1735	0.493182		0.184017	0.669068	3.56095	3.68445	0.037565	99.9999	97.165
StA_V19-30_8	Glass shards from sediment core	V19-30	610	613	8	1	Atitlán Caldera	Los Chocoyos	2022-11-08	6	3	1	1	Single analysis		76.9079	0.109036	12.9186	0.688581	0.0376408	0.0534949	0.588751	4.23459	4.2755	0.185954	100	97.7663
StA_V19-30_9	Glass shards from sediment core	V19-30	610	613	9	1	Atitlán Caldera	Los Chocoyos	2022-11-08	6	3	1	1	Single analysis		77.1002	0.108756	13.1301	0.565179	0.107608	0.0598056	0.585114	3.42343	4.85334	0.0663811	99.9999	95.8104
StA_V19-30_10	Glass shards from sediment core	V19-30	610	613	10	1	Atitlán Caldera	Los Chocoyos	2022-11-08	6	3	1	1	Single analysis		77.7592	0.0348084	12.5782	0.704792	0.109456	0.156278	0.517505	3.9737	4.03531	0.130711	100	97.3904
StA_V19-30_11	Glass shards from sediment core	V19-30	610	613	11	1	Atitlán Caldera	Los Chocoyos	2022-11-08	6	3	1	1	Single analysis		77.0483	0.043024	12.8552	0.699712	0.0841774	0.151831	0.897269	3.57494	4.64535		99.9999	96.2253
StA_V19-30_12	Glass shards from sediment core	V19-30	610	613	12	1	Atitlán Caldera	Los Chocoyos	2022-11-08	6	3	1	1	Single analysis		77.5653	0.129413	12.7454	0.672948	0.113842	0.0651706	0.623348	3.29978	4.78467		99.9999	96.9763
StA_V19-30_13	Glass shards from sediment core	V19-30	610	613	13	1	Atitlán Caldera	Los Chocoyos	2022-11-08	6	3	1	1	Single analysis		77.276	0.0431919	12.7072	0.658729	0.149711	0.0794982	0.694723	3.71409	4.60088	0.0758467	99.9999	95.8512

## Sheet: 3.Ice Core Tephra Analyses
DATA TABLE NAME	EPMA Ice Core Tephra Analyses							Geochemistry References Used to Determine Volcanic Source of Ice Core Tephra:
TECHNIQUE	EPMA							1 Abbott, P. M. et al. A detailed framework of Marine Isotope Stages 4 and 5 volcanic events recorded in two Greenland ice-cores. Quat. Sci. Rev. 36, 59–77 (2012)
INSTRUMENT	Jeol JXA-iSP100 Electron Probe							2 Cisneros de León, A. et al. A history of violence : magma incubation , timing and tephra distribution of the Los Chocoyos supereruption ( Atitlán Caldera , Guatemala ). J. Quat. Sci. 36, 169–179 (2021)
LABORATORY	University of St Andrews Electron Microprobe Facility							3 Bourne, A. J. et al. Underestimated risks of recurrent long-range ash dispersal from northern Pacific Arc volcanoes. Sci. Rep. 6, 4–11 (2016)
								4 B. Narcisi, J. Robert Petit, M. Tiepolo, A volcanic marker (92 ka) for dating deep east Antarctic ice cores. Quat. Sci. Rev. 25, 2682–2687 (2006)
								+ This Study
Sample ID	Analysed material	Sample Mount Name	Ice Core	Sample Top depth (m)	Sample Bottom depth (m)	Grain Number	Population Number	Suggested Source Volcano or Vent	Tephra Name	GVP Volcano Number	Analysis Date (DD-MM-YY)	Analytical Session (1-6)	Beam Diameter (um)	Beam Current (nA)	Number of Analyses	Data Type	Data Point Notes	SiO2	TiO2	Al2O3	FeO	MnO	MgO	CaO	Na2O	K2O	P2O5	total	Original Total
StA_NEEM_556_1	Ice-core tephra, glass	NEEM556	NEEM	2049.65	2049.85	38		unknown			2021-12-20	3	5	5	1	Single analysis		75.1563	0.239632	13.7708	1.83945	0.188368	0.434634	2.44255	3.99051	1.84951	0.0881531	99.9999	99.486
StA_NEEM_556_2	Ice-core tephra, glass	NEEM556	NEEM	2049.65	2049.85	17		unknown			2021-12-02	2	5	5	1	Single analysis	Low Total	74.5119	0.199902	14.2271	1.60666	0.175918	0.41424	2.66613	4.45907	1.54845	0.190471	99.9999	85.8923
StA_NEEM_556_3	Ice-core tephra, glass	NEEM556	NEEM	2049.65	2049.85	18		unknown			2021-12-02	2	5	5	1	Single analysis		73.2591	0.323079	14.3741	2.1295	0.059292	0.332683	1.4823	4.73919	3.24645	0.0541771	99.9999	95.797
StA_NEEM_556_4	Ice-core tephra, glass	NEEM556	NEEM	2049.65	2049.85	41		unknown			2022-02-28	4	3	1	1	Single analysis	Beam Overlapping Resin, Low Total	73.0067	0.318689	13.9148	2.46026	0.193044	0.601676	3.60456	4.31403	1.47615	0.109968	99.9999	87.3892
StA_NEEM_556_5	Ice-core tephra, glass	NEEM556	NEEM	2049.65	2049.85	19		unknown			2021-12-02	2	5	5	1	Single analysis		70.9159	0.165895	16.9	1.3524	0.0836486	0.372662	4.51802	4.40783	1.20284	0.0806432	99.9999	99.8224
StA_NEEM_556_6	Ice-core tephra, glass	NEEM556	NEEM	2049.65	2049.85	42		unknown			2022-02-28	4	3	1	1	Single analysis	Low Total	70.6808	0.315206	14.9276	3.30027	0.245992	0.774799	3.62113	4.01838	1.4237	0.69214	100	65.4492
StA_NEEM_556_7	Ice-core tephra, glass	NEEM556	NEEM	2049.65	2049.85	39		unknown			2021-12-20	3	5	5	1	Single analysis		69.1333	0.136715	17.7184	1.69845	0.112391	0.485736	5.45182	3.82676	1.28957	0.14678	99.9999	95.381
StA_NEEM_556_8	Ice-core tephra, glass	NEEM556	NEEM	2049.65	2049.85	43	1	Grímsvötn, Iceland1		373010	2022-02-28	4	3	1	1	Single analysis	Beam Overlapping Resin	50.9337	2.92041	13.3257	13.1827	0.24027	6.61688	10.5891	1.67464	0.321552	0.195035	99.9999	97.9313
StA_NEEM_556_9	Ice-core tephra, glass	NEEM556	NEEM	2049.65	2049.85	20	1	Grímsvötn, Iceland1		373010	2021-12-02	2	5	5	1	Single analysis		50.2004	2.66452	13.5556	12.7147	0.210325	6.76769	10.7493	2.44164	0.386812	0.308801	99.9999	98.7043
StA_NEEM_556_10	Ice-core tephra, glass	NEEM556	NEEM	2049.65	2049.85	40	1	Grímsvötn, Iceland1		373010	2021-12-20	3	5	5	1	Single analysis		50.1882	2.69504	13.6094	13.766	0.218399	5.74794	10.1651	2.90752	0.332351	0.369926	99.9999	89.4234
StA_NEEM_556_11	Ice-core tephra, glass	NEEM556	NEEM	2049.65	2049.85	44	1	Grímsvötn, Iceland1		373010	2022-02-28	4	3	1	1	Single analysis		50.1157	2.76156	13.7569	13.3594	0.3374	5.92054	10.282	2.9348	0.33689	0.194838	100	98.1329
StA_NEEM_556_12	Ice-core tephra, glass	NEEM556	NEEM	2049.65	2049.85	21	1	Grímsvötn, Iceland1		373010	2021-12-02	2	5	5	1	Single analysis		49.9298	2.73533	13.747	14.0387	0.198311	5.60139	10.1871	2.89623	0.388578	0.277555	100	99.4396
StA_NEEM_556_13	Ice-core tephra, glass	NEEM556	NEEM	2049.65	2049.85	45	1	Grímsvötn, Iceland1		373010	2022-02-28	4	3	1	1	Single analysis		49.7633	2.79401	13.5609	13.3713	0.212943	7.03492	10.8567	1.71632	0.366614	0.323007	100	100.214
StA_NEEM_556_14	Ice-core tephra, glass	NEEM556	NEEM	2049.65	2049.85	46	1	Grímsvötn, Iceland1		373010	2022-02-28	4	3	1	1	Single analysis	Beam Overlapping Resin	49.6416	2.84486	13.3422	14.522	0.283162	5.92127	10.3209	2.38174	0.404234	0.337964	99.9999	90.69
StA_NEEM_556_15	Ice-core tephra, glass	NEEM556	NEEM	2049.65	2049.85	22	1	Grímsvötn, Iceland1		373010	2021-12-02	2	5	5	1	Single analysis		49.4373	2.71802	13.785	13.744	0.284623	6.03094	10.349	2.95393	0.352215	0.345035	100	97.4973
StA_NEEM_556_16	Ice-core tephra, glass	NEEM556	NEEM	2049.65	2049.85	23	1	Grímsvötn, Iceland1		373010	2021-12-02	2	5	5	1	Single analysis		49.4365	2.73909	14.2167	13.7466	0.240386	5.92789	9.91388	3.08659	0.338503	0.353834	100	97.8426
StA_NEEM_556_17	Ice-core tephra, glass	NEEM556	NEEM	2049.65	2049.85	47	1	Grímsvötn, Iceland1		373010	2022-02-28	4	3	1	1	Single analysis		49.3342	2.94724	13.5082	14.9818	0.109667	5.23242	9.7387	3.05402	0.359221	0.73446	99.9999	93.647
StA_NEEM_561_1	Ice-core tephra, glass	NEEM561	NEEM	2049.53	2049.56	48	2	Atitlán	Los Chocoyos2,+		2022-02-28	4	3	1	1	Single analysis		77.6889	0.105134	13.3024	0.390363		0.0378439	0.595445	3.23488	4.64495		99.9999	96.4488
StA_NEEM_562_1	Ice-core tephra, glass	NEEM562	NEEM	2049.5	2049.53	49		unknown			2022-02-28	4	3	1	1	Single analysis	Low Total	75.3727	0.43584	12.9142	4.00785	1.03211	0.431729	1.70134	1.28605	2.40928	0.408892	100	87.5781
StA_NEEM_564_1	Ice-core tephra, glass	NEEM564	NEEM	2049.44	2049.47	50		unknown			2022-02-28	4	3	1	1	Single analysis		76.1613	0.389314	12.41	1.83399	0.0726462	0.403375	1.8238	4.02458	2.79173	0.089254	100	98.1469
StA_NEEM_564_2	Ice-core tephra, glass	NEEM564	NEEM	2049.44	2049.47	51		unknown			2022-02-28	4	3	1	1	Single analysis		51.9743	3.85484	13.4462	14.5752	0.30971	4.45494	8.16738	1.87148	0.669868	0.676174	100	98.3179
StA_NEEM_565_1	Ice-core tephra, glass	NEEM565	NEEM	2049.41	2049.44	52	2	Atitlán	Los Chocoyos2,+		2022-02-28	4	3	1	1	Single analysis		76.301	0.0646302	13.0713	0.717986	0.0545674	0.114737	0.805958	4.38821	4.48158		99.9999	96.3946
StA_NEEM_566_1	Ice-core tephra, glass	NEEM566	NEEM	2049.38	2049.41	53	2	Atitlán	Los Chocoyos2,+		2022-02-28	4	3	1	1	Single analysis		76.5759	0.127227	13.5674	0.795376	0.00782132	0.108768	0.735412	3.62909	4.45294		99.9999	95.8918
StA_NEEM_566_2	Ice-core tephra, glass	NEEM566	NEEM	2049.38	2049.41	54	2	Atitlán	Los Chocoyos2,+		2022-02-28	4	3	1	1	Single analysis	Low Total	76.5383	0.265895	12.4948	0.80561	0.125862		0.761573	2.84942	5.65314	0.505278	99.9998	65.6273
StA_NEEM_571_1	Ice-core tephra, glass	NEEM571	NEEM	2049.24	2049.27	24	3	Eastern Aleutian Arc 3			2021-12-02	2	5	5	1	Single analysis		69.7947	0.692913	15.9666	3.65772	0.137576	0.812919	2.55835	3.55498	2.68165	0.142507	99.9999	97.3283
StA_NEEM_571_2	Ice-core tephra, glass	NEEM571	NEEM	2049.24	2049.27	1	3	Eastern Aleutian Arc 3			2021-11-04	1	5	5	1	Single analysis		69.668	0.682701	16.0396	3.77521	0.137846	0.854117	2.53041	3.33647	2.84672	0.128969	100	98.0077
StA_NEEM_571_3	Ice-core tephra, glass	NEEM571	NEEM	2049.24	2049.27	25	3	Eastern Aleutian Arc 3			2021-12-02	2	5	5	1	Single analysis		69.6348	0.719132	15.7724	3.9457	0.137116	0.868675	2.68225	3.47967	2.57868	0.181543	100	96.5609
StA_NEEM_571_4	Ice-core tephra, glass	NEEM571	NEEM	2049.24	2049.27	2	3	Eastern Aleutian Arc 3			2021-11-04	1	5	5	1	Single analysis		69.0032	0.666046	15.0512	3.29933	0.11909	0.824623	2.45093	5.55126	2.81752	0.216813	100	95.4739
StA_NEEM_571_5	Ice-core tephra, glass	NEEM571	NEEM	2049.24	2049.27	26	3	Eastern Aleutian Arc 3			2021-12-02	2	5	5	1	Single analysis		68.9841	0.606048	14.9624	3.60281	0.187285	0.808132	2.33723	5.56241	2.80672	0.142888	100	97.9791
StA_NEEM_571_6	Ice-core tephra, glass	NEEM571	NEEM	2049.24	2049.27	3	3	Eastern Aleutian Arc 3			2021-11-04	1	5	5	1	Single analysis		68.7192	0.660266	15.48	3.45156	0.0973089	0.810388	2.42233	5.2813	2.85897	0.218633	100	96.1885
StA_NEEM_571_7	Ice-core tephra, glass	NEEM571	NEEM	2049.24	2049.27	4	3	Eastern Aleutian Arc 3			2021-11-04	1	5	5	1	Single analysis		68.7089	0.665599	14.7865	3.53725	0.111259	0.776755	2.45756	5.8817	2.88944	0.184986	100	97.2508
StA_NEEM_571_8	Ice-core tephra, glass	NEEM571	NEEM	2049.24	2049.27	27	3	Eastern Aleutian Arc 3			2021-12-02	2	5	5	1	Single analysis		68.5572	0.66225	15.6259	3.55917	0.152507	0.856534	2.5046	4.98893	2.91021	0.182623	99.9999	98.6184
StA_NEEM_571_9	Ice-core tephra, glass	NEEM571	NEEM	2049.24	2049.27	28	3	Eastern Aleutian Arc 3			2021-12-02	2	5	5	1	Single analysis		68.4964	0.667525	15.7658	3.32654	0.0881028	0.803913	2.32858	5.47366	2.89308	0.156347	99.9999	99.2023
StA_NEEM_571_10	Ice-core tephra, glass	NEEM571	NEEM	2049.24	2049.27	29	3	Eastern Aleutian Arc 3			2021-12-02	2	5	5	1	Single analysis		68.478	0.668866	15.6257	3.5625	0.106054	0.907256	2.64877	4.96902	2.83357	0.200198	99.9999	97.4036
StA_NEEM_571_11	Ice-core tephra, glass	NEEM571	NEEM	2049.24	2049.27	30	3	Eastern Aleutian Arc 3			2021-12-02	2	5	5	1	Single analysis		68.2771	0.653951	15.7648	3.5898	0.128323	0.877227	2.64938	5.14707	2.78083	0.131458	99.9999	98.8912
StA_NEEM_571_12	Ice-core tephra, glass	NEEM571	NEEM	2049.24	2049.27	5	3	Eastern Aleutian Arc 3			2021-11-04	1	5	5	1	Single analysis		68.2546	0.697987	15.512	3.55546	0.114791	0.85717	2.39739	5.72937	2.72247	0.158777	100	98.4402
StA_NEEM_571_13	Ice-core tephra, glass	NEEM571	NEEM	2049.24	2049.27	6	3	Eastern Aleutian Arc 3			2021-11-04	1	5	5	1	Single analysis		68.232	0.674886	15.5611	3.46585	0.179219	0.837027	2.4713	5.70609	2.75258	0.119948	100	99.5428
StA_NEEM_571_14	Ice-core tephra, glass	NEEM571	NEEM	2049.24	2049.27	7	3	Eastern Aleutian Arc 3			2021-11-04	1	5	5	1	Single analysis		68.217	0.681057	15.4123	3.58238	0.0885475	0.784582	2.49957	5.75812	2.84364	0.132771	100	98.817
StA_NEEM_571_15	Ice-core tephra, glass	NEEM571	NEEM	2049.24	2049.27	31	3	Eastern Aleutian Arc 3			2021-12-02	2	5	5	1	Single analysis		68.1921	0.667519	15.7383	3.57972	0.146842	0.898061	2.57782	5.04083	2.93266	0.226055	99.9999	95.8175
StA_NEEM_571_16	Ice-core tephra, glass	NEEM571	NEEM	2049.24	2049.27	8	3	Eastern Aleutian Arc 3			2021-11-04	1	5	5	1	Single analysis		68.1856	0.719607	15.5358	3.45128	0.170742	0.829117	2.47966	5.62731	2.80353	0.197361	100	98.8039
StA_NEEM_571_17	Ice-core tephra, glass	NEEM571	NEEM	2049.24	2049.27	32	3	Eastern Aleutian Arc 3			2021-12-02	2	5	5	1	Single analysis		68.1793	0.668476	15.8072	3.72053	0.0986043	0.804794	2.56168	5.13352	2.86664	0.15919	99.9999	98.373
StA_NEEM_571_18	Ice-core tephra, glass	NEEM571	NEEM	2049.24	2049.27	9	3	Eastern Aleutian Arc 3			2021-11-04	1	5	5	1	Single analysis		68.1618	0.66831	15.6668	3.3975	0.0931541	0.844839	2.4095	5.67595	2.83293	0.249217	100	99.1905
StA_NEEM_571_19	Ice-core tephra, glass	NEEM571	NEEM	2049.24	2049.27	33	3	Eastern Aleutian Arc 3			2021-12-02	2	5	5	1	Single analysis		68.0931	0.669892	15.7508	3.6285	0.151579	0.859801	2.52462	5.22299	2.91302	0.185616	99.9999	97.8366
StA_NEEM_571_20	Ice-core tephra, glass	NEEM571	NEEM	2049.24	2049.27	10	3	Eastern Aleutian Arc 3			2021-11-04	1	5	5	1	Single analysis		68.0652	0.691752	15.5389	3.51975	0.134891	0.865339	2.47983	5.6596	2.8498	0.194886	100	100.007
StA_NEEM_571_21	Ice-core tephra, glass	NEEM571	NEEM	2049.24	2049.27	34	3	Eastern Aleutian Arc 3			2021-12-02	2	5	5	1	Single analysis		68.0396	0.674847	15.9328	3.74354	0.162355	0.839926	2.57305	5.08557	2.80513	0.143082	99.9999	99.104
StA_NEEM_571_22	Ice-core tephra, glass	NEEM571	NEEM	2049.24	2049.27	11	3	Eastern Aleutian Arc 3			2021-11-04	1	5	5	1	Single analysis		68.0291	0.706557	15.5368	3.66108	0.0943158	0.840526	2.49481	5.5981	2.84976	0.189037	100	98.6049
StA_NEEM_571_23	Ice-core tephra, glass	NEEM571	NEEM	2049.24	2049.27	12	3	Eastern Aleutian Arc 3			2021-11-04	1	5	5	1	Single analysis		68.0002	0.71173	15.6939	3.5031	0.178558	0.867968	2.6023	5.43481	2.81249	0.194973	100	99.9115
StA_NEEM_571_24	Ice-core tephra, glass	NEEM571	NEEM	2049.24	2049.27	13	3	Eastern Aleutian Arc 3			2021-11-04	1	5	5	1	Single analysis		68.0001	0.75683	15.6072	3.5599	0.121881	0.904857	2.54422	5.6717	2.74534	0.0879918	100	99.4411
StA_NEEM_571_25	Ice-core tephra, glass	NEEM571	NEEM	2049.24	2049.27	14	3	Eastern Aleutian Arc 3			2021-11-04	1	5	5	1	Single analysis		67.9894	0.664015	15.6381	3.50751	0.124622	0.842003	2.48239	5.73865	2.81405	0.199295	100	99.5008
StA_NEEM_571_26	Ice-core tephra, glass	NEEM571	NEEM	2049.24	2049.27	15	3	Eastern Aleutian Arc 3			2021-11-04	1	5	5	1	Single analysis		67.9718	0.71185	15.5626	3.69675	0.113018	0.822551	2.54844	5.63074	2.81033	0.131955	100	99.2765
StA_NEEM_571_27	Ice-core tephra, glass	NEEM571	NEEM	2049.24	2049.27	16	3	Eastern Aleutian Arc 3			2021-11-04	1	5	5	1	Single analysis		67.9661	0.680775	15.4763	3.6081	0.120101	0.888951	2.46283	5.76688	2.86824	0.161756	100	98.6669
StA_NEEM_571_28	Ice-core tephra, glass	NEEM571	NEEM	2049.24	2049.27	35	3	Eastern Aleutian Arc 3			2021-12-02	2	5	5	1	Single analysis		67.8363	0.663802	15.8067	3.54496	0.168612	0.874391	2.60098	5.42289	2.87212	0.209183	100	99.5779
StA_NEEM_571_29	Ice-core tephra, glass	NEEM571	NEEM	2049.24	2049.27	36	3	Eastern Aleutian Arc 3			2021-12-02	2	5	5	1	Single analysis		67.8352	0.674443	15.6635	3.66785	0.155132	0.809933	2.806	5.26126	2.87615	0.250436	99.9999	99.786
StA_NEEM_571_30	Ice-core tephra, glass	NEEM571	NEEM	2049.24	2049.27	37	3	Eastern Aleutian Arc 3			2021-12-02	2	5	5	1	Single analysis		67.5544	0.708041	15.7415	3.75722	0.138305	0.784481	2.52641	5.68981	2.82871	0.271211	100	92.6217
StA_EDC_206_1	Ice-core tephra, glass	EDC206	EDC	1140.68	1140.7	55	2	Atitlán	Los Chocoyos2,+		2022-03-01	5	3	1	1	Single analysis	Beam Overlapping Resin, Low Total	76.6994	0.0780338	13.228	0.858082	0.0600483	0.0733924	0.738855	3.06043	5.07655	0.127204	100	68.9445
StA_EDC_205_1	Ice-core tephra, glass	EDC205	EDC	1140.66	1140.68	56	2	Atitlán	Los Chocoyos2,+		2022-03-01	5	3	1	1	Single analysis		78.1676	0.0823963	12.1614	0.599354	0.0894277	0.108838	0.700072	3.09976	4.99131		100	100.975
StA_EDC_205_2	Ice-core tephra, glass	EDC205	EDC	1140.66	1140.68	57		unknown			2022-03-01	5	3	1	1	Single analysis		61.9884	0.0592423	17.8858	0.345889	0.0656191	2.49929	9.62688	4.41232	3.11639		99.9999	97.2278
StA_EDC_198_1	Ice-core tephra, glass	EDC198	EDC	1140.59	1140.6	58		unknown			2022-03-01	5	3	1	1	Single analysis		70.9183	0.269703	15.1668	0.813098	0.0647848	0.0481844	0.156087	4.40881	7.97683	0.177323	99.9999	92.7687
StA_EDC_198_2	Ice-core tephra, glass	EDC198	EDC	1140.59	1140.6	59		unknown			2022-03-01	5	3	1	1	Single analysis	Low Total	68.8294	0.477936	14.6917	4.37109	0.147372	1.10507	3.6881	2.92924	2.95959	0.800304	99.9998	65.8875
StA_EDC_198_3	Ice-core tephra, glass	EDC198	EDC	1140.59	1140.6	60	4	Mt Berlin, Antarctica 4		390022	2022-03-01	5	3	1	1	Single analysis		61.8497	0.449966	15.047	9.7011	0.202072		1.12997	6.66693	4.82991	0.123225	99.9999	96.8962
StA_EDC_198_4	Ice-core tephra, glass	EDC198	EDC	1140.59	1140.6	61	4	Mt Berlin, Antarctica 4		390022	2022-03-01	5	3	1	1	Single analysis		61.5058	0.49185	14.7516	8.40416	0.495097		1.10169	8.85684	4.35953	0.0335576	100	101.616
StA_EDC_198_5	Ice-core tephra, glass	EDC198	EDC	1140.59	1140.6	62	4	Mt Berlin, Antarctica 4		390022	2022-03-01	5	3	1	1	Single analysis		60.4162	0.537718	13.1344	11.3653	0.352273	0.00668548	1.09158	8.04315	5.00897	0.0436099	99.9999	97.2256
StA_EDC_198_6	Ice-core tephra, glass	EDC198	EDC	1140.59	1140.6	63	4	Mt Berlin, Antarctica 4		390022	2022-03-01	5	3	1	1	Single analysis	Beam Overlapping Resin, Low Total	60.1657	0.500632	15.4172	8.92492	0.211967	0.0828964	1.01025	8.84745	4.41598	0.422849	99.9998	64.5384
StA_EDC_198_7	Ice-core tephra, glass	EDC198	EDC	1140.59	1140.6	64	4	Mt Berlin, Antarctica 4		390022	2022-03-01	5	3	1	1	Single analysis	Beam Overlapping Resin	58.813	0.513219	16.0101	9.09862	0.323154	0.199907	1.15395	9.10956	4.46183	0.316593	99.9999	91.4424
StA_EDC_197_1	Ice-core tephra, glass	EDC197	EDC	1140.58	1140.59	65		unknown			2022-03-01	5	3	1	1	Single analysis	Beam Overlapping Resin, Low Total	61.2775	0.614785	13.7244	7.84062	0.104542	4.63736	7.43854	3.61875	0.308666	0.434652	99.9999	74.6114
StA_EDC_190_1	Ice-core tephra, glass	EDC190	EDC	1140.51	1140.52	66		unknown			2022-03-01	5	3	1	1	Single analysis	Beam Overlapping Resin, Low Total	71.895	0.41266	13.7078	3.46653	0.106529	0.360899	0.954326	4.49541	4.35295	0.247881	100	63.1755
StA_EDC_190_2	Ice-core tephra, glass	EDC190	EDC	1140.47	1140.48	67		unknown			2022-03-01	5	3	1	1	Single analysis		77.7635	0.0931181	12.9771	0.776743	0.182472	0.163353	0.844601	3.58604	3.44735	0.16573	100	100.947
StA_EDC_190_3	Ice-core tephra, glass	EDC190	EDC	1140.47	1140.48	68		unknown			2022-03-01	5	3	1	1	Single analysis		75.4767	0.0835848	13.8764	0.643538	0.224743	0.229314	0.911271	5.11522	3.43917		99.9999	91.8827
StA_EDC_186_1	Ice-core tephra, glass	EDC186	EDC	1140.47	1140.48	69		unknown			2022-03-01	5	3	1	1	Single analysis	Beam Overlapping Resin, Low Total	64.3553	0.953174	14.9522	5.52314	0.121346	2.29877	4.61788	5.04508	1.73933	0.39374	99.9999	98.3136

## Sheet: 4.Proximal LCY Analyses
DATA TABLE NAME	EPMA Proximal Los Chocoyos Tephra Analysis
TECHNIQUE	EPMA
INSTRUMENT	Jeol JXA-iSP100 Electron Probe
LABORATORY	University of St Andrews Electron Microprobe Facility
Sample ID	Analysed material	Sample Mount Name	Suggested Source Volcano or Vent	Tephra Name	Sample Desription	Analysis Date (DD-MM-YY)	Analytical Session (1-6)	Beam Diameter (um)	Beam Current (nA)	Number of Analyses	Data Type	SiO2	TiO2	Al2O3	FeO	MnO	MgO	CaO	Na2O	K2O	P2O5	total	Original Total
StA_LCY_1	Glass Shards, 63-125 um	LCY-2	Atitlán Caldera	Los Chocoyos	Terrestrial Initial tephra fall deposit	2021-12-02	2	5	5	1	Single Analysis	77.4248	0.0913998	13.0632	0.510864	0.0576816	0.0807966	0.659839	3.6263	4.48517		100	94.3109
StA_LCY_2	Glass Shards, 63-125 um	LCY-2	Atitlán Caldera	Los Chocoyos	Terrestrial Initial tephra fall deposit	2021-12-02	2	5	5	1	Single Analysis	77.7307	0.0722224	12.6982	0.46923	0.0285656	0.0697431	0.666602	3.81593	4.41958	0.0291046	99.9999	92.769
StA_LCY_3	Glass Shards, 63-125 um	LCY-2	Atitlán Caldera	Los Chocoyos	Terrestrial Initial tephra fall deposit	2021-12-02	2	5	5	1	Single Analysis	77.3965	0.0938842	12.5742	0.605712	0.0888208	0.048208	0.68103	3.28067	5.17946	0.0514781	99.9999	94.7976
StA_LCY_4	Glass Shards, 63-125 um	LCY-2	Atitlán Caldera	Los Chocoyos	Terrestrial Initial tephra fall deposit	2021-12-02	2	5	5	1	Single Analysis	77.763	0.0949623	12.9658	0.499958	0.0619642	0.0609032	0.648609	3.41652	4.48816		99.9999	94.2479
StA_LCY_5	Glass Shards, 63-125 um	LCY-2	Atitlán Caldera	Los Chocoyos	Terrestrial Initial tephra fall deposit	2021-12-02	2	5	5	1	Single Analysis	77.4609	0.0999013	13.0064	0.468809	0.0237453	0.068134	0.662407	3.17673	5.00576	0.0270611	99.9999	93.4923
StA_LCY_6	Glass Shards, 63-125 um	LCY-2	Atitlán Caldera	Los Chocoyos	Terrestrial Initial tephra fall deposit	2021-12-02	2	5	5	1	Single Analysis	77.1737	0.0793284	13.0999	0.538683	0.0544579	0.0884405	0.648349	2.85153	5.45651	0.00900485	99.9999	93.2831
StA_LCY_7	Glass Shards, 63-125 um	LCY-2	Atitlán Caldera	Los Chocoyos	Terrestrial Initial tephra fall deposit	2021-12-02	2	5	5	1	Single Analysis	77.4298	0.060033	12.9578	0.535223	0.0825453	0.0444963	0.622736	3.57238	4.66101	0.0338214	99.9999	94.6147
StA_LCY_8	Glass Shards, 63-125 um	LCY-2	Atitlán Caldera	Los Chocoyos	Terrestrial Initial tephra fall deposit	2021-12-02	2	5	5	1	Single Analysis	77.6285	0.109123	13.1933	0.478471	0.0732485	0.100449	0.663735	3.76952	3.98369		100	93.3807
StA_LCY_9	Glass Shards, 63-125 um	LCY-2	Atitlán Caldera	Los Chocoyos	Terrestrial Initial tephra fall deposit	2021-12-02	2	5	5	1	Single Analysis	77.7674	0.0969857	12.7386	0.543414	0.104139	0.123914	0.72897	3.82893	4.04984	0.0177772	99.9999	95.0656
StA_LCY_10	Glass Shards, 63-125 um	LCY-2	Atitlán Caldera	Los Chocoyos	Terrestrial Initial tephra fall deposit	2021-12-02	2	5	5	1	Single Analysis	77.575	0.0759195	13.0328	0.575301	0.040385	0.0728616	0.679796	3.85924	4.01741	0.07128	100	94.8373
StA_LCY_11	Glass Shards, 63-125 um	LCY-2	Atitlán Caldera	Los Chocoyos	Terrestrial Initial tephra fall deposit	2021-12-02	2	5	5	1	Single Analysis	77.9874	0.0995336	12.7352	0.579326	0.0922352	0.0652628	0.625655	3.94538	3.85019	0.019674	99.9999	94.5409
StA_LCY_12	Glass Shards, 63-125 um	LCY-2	Atitlán Caldera	Los Chocoyos	Terrestrial Initial tephra fall deposit	2021-12-02	2	5	5	1	Single Analysis	77.5052	0.102855	13.0072	0.547189	0.0580208	0.12311	0.681059	4.06146	3.91377		99.9999	94.7936
StA_LCY_13	Glass Shards, 63-125 um	LCY-2	Atitlán Caldera	Los Chocoyos	Terrestrial Initial tephra fall deposit	2021-12-02	2	5	5	1	Single Analysis	77.7374	0.106216	12.8894	0.579708	0.0653964	0.0852263	0.644682	3.81831	4.03981	0.0338585	100	94.8064
StA_LCY_14	Glass Shards, 63-125 um	LCY-2	Atitlán Caldera	Los Chocoyos	Terrestrial Initial tephra fall deposit	2021-12-02	2	5	5	1	Single Analysis	78.2682	0.0593643	12.4939	0.548172	0.0418918	0.090099	0.627746	3.39976	4.41022	0.0605221	99.9999	95.0066
StA_LCY_15	Glass Shards, 63-125 um	LCY-2	Atitlán Caldera	Los Chocoyos	Terrestrial Initial tephra fall deposit	2021-12-02	2	5	5	1	Single Analysis	77.5576	0.0824406	13.1588	0.502993	0.0641557	0.109604	0.678444	3.76267	4.07975	0.00359356	100	94.6136
StA_LCY_16	Glass Shards, 63-125 um	LCY-2	Atitlán Caldera	Los Chocoyos	Terrestrial Initial tephra fall deposit	2021-12-02	2	5	5	1	Single Analysis	77.5752	0.0932003	13.1073	0.568934	0.0515193	0.0842082	0.66425	3.75552	4.06231	0.0375552	100	94.5276
StA_LCY_17	Glass Shards, 63-125 um	LCY-2	Atitlán Caldera	Los Chocoyos	Terrestrial Initial tephra fall deposit	2021-12-02	2	5	5	1	Single Analysis	77.686	0.062616	12.9021	0.525027	0.111551	0.0935557	0.663204	2.98873	4.96719		99.9999	95.0236
StA_LCY_18	Glass Shards, 63-125 um	LCY-2	Atitlán Caldera	Los Chocoyos	Terrestrial Initial tephra fall deposit	2021-12-02	2	5	5	1	Single Analysis	77.6808	0.105689	12.9819	0.4707	0.0867218	0.0962053	0.658474	3.78288	4.08846	0.04805	99.9999	94.9012
StA_LCY_19	Glass Shards, 63-125 um	LCY-2	Atitlán Caldera	Los Chocoyos	Terrestrial Initial tephra fall deposit	2021-12-02	2	5	5	1	Single Analysis	77.7306	0.100264	12.8971	0.493719	0.0420051	0.1162	0.633138	3.82057	4.09497	0.0713454	99.9999	94.7503
StA_LCY_20	Glass Shards, 63-125 um	LCY-2	Atitlán Caldera	Los Chocoyos	Terrestrial Initial tephra fall deposit	2021-12-02	2	5	5	1	Single Analysis	77.556	0.104917	13.0194	0.556102	0.0559486	0.0795338	0.64801	3.81805	4.15649	0.00539391	99.9999	94.551
StA_LCY_21	Glass Shards, 63-125 um	LCY-2	Atitlán Caldera	Los Chocoyos	Terrestrial Initial tephra fall deposit	2021-12-02	2	5	5	1	Single Analysis	77.8302	0.0978407	12.8594	0.480567	0.125539	0.0893099	0.595048	3.68614	4.21273	0.02317	99.9999	94.9503
StA_LCY_22	Glass Shards, 63-125 um	LCY-2	Atitlán Caldera	Los Chocoyos	Terrestrial Initial tephra fall deposit	2021-12-02	2	5	5	1	Single Analysis	77.6017	0.116492	12.9108	0.631033	0.134786	0.0949388	0.566899	3.69031	4.23703	0.0159808	100	95.1139
StA_LCY_23	Glass Shards, 63-125 um	LCY-2	Atitlán Caldera	Los Chocoyos	Terrestrial Initial tephra fall deposit	2021-12-02	2	5	5	1	Single Analysis	77.8653	0.110798	12.8031	0.474698	0.0294968	0.111115	0.621337	3.7849	4.18665	0.0124754	99.9999	94.5864
StA_LCY_24	Glass Shards, 63-125 um	LCY-2	Atitlán Caldera	Los Chocoyos	Terrestrial Initial tephra fall deposit	2021-12-02	2	5	5	1	Single Analysis	77.7339	0.0978298	13.1323	0.527306	0.106521	0.110125	0.633615	3.72029	3.91107	0.0269218	99.9999	94.3475
StA_LCY_25	Glass Shards, 63-125 um	LCY-2	Atitlán Caldera	Los Chocoyos	Terrestrial Initial tephra fall deposit	2021-12-02	2	5	5	1	Single Analysis	77.6858	0.0835377	12.8169	0.549886	0.0982734	0.0923367	0.683037	4.01787	3.94366	0.0287293	100	94.3287
StA_LCY_26	Glass Shards, 63-125 um	LCY-2	Atitlán Caldera	Los Chocoyos	Terrestrial Initial tephra fall deposit	2021-12-02	2	5	5	1	Single Analysis	77.6934	0.103627	12.9401	0.570742	0.0473055	0.0660792	0.61985	3.54261	4.39114	0.0251377	100	94.2808
StA_LCY_27	Glass Shards, 63-125 um	LCY-2	Atitlán Caldera	Los Chocoyos	Terrestrial Initial tephra fall deposit	2021-12-02	2	5	5	1	Single Analysis	77.8324	0.112807	12.8574	0.540329	0.0782028	0.111643	0.658956	3.7567	4.04242	0.00899491	99.9999	94.4979
StA_LCY_28	Glass Shards, 63-125 um	LCY-2	Atitlán Caldera	Los Chocoyos	Terrestrial Initial tephra fall deposit	2021-12-02	2	5	5	1	Single Analysis	77.4906	0.137639	12.9274	0.616833	0.0760189	0.130016	0.667548	3.91741	3.98093	0.055479	99.9999	94.4502
StA_LCY_29	Glass Shards, 63-125 um	LCY-2	Atitlán Caldera	Los Chocoyos	Terrestrial Initial tephra fall deposit	2021-12-02	2	5	5	1	Single Analysis	77.6854	0.126192	13.0452	0.541508	0.0488795	0.0922215	0.62766	3.76979	4.02537	0.0378044	100	93.9044
StA_LCY_30	Glass Shards, 63-125 um	LCY-2	Atitlán Caldera	Los Chocoyos	Terrestrial Initial tephra fall deposit	2021-12-02	2	5	5	1	Single Analysis	77.6084	0.0856869	13.1088	0.636683	0.0163061	0.098476	0.671853	3.74081	3.97527	0.0575509	99.9999	93.83
StA_LCY_31	Glass Shards, 63-125 um	LCY-2	Atitlán Caldera	Los Chocoyos	Terrestrial Initial tephra fall deposit	2021-12-02	2	5	5	1	Single Analysis	77.7882	0.0645316	12.9169	0.545971	0.0923396	0.095736	0.595856	3.96954	3.90586	0.0250485	100	94.2174
StA_LCY_32	Glass Shards, 63-125 um	LCY-2	Atitlán Caldera	Los Chocoyos	Terrestrial Initial tephra fall deposit	2021-12-02	2	5	5	1	Single Analysis	77.944	0.0836687	12.706	0.579559		0.09355	0.612103	3.96325	3.96325	0.0544545	99.9999	93.1053
StA_LCY_33	Glass Shards, 63-125 um	LCY-2	Atitlán Caldera	Los Chocoyos	Terrestrial Initial tephra fall deposit	2021-12-02	2	5	5	1	Single Analysis	77.4109	0.113651	13.1473	0.654375	0.0817435	0.0815301	0.648719	3.93778	3.89509	0.028813	99.9999	93.7077
StA_LCY_34	Glass Shards, 63-125 um	LCY-2	Atitlán Caldera	Los Chocoyos	Terrestrial Initial tephra fall deposit	2021-12-02	2	5	5	1	Single Analysis	77.6545	0.110375	12.9124	0.551134	0.0656743	0.105926	0.649964	3.80275	4.14172	0.00540224	99.9999	94.4053
StA_LCY_35	Glass Shards, 63-125 um	LCY-2	Atitlán Caldera	Los Chocoyos	Terrestrial Initial tephra fall deposit	2021-12-02	2	5	5	1	Single Analysis	78.1852	0.0985527	12.7849	0.473053	0.0969371	0.106846	0.570852	3.78055	3.86671	0.0364053	100	92.8437
StA_LCY_36	Glass Shards, 63-125 um	LCY-2	Atitlán Caldera	Los Chocoyos	Terrestrial Initial tephra fall deposit	2021-12-02	2	5	5	1	Single Analysis	77.6427	0.0878657	12.8548	0.535792	0.110514	0.109255	0.669268	3.68029	4.3094		99.9999	95.3728
StA_LCY_37	Glass Shards, 63-125 um	LCY-2	Atitlán Caldera	Los Chocoyos	Terrestrial Initial tephra fall deposit	2021-12-02	2	5	5	1	Single Analysis	77.4936	0.0887662	12.8875	0.564262	0.0839109	0.0863386	0.666221	4.07417	4.02139	0.033881	100	94.7433
StA_LCY_38	Glass Shards, 63-125 um	LCY-2	Atitlán Caldera	Los Chocoyos	Terrestrial Initial tephra fall deposit	2021-12-02	2	5	5	1	Single Analysis	77.8127	0.0639016	13.047	0.642963	0.104227	0.0973992	0.630481	3.62713	3.95784	0.0162154	99.9999	93.7379
StA_LCY_39	Glass Shards, 63-125 um	LCY-2	Atitlán Caldera	Los Chocoyos	Terrestrial Initial tephra fall deposit	2021-12-02	2	5	5	1	Single Analysis	78.0466	0.0840059	12.9527	0.630471	0.00970119	0.109591	0.687932	3.51801	3.93378	0.0270781	99.9999	93.8029
StA_LCY_40	Glass Shards, 63-125 um	LCY-2	Atitlán Caldera	Los Chocoyos	Terrestrial Initial tephra fall deposit	2021-12-02	2	5	5	1	Single Analysis	77.6759	0.0899383	12.8845	0.654135	0.0249887	0.0858262	0.607637	3.86956	4.05935	0.048185	100	94.8428
StA_LCY_41	Glass Shards, 63-125 um	LCY-2	Atitlán Caldera	Los Chocoyos	Terrestrial Initial tephra fall deposit	2021-12-02	2	5	5	1	Single Analysis	77.6971	0.0876307	12.9601	0.565645	0.0839399	0.0868925	0.640727	3.85955	3.97554	0.0428135	99.9999	94.8298
StA_LCY_42	Glass Shards, 63-125 um	LCY-2	Atitlán Caldera	Los Chocoyos	Terrestrial Initial tephra fall deposit	2021-12-02	2	5	5	1	Single Analysis	77.5389	0.112622	13.0259	0.512534	0.128984	0.0718228	0.657668	3.963	3.94176	0.0467486	99.9999	94.1205
StA_LCY_43	Glass Shards, 63-125 um	LCY-2	Atitlán Caldera	Los Chocoyos	Terrestrial Initial tephra fall deposit	2021-12-02	2	5	5	1	Single Analysis	77.5846	0.0994948	13.1804	0.607025	0.085159	0.0989599	0.637944	3.88351	3.81932	0.00363745	100	93.4722
StA_LCY_44	Glass Shards, 63-125 um	LCY-2	Atitlán Caldera	Los Chocoyos	Terrestrial Initial tephra fall deposit	2021-12-02	2	5	5	1	Single Analysis	77.6002	0.0904756	13.0546	0.557722	0.0397544	0.100388	0.682996	3.88054	3.97544	0.017821	100	94.8322
StA_LCY_45	Glass Shards, 63-125 um	LCY-2	Atitlán Caldera	Los Chocoyos	Terrestrial Initial tephra fall deposit	2021-12-02	2	5	5	1	Single Analysis	77.793	0.0851455	12.9514	0.62021	0.0596864	0.0481716	0.652641	3.65513	4.09882	0.0358118	100	94.6615
StA_LCY_46	Glass Shards, 63-125 um	LCY-3	Atitlán Caldera	Los Chocoyos	Terrestrial Ignimbrite Deposit	2021-12-02	2	5	5	1	Single Analysis	78.1383	0.10267	12.8232	0.554058	0.0772126	0.0500725	0.596136	3.41881	4.22881	0.0106246	99.9999	95.0622
StA_LCY_47	Glass Shards, 63-125 um	LCY-3	Atitlán Caldera	Los Chocoyos	Terrestrial Ignimbrite Deposit	2021-12-02	2	5	5	1	Single Analysis	78.2759	0.0859472	12.7294	0.609606	0.0428162	0.0747184	0.552308	3.62049	4.00877		100	95.2911
StA_LCY_48	Glass Shards, 63-125 um	LCY-3	Atitlán Caldera	Los Chocoyos	Terrestrial Ignimbrite Deposit	2021-12-02	2	5	5	1	Single Analysis	77.385	0.0968231	13.2843	0.548699	0.0857966	0.102704	0.652033	3.88553	3.95904		99.9999	95.2252
StA_LCY_49	Glass Shards, 63-125 um	LCY-3	Atitlán Caldera	Los Chocoyos	Terrestrial Ignimbrite Deposit	2021-12-02	2	5	5	1	Single Analysis	77.8869	0.0967481	12.73	0.532894	0.0540376	0.0896816	0.607923	3.88655	4.11517		99.9999	96.2293
StA_LCY_50	Glass Shards, 63-125 um	LCY-3	Atitlán Caldera	Los Chocoyos	Terrestrial Ignimbrite Deposit	2021-12-02	2	5	5	1	Single Analysis	78.2792	0.0854851	12.7336	0.448509	0.00220268	0.08087	0.651575	3.9019	3.77603	0.0405923	100	95.3382
StA_LCY_51	Glass Shards, 63-125 um	LCY-3	Atitlán Caldera	Los Chocoyos	Terrestrial Ignimbrite Deposit	2021-12-02	2	5	5	1	Single Analysis	77.8027	0.0819846	12.7623	0.575751	0.107902	0.0840497	0.562327	3.75849	4.26444		100	96.8475
StA_LCY_52	Glass Shards, 63-125 um	LCY-3	Atitlán Caldera	Los Chocoyos	Terrestrial Ignimbrite Deposit	2021-12-02	2	5	5	1	Single Analysis	77.7246	0.0933114	13.0343	0.420947	0.0941483	0.122393	0.585184	3.93331	3.90192	0.0897547	99.9999	95.5939
StA_LCY_53	Glass Shards, 63-125 um	LCY-3	Atitlán Caldera	Los Chocoyos	Terrestrial Ignimbrite Deposit	2021-12-02	2	5	5	1	Single Analysis	78.1395	0.0954449	12.8569	0.583498	0.0652932	0.094277	0.648261	3.50354	4.01314		99.9999	94.1905
StA_LCY_54	Glass Shards, 63-125 um	LCY-3	Atitlán Caldera	Los Chocoyos	Terrestrial Ignimbrite Deposit	2021-12-02	2	5	5	1	Single Analysis	77.9262	0.0856528	12.8951	0.580279	0.0420401	0.0817738	0.669182	3.12418	4.59191	0.0035645	99.9999	95.3851
StA_LCY_55	Glass Shards, 63-125 um	LCY-3	Atitlán Caldera	Los Chocoyos	Terrestrial Ignimbrite Deposit	2021-12-02	2	5	5	1	Single Analysis	77.882	0.1005	12.7549	0.604142	0.0814608	0.0914484	0.651479	3.70371	4.13026		99.9999	96.1198
StA_LCY_56	Glass Shards, 63-125 um	LCY-3	Atitlán Caldera	Los Chocoyos	Terrestrial Ignimbrite Deposit	2021-12-02	2	5	5	1	Single Analysis	77.7369	0.108665	13.092	0.555756	0.107724	0.120367	0.595252	3.66743	4.00178	0.014001	99.9999	95.7074
StA_LCY_57	Glass Shards, 63-125 um	LCY-3	Atitlán Caldera	Los Chocoyos	Terrestrial Ignimbrite Deposit	2021-12-02	2	5	5	1	Single Analysis	77.8736	0.0934442	12.7766	0.576884	0.141893	0.0735624	0.622403	3.81939	3.97635	0.045728	99.9999	95.5651
StA_LCY_58	Glass Shards, 63-125 um	LCY-3	Atitlán Caldera	Los Chocoyos	Terrestrial Ignimbrite Deposit	2021-12-02	2	5	5	1	Single Analysis	78.8152	0.0714999	12.4092	0.551438	0.0149819	0.0799724	0.569932	3.39934	4.06061	0.027794	99.9999	96.7834
StA_LCY_59	Glass Shards, 63-125 um	LCY-3	Atitlán Caldera	Los Chocoyos	Terrestrial Ignimbrite Deposit	2021-12-02	2	5	5	1	Single Analysis	77.7104	0.106518	13.0386	0.500594	0.0702478	0.0657662	0.610864	3.80422	4.03352	0.0592	99.9999	95.946
StA_LCY_60	Glass Shards, 63-125 um	LCY-3	Atitlán Caldera	Los Chocoyos	Terrestrial Ignimbrite Deposit	2021-12-02	2	5	5	1	Single Analysis	77.9979	0.0899295	13.0257	0.506752	0.0744028	0.0936809	0.658267	3.49089	4.01192	0.0504355	99.9999	95.9641
StA_LCY_61	Glass Shards, 63-125 um	LCY-3	Atitlán Caldera	Los Chocoyos	Terrestrial Ignimbrite Deposit	2021-12-02	2	5	5	1	Single Analysis	77.8615	0.0787966	13.0172	0.640143	0.0511652	0.087937	0.600535	3.61414	3.99236	0.0561032	99.9999	95.1818
StA_LCY_62	Glass Shards, 63-125 um	LCY-3	Atitlán Caldera	Los Chocoyos	Terrestrial Ignimbrite Deposit	2021-12-02	2	5	5	1	Single Analysis	78.0077	0.0634558	12.9839	0.584587	0.0250896	0.0846774	0.587828	3.53345	4.12933		100	95.6572
StA_LCY_63	Glass Shards, 63-125 um	LCY-3	Atitlán Caldera	Los Chocoyos	Terrestrial Ignimbrite Deposit	2021-12-02	2	5	5	1	Single Analysis	77.8886	0.098861	12.9183	0.562634	0.0638017	0.0724349	0.663811	4.02182	3.65333	0.0563266	99.9999	94.9818
StA_LCY_64	Glass Shards, 63-125 um	LCY-3	Atitlán Caldera	Los Chocoyos	Terrestrial Ignimbrite Deposit	2021-12-02	2	5	5	1	Single Analysis	78.1637	0.0846042	12.807	0.479389	0.0872481	0.0940165	0.574357	3.76489	3.9341	0.0105755	99.9999	94.5579
StA_LCY_65	Glass Shards, 63-125 um	LCY-3	Atitlán Caldera	Los Chocoyos	Terrestrial Ignimbrite Deposit	2021-12-02	2	5	5	1	Single Analysis	78.0199	0.0793405	12.9859	0.604434	0.100931	0.0864676	0.618584	3.79409	3.69976	0.0104809	99.9999	95.4115
StA_LCY_66	Glass Shards, 63-125 um	LCY-1	Atitlán Caldera	Los Chocoyos	Marine Ash Layer Core M66-229	2021-12-02	2	5	5	1	Single Analysis	77.9745	0.0890362	13.001	0.434651	0.0665165	0.0491055	0.586555	3.82626	3.9618	0.01053	99.9999	95.916
StA_LCY_67	Glass Shards, 63-125 um	LCY-1	Atitlán Caldera	Los Chocoyos	Marine Ash Layer Core M66-229	2021-12-02	2	5	5	1	Single Analysis	77.956	0.0880586	12.7486	0.553975	0.111694	0.0964253	0.620594	3.93231	3.89048	0.00177791	99.9999	95.6181
StA_LCY_68	Glass Shards, 63-125 um	LCY-1	Atitlán Caldera	Los Chocoyos	Marine Ash Layer Core M66-229	2021-12-02	2	5	5	1	Single Analysis	77.7589	0.0819554	12.9425	0.534008	0.0373941	0.115714	0.636115	3.68747	4.13412	0.071672	99.9999	96.2719
StA_LCY_69	Glass Shards, 63-125 um	LCY-1	Atitlán Caldera	Los Chocoyos	Marine Ash Layer Core M66-229	2021-12-02	2	5	5	1	Single Analysis	77.4167	0.0859145	13.1368	0.552724	0.0866426	0.0552307	0.699797	3.79646	4.1189	0.0507582	99.9999	96.1421
StA_LCY_70	Glass Shards, 63-125 um	LCY-1	Atitlán Caldera	Los Chocoyos	Marine Ash Layer Core M66-229	2021-12-02	2	5	5	1	Single Analysis	77.6857	0.0676795	13.0569	0.541436	0.0960008	0.104018	0.627962	4.01912	3.7484	0.0526859	99.9999	96.0409
StA_LCY_71	Glass Shards, 63-125 um	LCY-1	Atitlán Caldera	Los Chocoyos	Marine Ash Layer Core M66-229	2021-12-02	2	5	5	1	Single Analysis	78.7965	0.107998	12.9493	0.58235	0.0627017	0.0802121	0.598183	2.94635	3.84808	0.0283101	100	95.3722
StA_LCY_72	Glass Shards, 63-125 um	LCY-1	Atitlán Caldera	Los Chocoyos	Marine Ash Layer Core M66-229	2021-12-02	2	5	5	1	Single Analysis	78.1098	0.0771906	12.7015	0.598201	0.0274711	0.0856513	0.643847	3.77075	3.92743	0.0580758	99.9999	95.737
StA_LCY_73	Glass Shards, 63-125 um	LCY-1	Atitlán Caldera	Los Chocoyos	Marine Ash Layer Core M66-229	2021-12-02	2	5	5	1	Single Analysis	77.4085	0.108849	12.8697	0.559765	0.0585948	0.0724253	0.803118	3.91688	4.19138	0.0106632	99.9999	94.7183
StA_LCY_74	Glass Shards, 63-125 um	LCY-1	Atitlán Caldera	Los Chocoyos	Marine Ash Layer Core M66-229	2021-12-02	2	5	5	1	Single Analysis	77.6306	0.126953	13.0574	0.639421	0.0387998	0.112675	0.654113	3.80755	3.87998	0.0523539	99.9999	96.65
StA_LCY_75	Glass Shards, 63-125 um	LCY-1	Atitlán Caldera	Los Chocoyos	Marine Ash Layer Core M66-229	2021-12-02	2	5	5	1	Single Analysis	78.195	0.09537	12.7299	0.455668	0.0537369	0.0884833	0.566481	3.31812	4.49721		100	95.8373
StA_LCY_76	Glass Shards, 63-125 um	LCY-1	Atitlán Caldera	Los Chocoyos	Marine Ash Layer Core M66-229	2021-12-02	2	5	5	1	Single Analysis	77.9353	0.0360917	12.7725	0.52515	0.0852888	0.0647987	0.566131	3.99401	3.96281	0.057934	100	96.1439
StA_LCY_77	Glass Shards, 63-125 um	LCY-1	Atitlán Caldera	Los Chocoyos	Marine Ash Layer Core M66-229	2021-12-02	2	5	5	1	Single Analysis	77.7731	0.088681	12.7761	0.558175	0.0506749	0.0902915	0.639019	3.68252	4.30522	0.036181	99.9999	93.1428
StA_LCY_78	Glass Shards, 63-125 um	LCY-1	Atitlán Caldera	Los Chocoyos	Marine Ash Layer Core M66-229	2021-12-02	2	5	5	1	Single Analysis	77.868	0.0982223	12.9641	0.557289	0.0347588	0.0820433	0.619082	3.78902	3.97691	0.0105425	100	95.8031
StA_LCY_79	Glass Shards, 63-125 um	LCY-1	Atitlán Caldera	Los Chocoyos	Marine Ash Layer Core M66-229	2021-12-02	2	5	5	1	Single Analysis	78.5889	0.0958705	12.7273	0.518761	0.0773619	0.119266	0.638547	3.265	3.94088	0.0280749	99.9999	96.1714
StA_LCY_80	Glass Shards, 63-125 um	LCY-1	Atitlán Caldera	Los Chocoyos	Marine Ash Layer Core M66-229	2021-12-02	2	5	5	1	Single Analysis	78.0909	0.0840398	12.8315	0.450101	0.0538232	0.0918038	0.614088	3.63018	4.1233	0.0301116	99.9999	95.312
StA_LCY_81	Glass Shards, 63-125 um	LCY-1	Atitlán Caldera	Los Chocoyos	Marine Ash Layer Core M66-229	2021-12-02	2	5	5	1	Single Analysis	77.8583	0.0809776	12.9936	0.492889	0.105354	0.071785	0.622412	3.92493	3.81132	0.0383198	99.9999	96.8169
StA_LCY_82	Glass Shards, 63-125 um	LCY-1	Atitlán Caldera	Los Chocoyos	Marine Ash Layer Core M66-229	2021-12-02	2	5	5	1	Single Analysis	78.0397	0.101782	12.8889	0.584727	0.0662621	0.0636656	0.652235	3.65584	3.92587	0.0209795	100	96.2843
StA_LCY_83	Glass Shards, 63-125 um	LCY-1	Atitlán Caldera	Los Chocoyos	Marine Ash Layer Core M66-229	2021-12-02	2	5	5	1	Single Analysis	77.7169	0.124496	12.9046	0.851825	0.0501499	0.195533	1.01592	4.09472	2.99866	0.0471513	99.9999	96.71
StA_LCY_84	Glass Shards, 63-125 um	LCY-1	Atitlán Caldera	Los Chocoyos	Marine Ash Layer Core M66-229	2021-12-02	2	5	5	1	Single Analysis	78.0785	0.102267	12.7576	0.511024	0.029219	0.106382	0.653827	3.87872	3.85814	0.0242806	100	97.197
StA_LCY_85	Glass Shards, 63-125 um	LCY-1	Atitlán Caldera	Los Chocoyos	Marine Ash Layer Core M66-229	2021-12-02	2	5	5	1	Single Analysis	77.7699	0.094339	12.8143	0.54856	0.13844	0.0963153	0.68492	3.76524	4.06688	0.0210105	99.9999	96.1426
StA_LCY_86	Glass Shards, 63-125 um	LCY-1	Atitlán Caldera	Los Chocoyos	Marine Ash Layer Core M66-229	2021-12-02	2	5	5	1	Single Analysis	78.0018	0.122611	12.685	0.507089	0.0911831	0.0989367	0.55847	3.98021	3.92852	0.0260523	99.9999	96.7285
StA_LCY_87	Glass Shards, 63-125 um	LCY-1	Atitlán Caldera	Los Chocoyos	Lacustrine Ash Layer Petén Itzá, Site P1	2021-12-02	2	5	5	1	Single Analysis	77.9491	0.113656	12.9754	0.512685	0.100777	0.0673992	0.671738	3.71339	3.89584		100	93.1762
StA_LCY_88	Glass Shards, 63-125 um	LCY-1	Atitlán Caldera	Los Chocoyos	Lacustrine Ash Layer Petén Itzá, Site P1	2021-12-02	2	5	5	1	Single Analysis	77.6751	0.0955727	13.1767	0.511435	0.0546579	0.0956776	0.658938	3.7138	4.01804		99.9999	95.3201
StA_LCY_89	Glass Shards, 63-125 um	LCY-1	Atitlán Caldera	Los Chocoyos	Lacustrine Ash Layer Petén Itzá, Site P1	2021-12-02	2	5	5	1	Single Analysis	77.8607	0.0766084	12.8172	0.547308	0.0196783	0.102706	0.644542	3.2306	4.67227	0.0283072	99.9999	95.0287
StA_LCY_90	Glass Shards, 63-125 um	LCY-1	Atitlán Caldera	Los Chocoyos	Lacustrine Ash Layer Petén Itzá, Site P1	2021-12-02	2	5	5	1	Single Analysis	77.8521	0.097013	12.907	0.557273	0.0744152	0.0655862	0.626538	3.7628	4.0571		99.9999	95.1419
StA_LCY_91	Glass Shards, 63-125 um	LCY-1	Atitlán Caldera	Los Chocoyos	Lacustrine Ash Layer Petén Itzá, Site P1	2021-12-02	2	5	5	1	Single Analysis	77.9684	0.0971354	12.7191	0.472261	0.0945355	0.112839	0.608188	3.94158	3.89998	0.0860075	100	96.1544
StA_LCY_92	Glass Shards, 63-125 um	LCY-1	Atitlán Caldera	Los Chocoyos	Lacustrine Ash Layer Petén Itzá, Site P1	2021-12-02	2	5	5	1	Single Analysis	78.1988	0.0786515	12.7822	0.502759	0.10887	0.102026	0.540032	3.81149	3.84308	0.0320081	99.9999	94.9759
StA_LCY_93	Glass Shards, 63-125 um	LCY-1	Atitlán Caldera	Los Chocoyos	Lacustrine Ash Layer Petén Itzá, Site P1	2021-12-02	2	5	5	1	Single Analysis	77.968	0.0809182	13.086	0.618687	0.0408805	0.0931402	0.645449	3.58231	3.86679	0.0177008	99.9999	94.9107
StA_LCY_94	Glass Shards, 63-125 um	LCY-1	Atitlán Caldera	Los Chocoyos	Lacustrine Ash Layer Petén Itzá, Site P1	2021-12-02	2	5	5	1	Single Analysis	77.8545	0.0979535	12.8557	0.600746	0.0609959	0.110131	0.580838	4.08757	3.66399	0.0875757	100	94.4326
StA_LCY_95	Glass Shards, 63-125 um	LCY-1	Atitlán Caldera	Los Chocoyos	Lacustrine Ash Layer Petén Itzá, Site P1	2021-12-02	2	5	5	1	Single Analysis	77.9567	0.093189	12.611	0.643035	0.0922602	0.0800826	0.659856	3.79773	4.06605		99.9999	96.8999
StA_LCY_96	Glass Shards, 63-125 um	LCY-1	Atitlán Caldera	Los Chocoyos	Lacustrine Ash Layer Petén Itzá, Site P1	2021-12-02	2	5	5	1	Single Analysis	77.9947	0.0983127	12.7338	0.524438	0.048272	0.0810429	0.581553	3.85968	4.07815		100	96.1219
StA_LCY_97	Glass Shards, 63-125 um	LCY-1	Atitlán Caldera	Los Chocoyos	Lacustrine Ash Layer Petén Itzá, Site P1	2021-12-02	2	5	5	1	Single Analysis	78.0111	0.0921035	12.5642	0.47303	0.081129	0.10954	0.55898	3.65132	4.4103	0.0483082	100	97.499
StA_LCY_98	Glass Shards, 63-125 um	LCY-1	Atitlán Caldera	Los Chocoyos	Lacustrine Ash Layer Petén Itzá, Site P1	2021-12-02	2	5	5	1	Single Analysis	77.7381	0.111851	12.9739	0.605975	0.0547155	0.0887023	0.67479	3.83009	3.87218	0.0496649	100	95.037
StA_LCY_99	Glass Shards, 63-125 um	LCY-1	Atitlán Caldera	Los Chocoyos	Lacustrine Ash Layer Petén Itzá, Site P1	2021-12-02	2	5	5	1	Single Analysis	77.4725	0.10046	13.2473	0.463235	0.0707646	0.105199	0.645833	3.73831	4.12794	0.0283269	99.9999	94.9627
StA_LCY_100	Glass Shards, 63-125 um	LCY-1	Atitlán Caldera	Los Chocoyos	Lacustrine Ash Layer Petén Itzá, Site P1	2021-12-02	2	5	5	1	Single Analysis	77.9462	0.0951983	12.6896	0.582414	0.0533152	0.0803366	0.619101	3.9077	3.98045	0.0455206	99.9999	96.2202
StA_LCY_101	Glass Shards, 63-125 um	LCY-1	Atitlán Caldera	Los Chocoyos	Lacustrine Ash Layer Petén Itzá, Site P1	2021-12-02	2	5	5	1	Single Analysis	77.8388	0.1133	12.8961	0.533815	0.0684217	0.0722054	0.590781	3.86777	3.99389	0.0248042	99.9999	95.1453
StA_LCY_102	Glass Shards, 63-125 um	LCY-1	Atitlán Caldera	Los Chocoyos	Lacustrine Ash Layer Petén Itzá, Site P1	2021-12-02	2	5	5	1	Single Analysis	78.0551	0.0854701	12.5661	0.557788	0.0951283	0.0493296	0.594448	3.39596	4.60064		99.9999	96.291
StA_LCY_103	Glass Shards, 63-125 um	LCY-1	Atitlán Caldera	Los Chocoyos	Lacustrine Ash Layer Petén Itzá, Site P1	2021-12-02	2	5	5	1	Single Analysis	78.2679	0.0919016	12.5045	0.549632	0.103089	0.0689	0.666626	3.66979	4.07754		99.9999	95.6458
StA_LCY_104	Glass Shards, 63-125 um	LCY-1	Atitlán Caldera	Los Chocoyos	Lacustrine Ash Layer Petén Itzá, Site P1	2021-12-02	2	5	5	1	Single Analysis	77.867	0.075678	12.8944	0.537877	0.0303337	0.0755737	0.644514	3.64839	4.13831	0.0877698	99.9999	95.9328
StA_LCY_105	Glass Shards, 63-125 um	LCY-1	Atitlán Caldera	Los Chocoyos	Lacustrine Ash Layer Petén Itzá, Site P1	2021-12-02	2	5	5	1	Single Analysis	77.5489	0.0670773	13.1736	0.577096	0.0904176	0.086107	0.678027	3.83749	3.90057	0.0406879	100	95.1142
StA_LCY_106	Glass Shards, 63-125 um	LCY-1	Atitlán Caldera	Los Chocoyos	Lacustrine Ash Layer Petén Itzá, Site P1	2021-12-02	2	5	5	1	Single Analysis	77.9582	0.0683545	12.9788	0.543536	0.0376908	0.0618598	0.543323	3.87555	3.90749	0.0251272	100	93.9221
StA_LCY_107	Glass Shards, 63-125 um	LCY-1	Atitlán Caldera	Los Chocoyos	Terrestrial Surge Deposit	2021-12-02	2	5	5	1	Single Analysis	77.8508	0.0767064	12.8669	0.477662	0.111451	0.0949551	0.613651	3.89718	4.01059		99.9999	96.9932
StA_LCY_108	Glass Shards, 63-125 um	LCY-1	Atitlán Caldera	Los Chocoyos	Terrestrial Surge Deposit	2021-12-02	2	5	5	1	Single Analysis	78.0096	0.0955832	12.7272	0.552166	0.0487754	0.108631	0.634287	3.73841	4.08015	0.00517785	99.9999	96.5651
StA_LCY_109	Glass Shards, 63-125 um	LCY-1	Atitlán Caldera	Los Chocoyos	Terrestrial Surge Deposit	2021-12-02	2	5	5	1	Single Analysis	78.3455	0.0744598	12.6236	0.499043		0.0772063	0.593237	3.66196	4.09936	0.0256337	100	98.3081
StA_LCY_110	Glass Shards, 63-125 um	LCY-1	Atitlán Caldera	Los Chocoyos	Terrestrial Surge Deposit	2021-12-02	2	5	5	1	Single Analysis	77.6512	0.0902318	12.9021	0.670101	0.031633	0.101744	0.891636	3.51593	4.12785	0.0174241	99.9999	96.4183
StA_LCY_111	Glass Shards, 63-125 um	LCY-1	Atitlán Caldera	Los Chocoyos	Terrestrial Surge Deposit	2021-12-02	2	5	5	1	Single Analysis	77.5036	0.123308	12.8529	0.548675	0.0920897	0.111614	0.684199	3.8945	4.14508	0.0439566	99.9999	95.7762
StA_LCY_112	Glass Shards, 63-125 um	LCY-1	Atitlán Caldera	Los Chocoyos	Terrestrial Surge Deposit	2021-12-02	2	5	5	1	Single Analysis	77.7792	0.128596	12.787	0.750229	0.058236	0.182272	0.930636	3.39883	3.93766	0.0471484	99.9999	96.5039
StA_LCY_113	Glass Shards, 63-125 um	LCY-1	Atitlán Caldera	Los Chocoyos	Terrestrial Surge Deposit	2021-12-02	2	5	5	1	Single Analysis	77.9565	0.082296	12.6915	0.546564	0.0744339	0.0692266	0.585976	3.90038	4.06375	0.0292018	99.9999	97.9392
StA_LCY_114	Glass Shards, 63-125 um	LCY-1	Atitlán Caldera	Los Chocoyos	Terrestrial Surge Deposit	2021-12-02	2	5	5	1	Single Analysis	78.0352	0.0708365	12.9536	0.45034	0.0980411	0.116143	0.592118	3.56798	4.11207	0.00355752	99.9999	95.5722
StA_LCY_115	Glass Shards, 63-125 um	LCY-1	Atitlán Caldera	Los Chocoyos	Terrestrial Surge Deposit	2021-12-02	2	5	5	1	Single Analysis	77.4931	0.124014	13.1881	0.546365	0.068218	0.0983415	0.688598	3.83014	3.95437	0.00869546	100	96.6021
StA_LCY_116	Glass Shards, 63-125 um	LCY-1	Atitlán Caldera	Los Chocoyos	Terrestrial Surge Deposit	2021-12-02	2	5	5	1	Single Analysis	77.4692	0.111059	13.2538	0.548906	0.0479861	0.0983819	0.633563	3.79278	4.04424		99.9999	95.4444
StA_LCY_117	Glass Shards, 63-125 um	LCY-1	Atitlán Caldera	Los Chocoyos	Terrestrial Surge Deposit	2021-12-02	2	5	5	1	Single Analysis	78.1906	0.0783451	12.982	0.477689	0.0700061	0.102641	0.583213	3.38706	4.1283		99.9999	97.1344
StA_LCY_118	Glass Shards, 63-125 um	LCY-1	Atitlán Caldera	Los Chocoyos	Terrestrial Surge Deposit	2021-12-02	2	5	5	1	Single Analysis	77.8678	0.1148	12.7625	0.519808	0.0431277	0.0713625	0.604926	3.79566	4.19901	0.0208916	99.9999	96.6895
StA_LCY_119	Glass Shards, 63-125 um	LCY-1	Atitlán Caldera	Los Chocoyos	Terrestrial Surge Deposit	2021-12-02	2	5	5	1	Single Analysis	77.949	0.0677951	12.5714	0.64894	0.098555	0.106168	0.583409	3.81669	4.15618	0.00174889	99.9999	97.2046
StA_LCY_120	Glass Shards, 63-125 um	LCY-1	Atitlán Caldera	Los Chocoyos	Terrestrial Surge Deposit	2021-12-02	2	5	5	1	Single Analysis	77.8085	0.0712773	12.9785	0.578592	0.0472042	0.066986	0.645473	3.55863	4.19709	0.0476229	99.9999	95.5423
StA_LCY_121	Glass Shards, 63-125 um	LCY-1	Atitlán Caldera	Los Chocoyos	Terrestrial Surge Deposit	2021-12-02	2	5	5	1	Single Analysis	77.8696	0.0986122	12.8083	0.535515	0.0499759	0.0691419	0.640825	3.74046	4.14233	0.0451329	99.9999	97.0468
StA_LCY_122	Glass Shards, 63-125 um	LCY-1	Atitlán Caldera	Los Chocoyos	Terrestrial Surge Deposit	2021-12-02	2	5	5	1	Single Analysis	78.1148	0.11087	12.6974	0.498502	0.0558479	0.108599	0.595539	3.64405	4.13956	0.0347888	99.9999	96.8703
StA_LCY_123	Glass Shards, 63-125 um	LCY-1	Atitlán Caldera	Los Chocoyos	Terrestrial Surge Deposit	2021-12-02	2	5	5	1	Single Analysis	77.5884	0.0834217	12.9985	0.518908	0.0960175	0.0897196	0.592315	3.882	4.12979	0.0208554	99.9999	96.8573
StA_LCY_124	Glass Shards, 63-125 um	LCY-1	Atitlán Caldera	Los Chocoyos	Terrestrial Surge Deposit	2021-12-02	2	5	5	1	Single Analysis	77.6	0.0858935	12.9758	0.578302	0.0658993	0.103745	0.558308	3.89683	4.11105	0.0240747	99.9999	98.0284
StA_LCY_125	Glass Shards, 63-125 um	LCY-1	Atitlán Caldera	Los Chocoyos	Terrestrial Surge Deposit	2021-12-02	2	5	5	1	Single Analysis	77.9301	0.0838036	12.8761	0.520225	0.0515874	0.0834929	0.588594	3.74993	4.11249	0.00352203	99.9999	96.5352
StA_LCY_126	Glass Shards, 63-125 um	LCY-1	Atitlán Caldera	Los Chocoyos	Terrestrial Surge Deposit	2021-12-02	2	5	5	1	Single Analysis	78.0338	0.0648827	12.8328	0.547499	0.105332	0.0805901	0.636405	3.56239	4.08597	0.050202	99.9999	97.4065
StA_LCY_127	Glass Shards, 63-125 um	LCY-1	Atitlán Caldera	Los Chocoyos	Terrestrial Surge Deposit	2021-12-02	2	5	5	1	Single Analysis	77.8947	0.0824034	12.8206	0.594715	0.0461091	0.0613425	0.586536	3.75212	4.12017	0.0413039	100	97.8115
StA_LCY_128	Glass Shards, 63-125 um	LCY-1	Atitlán Caldera	Los Chocoyos	Terrestrial Surge Deposit	2021-12-02	2	5	5	1	Single Analysis	78.0073	0.109954	12.7559	0.518779	0.101923	0.117881	0.570667	3.66512	4.149	0.00350039	100	97.1319
StA_LCY_129	Glass Shards, 63-125 um	LCY-1	Atitlán Caldera	Los Chocoyos	Terrestrial Surge Deposit	2021-12-02	2	5	5	1	Single Analysis	78.1774	0.0950228	12.7149	0.532378	0.122247	0.0551779	0.59444	3.55684	4.14095	0.0105349	99.9999	95.8717
StA_LCY_130	Glass Shards, 63-125 um	LCY-1	Atitlán Caldera	Los Chocoyos	Terrestrial Surge Deposit	2021-12-02	2	5	5	1	Single Analysis	77.6201	0.0676086	13.0855	0.558212	0.0678163	0.114862	0.651369	3.85296	3.94643	0.0349986	99.9999	96.2895
StA_LCY_131	Glass Shards, 63-125 um	LCY-1	Atitlán Caldera	Los Chocoyos	Terrestrial Surge Deposit	2021-12-02	2	5	5	1	Single Analysis	78.3243	0.0861179	12.902	0.486393	0.0655587	0.0643	0.591812	3.43003	4.00695	0.042482	99.9999	95.3344
StA_LCY_132	Glass Shards, 63-125 um	LCY-1	Atitlán Caldera	Los Chocoyos	Terrestrial Surge Deposit	2021-12-02	2	5	5	1	Single Analysis	78.0536	0.10595	12.8096	0.472044	0.0289049	0.0879624	0.64173	3.78467	3.99262	0.0227704	99.9999	96.1775
StA_LCY_133	Glass Shards, 63-125 um	LCY-1	Atitlán Caldera	Los Chocoyos	Terrestrial Surge Deposit	2021-12-02	2	5	5	1	Single Analysis	77.6912	0.105238	12.9988	0.560508	0.0923435	0.0788247	0.659195	3.66046	4.09722	0.0560508	99.9999	96.1627
StA_LCY_134	Glass Shards, 63-125 um	LCY-1	Atitlán Caldera	Los Chocoyos	Terrestrial Surge Deposit	2021-12-02	2	5	5	1	Single Analysis	77.941	0.0703884	12.8754	0.52632	0.049837	0.0666891	0.558072	3.87393	4.03834		100	97.3172
StA_LCY_135	Glass Shards, 63-125 um	LCY-1	Atitlán Caldera	Los Chocoyos	Terrestrial Surge Deposit	2021-12-02	2	5	5	1	Single Analysis	77.7558	0.103702	13.0565	0.581815	0.0924573	0.0922491	0.685101	3.77951	3.81074	0.042168	100	96.0443
StA_LCY_136	Glass Shards, 63-125 um	LCY-1	Atitlán Caldera	Los Chocoyos	Terrestrial Surge Deposit	2021-12-02	2	5	5	1	Single Analysis	77.6545	0.12711	12.7836	0.709622	0.0755204	0.18792	0.962911	3.70868	3.75012	0.0400911	100	96.5302
StA_LCY_137	Glass Shards, 63-125 um	LCY-1	Atitlán Caldera	Los Chocoyos	Terrestrial Surge Deposit	2021-12-02	2	5	5	1	Single Analysis	77.777	0.0907761	12.8539	0.545383	0.0489672	0.0743845	0.62122	3.84891	4.13939		99.9999	96.391
StA_LCY_138	Glass Shards, 63-125 um	LCY-1	Atitlán Caldera	Los Chocoyos	Terrestrial Surge Deposit	2021-12-02	2	5	5	1	Single Analysis	77.591	0.136762	12.8632	0.636267	0.0249032	0.0947763	0.725383	3.931	3.95158	0.0449699	99.9999	97.1762
StA_LCY_139	Glass Shards, 63-125 um	LCY-1	Atitlán Caldera	Los Chocoyos	Terrestrial Surge Deposit	2021-12-02	2	5	5	1	Single Analysis	76.2575	0.1887	13.406	1.11395	0.0718511	0.261069	1.33375	4.15762	3.15191	0.0575431	99.9999	96.4495
StA_LCY_140	Glass Shards, 63-125 um	LCY-1	Atitlán Caldera	Los Chocoyos	Terrestrial Surge Deposit	2021-12-02	2	5	5	1	Single Analysis	77.8559	0.102333	12.9448	0.613165	0.0671136	0.0723082	0.628125	3.65696	4.02058	0.0385436	99.9999	96.2547
StA_LCY_141	Glass Shards, 63-125 um	LCY-1	Atitlán Caldera	Los Chocoyos	Terrestrial Surge Deposit	2021-12-02	2	5	5	1	Single Analysis	77.6	0.0844801	13.0382	0.570318	0.0944857	0.118726	0.657583	3.73404	4.08475	0.0173293	99.9999	96.9459
StA_LCY_142	Glass Shards, 63-125 um	LCY-1	Atitlán Caldera	Los Chocoyos	Terrestrial Surge Deposit	2021-12-02	2	5	5	1	Single Analysis	77.6177	0.0780677	13.0287	0.560497	0.0392431	0.102346	0.612612	3.73595	4.18594	0.0388245	99.9999	95.5581
StA_LCY_143	Glass Shards, 63-125 um	LCY-1	Atitlán Caldera	Los Chocoyos	Terrestrial Surge Deposit	2021-12-02	2	5	5	1	Single Analysis	77.806	0.110842	12.8268	0.536373	0.0544415	0.112801	0.75352	3.82534	3.90783	0.0659897	99.9999	96.9848
StA_LCY_144	Glass Shards, 63-125 um	LCY-1	Atitlán Caldera	Los Chocoyos	Terrestrial Surge Deposit	2021-12-02	2	5	5	1	Single Analysis	77.7077	0.0878967	12.9461	0.527173	0.105828	0.120651	0.772102	3.74183	3.99059		99.9999	96.4769
StA_LCY_145	Glass Shards, 63-125 um	LCY-1	Atitlán Caldera	Los Chocoyos	Terrestrial Surge Deposit	2021-12-02	2	5	5	1	Single Analysis	78.0454	0.106653	12.6715	0.516583	0.0767659	0.0719553	0.644936	3.87924	3.96112	0.0258957	100	97.6996
StA_LCY_146	Glass Shards, 63-125 um	LCY-1	Atitlán Caldera	Los Chocoyos	Terrestrial Surge Deposit	2021-12-02	2	5	5	1	Single Analysis	77.8406	0.0910084	12.9892	0.569171	0.0875405	0.0716718	0.582727	3.57308	4.19311	0.00178654	99.9999	95.156
StA_LCY_147	Glass Shards, 63-125 um	LCY-1	Atitlán Caldera	Los Chocoyos	Terrestrial Surge Deposit	2021-12-02	2	5	5	1	Single Analysis	78.0479	0.103485	12.7756	0.515155	0.0967723	0.0878903	0.586004	3.72837	4.05886		100	96.8252
StA_LCY_148	Glass Shards, 63-125 um	LCY-1	Atitlán Caldera	Los Chocoyos	Terrestrial Surge Deposit	2021-12-02	2	5	5	1	Single Analysis	78.068	0.0776036	12.6622	0.573462	0.0617114	0.0868913	0.658083	3.79762	4.01434		99.9999	96.9027
StA_LCY_149	Glass Shards, 63-125 um	LCY-1	Atitlán Caldera	Los Chocoyos	Terrestrial Surge Deposit	2021-12-02	2	5	5	1	Single Analysis	78.0289	0.0880405	12.8913	0.527211	0.067398	0.0655401	0.618038	3.64341	4.05626	0.0139337	100	96.8872
StA_LCY_150	Glass Shards, 63-125 um	LCY-3	Atitlán Caldera	Los Chocoyos	Terrestrial Ignimbrite Deposit	2021-12-02	2	5	5	1	Single Analysis	76.3276	0.188464	13.4822	1.05401	0.0298922	0.266164	1.35375	3.8389	3.40894	0.0500593	100	97.6842
StA_LCY_151	Glass Shards, 63-125 um	LCY-3	Atitlán Caldera	Los Chocoyos	Terrestrial Ignimbrite Deposit	2021-12-02	2	5	5	1	Single Analysis	75.7863	0.235053	13.6762	1.07347	0.078076	0.278475	1.32399	3.98115	3.52734	0.0399147	100	96.9568
StA_LCY_152	Glass Shards, 63-125 um	LCY-3	Atitlán Caldera	Los Chocoyos	Terrestrial Ignimbrite Deposit	2021-12-02	2	5	5	1	Single Analysis	75.4884	0.18921	13.7738	1.12352	0.0585748	0.270432	1.406	4.07656	3.60302	0.0103973	99.9999	97.1408
StA_LCY_153	Glass Shards, 63-125 um	LCY-3	Atitlán Caldera	Los Chocoyos	Terrestrial Ignimbrite Deposit	2021-12-02	2	5	5	1	Single Analysis	77.0483	0.224772	13.6169	1.08427	0.0604158	0.300007	1.30521	2.80835	3.48194	0.0698461	100	96.4979
StA_LCY_154	Glass Shards, 63-125 um	LCY-3	Atitlán Caldera	Los Chocoyos	Terrestrial Ignimbrite Deposit	2021-12-02	2	5	5	1	Single Analysis	75.8397	0.205725	13.6705	1.12548	0.0506351	0.280804	1.35308	3.85156	3.59479	0.0276285	99.9999	97.3632
StA_LCY_155	Glass Shards, 63-125 um	LCY-3	Atitlán Caldera	Los Chocoyos	Terrestrial Ignimbrite Deposit	2021-12-02	2	5	5	1	Single Analysis	75.5286	0.1662	13.9447	1.09151	0.0409044	0.28881	1.37929	3.9355	3.56364	0.0608402	100	96.811
StA_LCY_156	Glass Shards, 63-125 um	LCY-3	Atitlán Caldera	Los Chocoyos	Terrestrial Ignimbrite Deposit	2021-12-02	2	5	5	1	Single Analysis	76.4185	0.176602	13.3374	1.02284	0.122515	0.291845	1.3365	3.65702	3.62629	0.0104486	99.9999	97.6204
StA_LCY_157	Glass Shards, 63-125 um	LCY-3	Atitlán Caldera	Los Chocoyos	Terrestrial Ignimbrite Deposit	2021-12-02	2	5	5	1	Single Analysis	75.9795	0.209641	13.6389	1.03022	0.0228848	0.300158	1.33774	4.07635	3.3612	0.0433176	99.9999	97.8817
StA_LCY_158	Glass Shards, 63-125 um	LCY-3	Atitlán Caldera	Los Chocoyos	Terrestrial Ignimbrite Deposit	2021-12-02	2	5	5	1	Single Analysis	77.7365	0.0896999	12.8749	0.599933	0.0774775	0.0545865	0.663635	3.88424	4.01889		99.9999	96.5441
StA_LCY_159	Glass Shards, 63-125 um	LCY-3	Atitlán Caldera	Los Chocoyos	Terrestrial Ignimbrite Deposit	2021-12-02	2	5	5	1	Single Analysis	77.912	0.0949589	12.7721	0.584002	0.107752	0.0749894	0.625085	3.70267	4.0875	0.0387948	99.9999	96.1469
StA_LCY_160	Glass Shards, 63-125 um	LCY-3	Atitlán Caldera	Los Chocoyos	Terrestrial Ignimbrite Deposit	2021-12-02	2	5	5	1	Single Analysis	75.8199	0.189421	13.8498	1.08365	0.0774112	0.283875	1.38601	3.82949	3.48042		100	97.4019
StA_LCY_161	Glass Shards, 63-125 um	LCY-3	Atitlán Caldera	Los Chocoyos	Terrestrial Ignimbrite Deposit	2021-12-02	2	5	5	1	Single Analysis	76.3032	0.185902	13.5136	1.08284	0.081904	0.272842	1.40963	3.60706	3.49402	0.0488135	99.9999	97.3091
StA_LCY_162	Glass Shards, 63-125 um	LCY-3	Atitlán Caldera	Los Chocoyos	Terrestrial Ignimbrite Deposit	2021-12-02	2	5	5	1	Single Analysis	76.0153	0.176125	13.8303	1.00316	0.0533838	0.268362	1.33892	3.80283	3.47304	0.0384405	99.9999	97.0331
StA_LCY_163	Glass Shards, 63-125 um	LCY-3	Atitlán Caldera	Los Chocoyos	Terrestrial Ignimbrite Deposit	2021-12-02	2	5	5	1	Single Analysis	75.9194	0.195242	13.6899	1.04456	0.0211495	0.305574	1.36451	3.68814	3.77149		99.9999	95.9834
StA_LCY_164	Glass Shards, 63-125 um	LCY-3	Atitlán Caldera	Los Chocoyos	Terrestrial Ignimbrite Deposit	2021-12-02	2	5	5	1	Single Analysis	76.3676	0.184176	13.5069	0.938175	0.0215164	0.24471	1.24095	3.81941	3.61351	0.0629019	99.9999	97.1354
StA_LCY_165	Glass Shards, 63-125 um	LCY-3	Atitlán Caldera	Los Chocoyos	Terrestrial Ignimbrite Deposit	2021-12-02	2	5	5	1	Single Analysis	76.3456	0.19936	13.4387	0.888753	0.0260304	0.244603	1.30596	3.90456	3.64633		99.9999	96.8098
StA_LCY_166	Glass Shards, 63-125 um	LCY-3	Atitlán Caldera	Los Chocoyos	Terrestrial Ignimbrite Deposit	2021-12-02	2	5	5	1	Single Analysis	76.0794	0.188939	13.8433	1.00903	0.0486823	0.219499	1.24837	3.76376	3.52786	0.070986	99.9999	93.2578
StA_LCY_167	Glass Shards, 63-125 um	LCY-3	Atitlán Caldera	Los Chocoyos	Terrestrial Ignimbrite Deposit	2021-12-02	2	5	5	1	Single Analysis	75.9629	0.216594	13.5165	1.02748	0.068719	0.236951	1.40032	3.8958	3.61679	0.0578686	99.9999	96.7709
StA_LCY_168	Glass Shards, 63-125 um	LCY-3	Atitlán Caldera	Los Chocoyos	Terrestrial Ignimbrite Deposit	2021-12-02	2	5	5	1	Single Analysis	75.779	0.199174	13.8183	1.10485	0.044066	0.29453	1.38029	3.72548	3.60164	0.0525283	99.9999	96.9002
StA_LCY_169	Glass Shards, 63-125 um	LCY-3	Atitlán Caldera	Los Chocoyos	Terrestrial Ignimbrite Deposit	2021-12-02	2	5	5	1	Single Analysis	76.458	0.190121	13.2788	1.0621	0.0229333	0.271309	1.36156	3.8188	3.49118	0.0451499	99.9999	97.6746
StA_LCY_170	Glass Shards, 63-125 um	LCY-3	Atitlán Caldera	Los Chocoyos	Terrestrial Ignimbrite Deposit	2021-12-02	2	5	5	1	Single Analysis	75.8529	0.240497	13.5536	1.17355	0.083825	0.293336	1.38101	3.8578	3.46791	0.0956241	100	97.465
StA_LCY_171	Glass Shards, 63-125 um	LCY-2	Atitlán Caldera	Los Chocoyos	Terrestrial Initial tephra fall deposit	2022-02-28	4	3	1	1	Single Analysis	78.0841	0.133282	12.5763	0.399303	0.147559	0.0455536	0.656059	1.66739	6.16827	0.12391	100.002	91.76
StA_LCY_172	Glass Shards, 63-125 um	LCY-2	Atitlán Caldera	Los Chocoyos	Terrestrial Initial tephra fall deposit	2022-02-28	4	3	1	1	Single Analysis	78.601	0.108141	12.4509	0.588826	0.0451768	0.0482322	0.616216	1.41947	6.12178		99.9998	91.64
StA_LCY_173	Glass Shards, 63-125 um	LCY-2	Atitlán Caldera	Los Chocoyos	Terrestrial Initial tephra fall deposit	2022-02-28	4	3	1	1	Single Analysis	77.6461	0.051757	12.4047	0.68967	0.0118544	0.0729255	0.727561	3.47163	4.70999	0.204382	99.9906	94.48
StA_LCY_174	Glass Shards, 63-125 um	LCY-2	Atitlán Caldera	Los Chocoyos	Terrestrial Initial tephra fall deposit	2022-02-28	4	3	1	1	Single Analysis	77.2386	0.0280735	12.4817	0.647881	0.149029	0.097057	0.806617	2.83866	5.70862		99.9962	95.82
StA_LCY_175	Glass Shards, 63-125 um	LCY-2	Atitlán Caldera	Los Chocoyos	Terrestrial Initial tephra fall deposit	2022-02-28	4	3	1	1	Single Analysis	76.9902		12.7563	0.62078	0.213272	0.0524766	0.619729	3.69124	5.05837		100.002	95.09
StA_LCY_176	Glass Shards, 63-125 um	LCY-2	Atitlán Caldera	Los Chocoyos	Terrestrial Initial tephra fall deposit	2022-02-28	4	3	1	1	Single Analysis	77.4984	0.0640059	12.6964	0.597318	0.102347	0.0893568	0.63503	3.5198	4.78735		99.99	95.46
StA_LCY_177	Glass Shards, 63-125 um	LCY-2	Atitlán Caldera	Los Chocoyos	Terrestrial Initial tephra fall deposit	2022-02-28	4	3	1	1	Single Analysis	77.1557	0.11396	12.9343	0.500837	0.153516	0.0201967	0.653516	2.31268	6.11134	0.0523231	100.008	95.56
StA_LCY_178	Glass Shards, 63-125 um	LCY-2	Atitlán Caldera	Los Chocoyos	Terrestrial Initial tephra fall deposit	2022-02-28	4	3	1	1	Single Analysis	77.5629	0.0750676	12.8509	0.508422	0.0508422	0.0501144	0.630069	2.9424	5.29216	0.0456436	100.009	96.18
StA_LCY_179	Glass Shards, 63-125 um	LCY-2	Atitlán Caldera	Los Chocoyos	Terrestrial Initial tephra fall deposit	2022-02-28	4	3	1	1	Single Analysis	78.0429	0.0435374	12.2658	0.522554	0.0196756	0.0639456	0.6	3.09785	5.34799		100.004	95.55
StA_LCY_180	Glass Shards, 63-125 um	LCY-2	Atitlán Caldera	Los Chocoyos	Terrestrial Initial tephra fall deposit	2022-02-28	4	3	1	1	Single Analysis	78.6177	0.0779595	12.2493	0.555076		0.113134	0.636326	1.99527	5.69783	0.0720971	100.015	97.23
StA_LCY_181	Glass Shards, 63-125 um	LCY-2	Atitlán Caldera	Los Chocoyos	Terrestrial Initial tephra fall deposit	2022-02-28	4	3	1	1	Single Analysis	79.5682	0.0363209	11.0702	0.531614		0.0448128	0.532638	3.80602	4.40966		99.9995	97.74
StA_LCY_182	Glass Shards, 63-125 um	LCY-2	Atitlán Caldera	Los Chocoyos	Terrestrial Initial tephra fall deposit	2022-02-28	4	3	1	1	Single Analysis	77.2364	0.041974	13.0701	0.571325	0.0273247	0.0386494	0.688519	3.49091	4.78961	0.0456104	100	96.25
StA_LCY_183	Glass Shards, 63-125 um	LCY-2	Atitlán Caldera	Los Chocoyos	Terrestrial Initial tephra fall deposit	2022-02-28	4	3	1	1	Single Analysis	76.8581	0.027937	12.5612	0.593558			0.736683	3.58595	5.6291		99.9926	95.93
StA_LCY_184	Glass Shards, 63-125 um	LCY-2	Atitlán Caldera	Los Chocoyos	Terrestrial Initial tephra fall deposit	2022-03-01	5	3	1	1	Single Analysis	76.9343	0.0763311	13.1448	0.557924	0.0116473	0.132176	0.712978	3.01581	5.13727	0.28255	100.006	96.16
StA_LCY_185	Glass Shards, 63-125 um	LCY-2	Atitlán Caldera	Los Chocoyos	Terrestrial Initial tephra fall deposit	2022-03-01	5	3	1	1	Single Analysis	78.0931	0.0835035	12.5051	0.645365	0.0574724	0.0455288	0.46519	3.28706	4.81829		100.001	97.96
StA_LCY_186	Glass Shards, 63-125 um	LCY-2	Atitlán Caldera	Los Chocoyos	Terrestrial Initial tephra fall deposit	2022-03-01	5	3	1	1	Single Analysis	77.7974	0.104299	12.4805	0.879983	0.148642	0.127303	0.539919	2.12345	5.78745		99.989	96.07
StA_LCY_187	Glass Shards, 63-125 um	LCY-2	Atitlán Caldera	Los Chocoyos	Terrestrial Initial tephra fall deposit	2022-03-01	5	3	1	1	Single Analysis	78.7941	0.0811515	12.7865	0.381097	0.122542	0.058881	0.621076	0.927213	6.22488		99.9975	92.05
StA_LCY_188	Glass Shards, 63-125 um	LCY-2	Atitlán Caldera	Los Chocoyos	Terrestrial Initial tephra fall deposit	2022-03-01	5	3	1	1	Single Analysis	77.9006	0.0520612	12.7603	0.482044	0.14779	0.0453676	0.679239	1.59371	6.21547	0.120803	99.9973	94.12
StA_LCY_189	Glass Shards, 63-125 um	LCY-2	Atitlán Caldera	Los Chocoyos	Terrestrial Initial tephra fall deposit	2022-03-01	5	3	1	1	Single Analysis	77.1112	0.0603041	12.8108	0.621533	0.0886583	0.0824943	0.623074	3.2669	5.32155	0.0179782	100.004	97.34
StA_LCY_190	Glass Shards, 63-125 um	LCY-2	Atitlán Caldera	Los Chocoyos	Terrestrial Initial tephra fall deposit	2022-03-01	5	3	1	1	Single Analysis	77.4472	0.109261	12.3985	0.362713	0.0457961	0.080524	0.559504	3.57433	5.44273		100.021	98.48
StA_LCY_191	Glass Shards, 63-125 um	LCY-2	Atitlán Caldera	Los Chocoyos	Terrestrial Initial tephra fall deposit	2022-03-01	5	3	1	1	Single Analysis	78.4931	0.141793	12.3163	0.420099	0.0544401	0.0323949	0.655351	2.28731	5.53716	0.0544401	99.9923	96.62
StA_LCY_192	Glass Shards, 63-125 um	LCY-2	Atitlán Caldera	Los Chocoyos	Terrestrial Initial tephra fall deposit	2022-03-01	5	3	1	1	Single Analysis	77.1113	0.0382172	13.3083	0.472561	0.195668	0.329064	0.568052	3.04072	4.9672	0.274081	100.305	96.03
StA_LCY_193	Glass Shards, 63-125 um	LCY-2	Atitlán Caldera	Los Chocoyos	Terrestrial Initial tephra fall deposit	2022-03-01	5	3	1	1	Single Analysis	76.9509	0.0392258	13.0304	0.441213		0.0576485	0.618816	3.32229	5.50611	0.0362244	100.003	96.62
StA_LCY_194	Glass Shards, 63-125 um	LCY-2	Atitlán Caldera	Los Chocoyos	Terrestrial Initial tephra fall deposit	2022-03-01	5	3	1	1	Single Analysis	77.8703	0.082446	12.9889	0.507749	0.0752768	0.116183	0.618872	3.2156	4.53347		100.009	94.85
StA_LCY_195	Glass Shards, 63-125 um	LCY-2	Atitlán Caldera	Los Chocoyos	Terrestrial Initial tephra fall deposit	2022-03-01	5	3	1	1	Single Analysis	77.7838	0.101248	12.768	0.607711	0.0505119	0.108864	0.626639	1.5568	6.17119	0.22512	99.9999	89.2859
StA_LCY_196	Glass Shards, 63-125 um	LCY-2	Atitlán Caldera	Los Chocoyos	Terrestrial Initial tephra fall deposit	2022-03-01	5	3	1	1	Single Analysis	78.2889	0.0206051	12.4159	0.552534		0.0211335	0.65873	3.21228	4.60709	0.222852	100	94.6367
StA_LCY_197	Glass Shards, 63-125 um	LCY-2	Atitlán Caldera	Los Chocoyos	Terrestrial Initial tephra fall deposit	2022-03-01	5	3	1	1	Single Analysis	76.9512	0.0864689	13.0933	0.492996	0.0808341	0.0818586	0.627822	2.65349	5.86022	0.0717159	99.9999	97.6073
StA_LCY_198	Glass Shards, 63-125 um	LCY-2	Atitlán Caldera	Los Chocoyos	Terrestrial Initial tephra fall deposit	2022-03-01	5	3	1	1	Single Analysis	77.6725	0.0948893	12.8246	0.405766	0.0933355	0.0510704	0.642989	3.11809	5.09668		99.9999	96.5335
StA_LCY_199	Glass Shards, 63-125 um	LCY-2	Atitlán Caldera	Los Chocoyos	Terrestrial Initial tephra fall deposit	2022-03-01	5	3	1	1	Single Analysis	78.2359	0.104423	12.6664	0.503807	0.107	0.0825891	0.598195	1.6766	5.76361	0.261464	100	73.7385
StA_LCY_200	Glass Shards, 63-125 um	LCY-2	Atitlán Caldera	Los Chocoyos	Terrestrial Initial tephra fall deposit	2022-03-01	5	3	1	1	Single Analysis	77.9834	0.0931268	12.6607	0.629945	0.00772623	0.0447091	0.634993	2.43119	5.38776	0.126298	99.9999	97.0719
StA_LCY_201	Glass Shards, 63-125 um	LCY-2	Atitlán Caldera	Los Chocoyos	Terrestrial Initial tephra fall deposit	2022-03-01	5	3	1	1	Single Analysis	77.769	0.125752	12.5967	0.471893	0.100645	0.0581551	0.712453	3.68029	4.48502		99.9999	93.1991
StA_LCY_202	Glass Shards, 63-125 um	LCY-2	Atitlán Caldera	Los Chocoyos	Terrestrial Initial tephra fall deposit	2022-03-01	5	3	1	1	Single Analysis	76.9471	0.103205	13.6427	0.478579	0.0300254	0.132888	0.847789	2.45455	5.18309	0.179924	99.9999	87.5926
StA_LCY_203	Glass Shards, 63-125 um	LCY-2	Atitlán Caldera	Los Chocoyos	Terrestrial Initial tephra fall deposit	2022-03-01	5	3	1	1	Single Analysis	77.0938	0.0650881	13.2946	0.526884	0.0560333	0.0904416	0.723853	2.81232	5.33701		100	93.8727

## Sheet: 5. 3 um Beam Overlap Tests
DATA TABLE NAME	EPMA 3 um Beam Overlap Tests
TECHNIQUE	EPMA
INSTRUMENT	Jeol JXA-iSP100 Electron Probe
LABORATORY	University of St Andrews Electron Microprobe Facility
Beam conditions: 3 um, 1 nA, 15 kV
Standard	Beam Conditions			SiO2	TiO2	Al2O3	MnO	MgO	CaO	K2O	FeO	P2O5	Na2O	Total
Old Crow		INTAV Recommended (Kuehn et al. 2011)	Value	75.47	0.31	13.08	0.05	0.29	1.5	3.73	1.7	0.04	3.83
			95% Uncertainty	1.7	0.05	0.3	0.02	0.02	0.05	0.28	0.12	0.02	0.38
	3 um 1 nA 15 kV	Polished,	Mean	75.62	0.3	13.12	0.06	0.31	1.45	3.67	1.69	0.07	3.71	96.11
		No Overlap	(n=19)
			1σ	0.64	0.05	0.36	0.06	0.05	0.1	0.11	0.13	0.08	0.41	1.17
	3 um 1 nA 15 kV	Polished, Overlap	Mean	75.04	0.28	13.28	0.08	0.27	1.45	3.64	1.78	0.32	3.85
			(n=21)
			1σ	1.91	0.1	1.32	0.1	0.1	0.12	0.17	0.25	0.38	0.64
Mt Edziza (Sheep Track)		INTAV Recommended (Kuehn et al. 2011)	Value	62.28	0.24	17.8	0.14	0.13	1.1	5.4	4.6	0.04	8.28
			95% Uncertainty	1.4	0.03	0.7	0.03	0.03	0.12	0.2	0.28	0.03	0.2
	3 um 1 nA 15 kV	Polished,	Mean	62.61	0.22	17.98	0.13	0.13	1.02	5.27	4.55	0.08	7.99	99.79
		No Overlap	(n=20)
			1σ	0.55	0.05	0.32	0.09	0.06	0.18	0.19	0.18	0.1	0.57	1.73
	3 um 1 nA 15 kV	Polished, Overlap	Mean	63.23	0.21	17.61	0.14	0.12	0.88	5.25	4.48	0.22	7.84
			(n=11)
			1σ	1.78	0.07	1.3	0.07	0.05	0.12	0.33	0.34	0.35	0.82
Results of testing broad beam overlap method on Old Crow and Mt Edziza INTAV tephra standards, using EPMA beam conditions 3 μm beam diameter, 1 nA current, and 15 kV accelerating voltage. Analyses where overlap is used are compared to analysis where there was no overlap onto resin. Overlap means include all measurements where beam was positioned between 70 – 95% on the tephra shard. Overlap total…
